# Supplementary material
Source: MDPI journal article supplement (https://www.mdpi.com/2306-5729/5/2/54)
Supplement: s1 [file s1]

## Sheet: Information
The following table shows the manure sources with its code name used in the following spreadsheets. All farms are located within Iowa.
Code Name	Manure Sources
Deeppit 1	Iowa Selected Farms
Deeppit 2	Ag 450
Deeppit 3	Crawford
Outdoor	Crawford outdoor
LIST OF MANURE ADDITIVE PRODUCTS AND THEIR ABBREVIATIONS
Abbreviations	Product Name
Triune	Triune
Confine	Confine N
MMP	Manure Master Plus
Sulfi	Sulfi-dox
WW	Waste Away
Enviro	Enviro Lagoon
MTM	More than Manure
Oxydol	Oxydol
Sludge	Sludge Away
Penergetic	Penergetic G
MM	Manure Magic
LLMO	LLMO-SST
Simulators are the pilot-scale experiment setup where we stored the manure, applied treatment, and took the measurements
Simulator Height (m)
1.22
Simulator Diameter (m)
0.38
Initial manure added (L)
74.6
Manure adding bi-weekly (L)
9.5
ACH in Headspace
7.5
Headspace (L)	Day 1	Day 15	Day 30	Day 45
	63.7579	54.2579	44.7579	35.2579
Flow Rate (mL/min)	Day 1	Day 15	Day 30	Day 45
	7969.74	6782.24	5594.74	4407.24

## Sheet: Manure Properties
Manure properties have 4 sets of tables for 4 trials of experiments with percent total solid (TS), percent volatile soilds (VS), total nitrogen content (TKN), nitrogen content of ammonium (NH4-N), and total phosphorous (TP).
On the left side, the tables provide manure propertis of 3 different manure sources before application of any manure additive products; the tables on the right side show the manure properties after 8 weeks of experiment.
Trial 1 before applying treatments	Manure From	TS	VS	TKN	NH4-N	TP			Trial 1 manure after 8 weeks			TS	VS	TKN	NH4-N	TP
		%	%	mg/L	mg/L	mg/L			Simulator #	Manure sources	Treatment	%	%	mg/L	mg/L	mg/L		SIDENOTE: COLUMN NAMES
	Deep pit 1	6.75969	5.45964	7354.66	5453.14	2784.74			1	Deep pit 1	Triune	5.9	4.7	5500	4700	2376		Manure sources	where the manure come from
	Deep pit 2	8.1385	6.63807	6542.24	4927.83	3511.59			2	Outdoor	Confine	3.6	3	3500	3200	1944		Treatment	which product was used
	Outdoor	4.3218	3.48229	5591.1	4505.03	2151.68			3	Deep pit 2	Confine	7	5.7	4600	4000	3240		TS	Total solids
									4	Deep pit 2	Triune	6.9	5.6	4500	3800	3348		VS	Volatile solids
									5	Outdoor	MMP	3.7	2.9	3100	2800	1620		TKN	Total Nitrogen Content
									6	Deep pit 2	MMP	7	5.8	4600	3900	3024		NH4-N	Ammonium nitrogen content
									7	Deep pit 1	Sulfi	5.9	4.8	5400	4600	2592		TP	Total phosphorous
									8	Deep pit 2	Sulfi	6.8	5.5	4800	4100	3456
									9	Deep pit 2	Control	6.9	5.7	4500	4000	2808
									10	Outdoor	Sulfi	3.7	3	6100	5500	2160
									11	Deep pit 1	Control	5.7	4.6	5300	4500	2808
									12	Deep pit 1	MMP	5.6	4.6	5000	4300	2160
									13	Outdoor	Control	3.8	3	3000	2700	1728
									14	Outdoor	Triune	3.8	3	3400	3100	2160
									15	Deep pit 1	Confine	5.8	4.6	5200	4500	2592
Trial 2 before applying treatments	Manure From	TS	VS	TKN	NH4-N	TP			Trial 2 manure after 8 weeks			TS	VS	TKN	NH4-N	TP
		%	%	mg/L	mg/L	mg/L			Simulator #	Manure sources	Treatment	%	%	mg/L	mg/L	mg/L
	Deep pit 1	8.49868	6.95901	7523.43	5323.91	2735.08			1	Deep pit 1	Control	7.1	5.9	5500	4400	2500
	Deep pit 2	6.48002	5.32001	6213.8	4456.48	2009.23			2	Deep pit 2	Control	5.5	4.6	4200	3200	1700
	Outdoor	4.5413	3.73898	4070.76	2859.61	2527.69			3	Outdoor	Waste	3.9	3.2	3100	2600	2200
									4	Deep pit 1	MTM	7.2	6	5300	4200	3000
									5	Deep pit 1	Enviro	7.3	6.1	5200	4200	2000
									6	Deep pit 2	MTM	5.5	4.5	4300	3600	1800
									7	Deep pit 2	Oxy	5.6	4.6	4500	3700	1300
									8	Outdoor	Oxy	3.6	3.1	2500	2000	2000
									9	Outdoor	MTM	3.8	3.1	2800	2000	2700
									10	Deep pit 1	Waste	7.3	6	5400	4400	2600
									11	Outdoor	Control	4	3.3	2900	2500	2600
									12	Outdoor	Enviro	3.8	3.1	3000	2500	2100
									13	Deep pit 1	Oxy	7	5.9	500	4200	2600
									14	Deep pit 2	Enviro	5.5	4.5	4800	3900	200
									15	Deep pit 2	Waste	5.3	4.5	4000	3500	2200
Trial 3 before applying treatments	Manure From	TS	VS	TKN	NH4-N	TP			Trial 3 manure after 8 weeks			TS	VS	TKN	NH4-N	TP
		%	%	mg/L	mg/L	mg/L			Simulator #	Manure sources	Treatment	%	%	mg/L	mg/L	mg/L
	Deep pit 1	7.5	5.1	6320	4400	2120			1	Deep pit 1	Control	6.7	4.6	5760	4840	1800
	Deep pit 2	8.2	5.6	7090	5000	1960			2	Deep pit 1	MM	6.5	4.4	5620	4720	1720
	Deep pit 3	4.8	3.3	5050	3400	1120			3	Deep pit 2	Control	7.2	4.9	6240	5300	2130
									5	Deep pit 3	MM	4.3	3	4560	3890	1020
									7	Deep pit 2	Sludge	7	4.8	6320	5210	1680
									9	Deep pit 2	Penergetic	7.5	5.1	6100	5180	1730
									10	Deep pit 3	Control	4.2	2.9	4490	3800	1020
									11	Deep pit 2	MM	7.4	5.1	6350	5150	1820
									12	Deep pit 3	Penergetic	4.2	2.7	4650	3820	940
									13	Deep pit 1	Penergetic	6.6	4.5	5560	4680	1950
									14	Deep pit 1	Sludge	6.7	4.6	5700	4590	2100
									15	Deep pit 3	Sludge	4.4	3.1	4450	3720	960
Trial 4 before applying treatments	Manure From	TS	VS	TKN	NH4-N	TP			Trial 4 manure after 8 weeks			TS	VS	TKN	NH4-N	TP
		%	%	mg/L	mg/L	mg/L			Simulator #	Manure sources	Treatment	%	%	mg/L	mg/L	mg/L
	Deep pit 1	7.3	5.6	5510	4120	1870			1	Deep pit 1	LLMO	6.5	4.7	5210	4530	1950
	Deep pit 2	8.2	6.7	7350	5300	2450			2	Deep pit 3	Control	4.2	3.1	3750	3310	950
	Deep pit 3	4.6	3.6	4340	3050	940			8	Deep pit 1	Control	6.6	4.8	5110	4290	1710
									11	Deep pit 3	LLMO	4.2	3.1	3740	3300	880
									13	Deep pit 2	LLMO	7.7	5.6	6100	5250	2240
									14	Deep pit 2	Control	7.8	5.7	6240	5120	2460

## Sheet: NH3 & H2S
This spreadsheet has the measured concentrations and fluxes of ammonia and hydrogen sulfide for each manure source and manure additive										SIDENOTE: COLUMN HEADINGS
										Manure sources	Source of manure
										Treatment	Signifies the name of product used (or the experimental control)
Simulator #	Trial	Treatment	Manure sources	Time (day)	H₂S (ppm)	NH₃ (ppm)	H₂S Flux (mg/h/m²)	NH₃ Flux (mg/h/m²)		Time	The days before or after applying manure additives
1	1	Triune	Deep pit 1	-6	0	55.2795	0	111.759			A negative value for day means time before applying any treatment
2	1	Confine	Outdoor storage	-6	0.5	41.4767	0.913777	75.8009
3	1	Confine	Deep pit 2	-6	0.5	72.8537	0.843082	122.843
4	1	Triune	Deep pit 2	-6	0	69.511	0	136.739
5	1	MMP	Outdoor storage	-6	0.6	54.8351	1.07783	98.5049
6	1	MMP	Deep pit 2	-6	0.6	71.2367	1.08747	129.112
7	1	Sulfdox	Deep pit 1	-6	0.4	130.484	0.731839	238.732
8	1	Sulfdox	Deep pit 2	-6	0	66.3485	0	128.197
9	1	Control	Deep pit 2	-6	0.7	105.988	1.32338	200.376
10	1	Sulfdox	Outdoor storage	-6	0.6	17.4689	1.11287	32.4009
11	1	Control	Deep pit 1	-6	0.5	96.3865	0.884324	170.474
12	1	MMP	Deep pit 1	-6	0	118.531	0	225.797
13	1	Control	Outdoor storage	-6	0.6	44.8515	1.1328	84.6792
14	1	Triune	Outdoor storage	-6	0	50.5357	0	98.6299
15	1	Confine	Deep pit 1	-6	0.5	97.6954	0.926843	181.097
1	1	Triune	Deep pit 1	-1	0.4	34.5363	0.758409	65.4816
2	1	Confine	Outdoor storage	-1	0	15.7476	0	35.476
3	1	Confine	Deep pit 2	-1	0.4	59.4953	0.674466	100.319
4	1	Triune	Deep pit 2	-1	0	71.0923	0	139.694
5	1	MMP	Outdoor storage	-1	0	34.7229	0	68.958
6	1	MMP	Deep pit 2	-1	0.5	67.8619	0.910201	123.536
7	1	Sulfdox	Deep pit 1	-1	0.6	102.614	1.09776	187.742
8	1	Sulfdox	Deep pit 2	-1	0	57.406	0	107.908
9	1	Control	Deep pit 2	-1	0.7	100.284	1.32338	189.591
10	1	Sulfdox	Outdoor storage	-1	0.9	17.8939	1.6693	33.1892
11	1	Control	Deep pit 1	-1	0.5	104.811	0.884324	185.374
12	1	MMP	Deep pit 1	-1	0.5	107.974	0.923923	199.519
13	1	Control	Outdoor storage	-1	0	28.3978	0	60.5328
14	1	Triune	Outdoor storage	-1	0	25.2352	0	52.5895
15	1	Confine	Deep pit 1	-1	0	107.324	0	201.774
1	1	Triune	Deep pit 1	2	0	57.6514	0	116.256
2	1	Confine	Outdoor storage	2	0.4	26.9099	0.731021	49.1792
3	1	Confine	Deep pit 2	2	0.5	46.4685	0.843082	78.3535
4	1	Triune	Deep pit 2	2	2.1	55.3743	3.92416	103.475
5	1	MMP	Outdoor storage	2	0.7	18.2754	1.25747	32.8297
6	1	MMP	Deep pit 2	2	0.5	72.1406	0.910201	131.325
7	1	Sulfdox	Deep pit 1	2	0.7	57.4967	1.28072	105.196
8	1	Sulfdox	Deep pit 2	2	0.5	61.4439	0.915529	112.507
9	1	Control	Deep pit 2	2	0.8	87.0918	1.51244	164.651
10	1	Sulfdox	Outdoor storage	2	0.9	11.4758	1.6693	21.2852
11	1	Control	Deep pit 1	2	0.6	81.5106	1.06119	144.164
12	1	MMP	Deep pit 1	2	0.6	81.9334	1.10871	151.4
13	1	Control	Outdoor storage	2	1	8.86521	1.88799	16.7375
14	1	Triune	Outdoor storage	2	0.6	26.1659	1.09185	47.6152
15	1	Confine	Deep pit 1	2	0.6	84.7859	1.11221	157.166
1	1	Triune	Deep pit 1	4	0.6	64.8187	1.13761	122.898
2	1	Confine	Outdoor storage	4	0.6	28.5378	1.09653	52.1544
3	1	Confine	Deep pit 2	4	1	79.0309	1.68616	133.259
4	1	Triune	Deep pit 2	4	1.3	82.7372	2.42924	154.607
5	1	MMP	Outdoor storage	4	0.9	22.1725	1.61675	39.8304
6	1	MMP	Deep pit 2	4	0.5	74.2799	0.910201	135.219
7	1	Sulfdox	Deep pit 1	4	0.8	90.2543	1.46368	165.129
8	1	Sulfdox	Deep pit 2	4	0.5	62.157	0.915529	113.813
9	1	Control	Deep pit 2	4	0.4	75.9295	0.756219	143.548
10	1	Sulfdox	Outdoor storage	4	1.2	13.6557	2.22574	25.3284
11	1	Control	Deep pit 1	4	0.6	63.3924	1.06119	112.119
12	1	MMP	Deep pit 1	4	0.6	100.486	1.10871	185.683
13	1	Control	Outdoor storage	4	1.1	13.2336	2.07679	24.9849
14	1	Triune	Outdoor storage	4	0.7	47.1412	1.27382	85.7848
15	1	Confine	Deep pit 1	4	0.8	95.8141	1.48295	177.609
1	1	Triune	Deep pit 1	8	0.5	72.1406	0.948011	136.78
2	1	Confine	Outdoor storage	8	0.2	34.2048	0.365511	62.5111
3	1	Confine	Deep pit 2	8	1.6	83.3253	2.69786	140.5
4	1	Triune	Deep pit 2	8	1.4	78.9808	2.61611	147.588
5	1	MMP	Outdoor storage	8	0.7	22.5541	1.25747	40.5159
6	1	MMP	Deep pit 2	8	0	77.4174	0	147.601
7	1	Sulfdox	Deep pit 1	8	0.5	102.091	0.914799	186.786
8	1	Sulfdox	Deep pit 2	8	0	55.2795	0	107.929
9	1	Control	Deep pit 2	8	0.7	103.136	1.32338	194.984
10	1	Sulfdox	Outdoor storage	8	0.9	17.1808	1.6693	31.8665
11	1	Control	Deep pit 1	8	0.5	95.3235	0.884324	168.594
12	1	MMP	Deep pit 1	8	0.6	91.2039	1.10871	168.531
13	1	Control	Outdoor storage	8	1.1	6.12131	2.07679	11.557
14	1	Triune	Outdoor storage	8	0.5	47.8851	0.909872	87.1387
15	1	Confine	Deep pit 1	8	0.5	98.5258	0.926843	182.636
1	1	Triune	Deep pit 1	13	0	62.3953	0	125.25
2	1	Confine	Outdoor storage	13	0	31.7339	0	60.7848
3	1	Confine	Deep pit 2	13	3	82.3462	5.05849	138.849
4	1	Triune	Deep pit 2	13	0.9	77.2321	1.68178	144.32
5	1	MMP	Outdoor storage	13	0.7	18.2754	1.25747	32.8297
6	1	MMP	Deep pit 2	13	0	66.3485	0	127.451
7	1	Sulfdox	Deep pit 1	13	0.4	100.856	0.731839	184.526
8	1	Sulfdox	Deep pit 2	13	0.4	61.6347	0.732423	112.857
9	1	Control	Deep pit 2	13	0	81.3706	0	160.762
10	1	Sulfdox	Outdoor storage	13	0.7	16.8492	1.29835	31.2516
11	1	Control	Deep pit 1	13	0	89.277	0	164.38
12	1	MMP	Deep pit 1	13	0.4	91.5855	0.739138	169.236
13	1	Control	Outdoor storage	13	0.9	10.8185	1.69919	20.4252
14	1	Triune	Outdoor storage	13	0	44.57	0	83.8834
15	1	Confine	Deep pit 1	13	0	83.7425	0	162.025
1	1	Triune	Deep pit 1	16	0.5	72.1406	0.784687	113.216
2	1	Confine	Outdoor storage	16	0.6	17.7531	0.941624	27.8613
3	1	Confine	Deep pit 2	16	0.5	102.439	0.784687	160.765
4	1	Triune	Deep pit 2	16	0.9	99.902	1.41244	156.784
5	1	MMP	Outdoor storage	16	0.7	38.9558	1.09856	61.1361
6	1	MMP	Deep pit 2	16	0	75.0455	0	124.067
7	1	Sulfdox	Deep pit 1	16	1.1	83.8319	1.72631	131.564
8	1	Sulfdox	Deep pit 2	16	0	55.2795	0	92.5047
9	1	Control	Deep pit 2	16	1.1	103.086	1.72631	161.78
10	1	Sulfdox	Outdoor storage	16	0.6	32.7285	0.941624	51.3633
11	1	Control	Deep pit 1	16	0.6	60.954	0.941624	95.6596
12	1	MMP	Deep pit 1	16	0.8	77.9862	1.2555	122.39
13	1	Control	Outdoor storage	16	0.4	28.4911	0.627749	44.7132
14	1	Triune	Outdoor storage	16	0.5	24.166	0.784687	37.9254
15	1	Confine	Deep pit 1	16	0.6	91.2039	0.941624	143.133
1	1	Triune	Deep pit 1	23	0	67.1391	0	111.117
2	1	Confine	Outdoor storage	23	0.4	30.2576	0.627749	47.4855
3	1	Confine	Deep pit 2	23	0.9	112.738	1.41244	176.928
4	1	Triune	Deep pit 2	23	0.9	105.695	1.41244	165.875
5	1	MMP	Outdoor storage	23	0.6	32.7285	0.941624	51.3633
6	1	MMP	Deep pit 2	23	0.4	84.6265	0.630506	133.394
7	1	Sulfdox	Deep pit 1	23	0.9	109.172	1.41244	171.332
8	1	Sulfdox	Deep pit 2	23	0.5	70.7144	0.784687	110.977
9	1	Control	Deep pit 2	23	0.9	94.6262	1.41244	148.504
10	1	Sulfdox	Outdoor storage	23	1	14.1375	1.56937	22.187
11	1	Control	Deep pit 1	23	0.6	79.1387	0.941624	124.198
12	1	MMP	Deep pit 1	23	0.7	103.849	1.09856	162.978
13	1	Control	Outdoor storage	23	0.6	14.3063	0.941624	22.452
14	1	Triune	Outdoor storage	23	0.7	41.0951	1.09856	64.4936
15	1	Confine	Deep pit 1	23	0.5	106.392	0.784687	166.969
1	1	Triune	Deep pit 1	27	0.6	79.7941	0.941624	125.227
2	1	Confine	Outdoor storage	27	0	20.4914	0	37.9092
3	1	Confine	Deep pit 2	27	1.9	130.797	2.98181	205.27
4	1	Triune	Deep pit 2	27	1.8	110.254	2.82487	173.029
5	1	MMP	Outdoor storage	27	0	40.2913	0	65.6274
6	1	MMP	Deep pit 2	27	0	82.1612	0	135.284
7	1	Sulfdox	Deep pit 1	27	0.9	97.7627	1.41244	153.426
8	1	Sulfdox	Deep pit 2	27	0.6	76.9416	0.941624	120.75
9	1	Control	Deep pit 2	27	0.8	118.717	1.2555	186.312
10	1	Sulfdox	Outdoor storage	27	1.1	20.3647	1.72631	31.9599
11	1	Control	Deep pit 1	27	0.9	93.484	1.41244	146.711
12	1	MMP	Deep pit 1	27	0.5	111.927	0.784687	175.655
13	1	Control	Outdoor storage	27	1	18.3529	1.56937	28.8025
14	1	Triune	Outdoor storage	27	0.5	46.3039	0.784687	72.668
15	1	Confine	Deep pit 1	27	0.8	92.2485	1.2555	144.772
1	1	Triune	Deep pit 1	30	0	74.85	0	88.186
2	1	Confine	Outdoor storage	30	0	18.6737	0	23.279
3	1	Confine	Deep pit 2	30	1.1	61.2317	1.24455	69.2781
4	1	Triune	Deep pit 2	30	3.8	73.7141	4.29935	83.4007
5	1	MMP	Outdoor storage	30	0	27.3785	0	34.4764
6	1	MMP	Deep pit 2	30	0	62.9821	0	75.0869
7	1	Sulfdox	Deep pit 1	30	0	103.378	0	119.114
8	1	Sulfdox	Deep pit 2	30	0	66.938	0	79.2344
9	1	Control	Deep pit 2	30	0.5	61.0516	0.565704	69.0744
10	1	Sulfdox	Outdoor storage	30	0	21.4445	0	27.7627
11	1	Control	Deep pit 1	30	0.4	96.5706	0.452564	109.261
12	1	MMP	Deep pit 1	30	0.4	117.415	0.452564	132.844
13	1	Control	Outdoor storage	30	0	16.8293	0	22.5409
14	1	Triune	Outdoor storage	30	0	30.252	0	36.3788
15	1	Confine	Deep pit 1	30	0.7	54.0162	0.791986	61.1145
1	1	Triune	Deep pit 1	34	0	45.4866	0	53.6154
2	1	Confine	Outdoor storage	34	0.5	19.6135	0.565704	22.1909
3	1	Confine	Deep pit 2	34	1.1	92.8794	1.24455	105.085
4	1	Triune	Deep pit 2	34	2.4	71.99	2.71538	81.4501
5	1	MMP	Outdoor storage	34	0.4	65.6169	0.452564	74.2395
6	1	MMP	Deep pit 2	34	0.4	58.9136	0.454551	66.9481
7	1	Sulfdox	Deep pit 1	34	0.8	89.2809	0.905127	101.013
8	1	Sulfdox	Deep pit 2	34	0	58.893	0	68.7836
9	1	Control	Deep pit 2	34	1.5	50.6454	1.69711	57.3007
10	1	Sulfdox	Outdoor storage	34	0.5	17.176	0.565704	19.433
11	1	Control	Deep pit 1	34	0.7	103.109	0.791986	116.659
12	1	MMP	Deep pit 1	34	0.6	88.6401	0.678845	100.288
13	1	Control	Outdoor storage	34	0.4	33.3195	0.452564	37.698
14	1	Triune	Outdoor storage	34	0.5	40.942	0.565704	46.3221
15	1	Confine	Deep pit 1	34	0.6	80.0689	0.678845	90.5907
1	1	Triune	Deep pit 1	36	0	45.1803	0	54.6175
2	1	Confine	Outdoor storage	36	0	18.1479	0	24.0328
3	1	Confine	Deep pit 2	36	0.5	106.146	0.565704	120.095
4	1	Triune	Deep pit 2	36	1.7	59.8574	1.92339	67.7232
5	1	MMP	Outdoor storage	36	0	30.8613	0	37.0683
6	1	MMP	Deep pit 2	36	0	64.3775	0	75.318
7	1	Sulfdox	Deep pit 1	36	0.5	79.7485	0.565704	90.2282
8	1	Sulfdox	Deep pit 2	36	0	74.737	0	86.7096
9	1	Control	Deep pit 2	36	1.1	52.6605	1.24455	59.5805
10	1	Sulfdox	Outdoor storage	36	0.6	7.54303	0.678845	8.53425
11	1	Control	Deep pit 1	36	0.5	100.662	0.565704	113.889
12	1	MMP	Deep pit 1	36	0	76.1686	0	89.678
13	1	Control	Outdoor storage	36	0	26.5957	0	32.242
14	1	Triune	Outdoor storage	36	0	37.5646	0	44.6524
15	1	Confine	Deep pit 1	36	0.5	85.0231	0.565704	96.1959
1	1	Triune	Deep pit 1	41	0.6	35.2347	0.678845	39.8649
2	1	Confine	Outdoor storage	41	0	15.5106	0	21.049
3	1	Confine	Deep pit 2	41	1.1	55.9571	1.24455	63.3104
4	1	Triune	Deep pit 2	41	3.7	88.0294	4.18621	99.5973
5	1	MMP	Outdoor storage	41	0.6	27.9821	0.678845	31.6592
6	1	MMP	Deep pit 2	41	0.5	61.661	0.568188	70.0702
7	1	Sulfdox	Deep pit 1	41	0.7	70.4994	0.791986	79.7636
8	1	Sulfdox	Deep pit 2	41	0.5	64.708	0.565704	73.2111
9	1	Control	Deep pit 2	41	2.5	54.5086	2.82852	61.6715
10	1	Sulfdox	Outdoor storage	41	1.1	7.82631	1.24455	8.85476
11	1	Control	Deep pit 1	41	0.8	95.4973	0.905127	108.047
12	1	MMP	Deep pit 1	41	0.6	81.3876	0.678845	92.0826
13	1	Control	Outdoor storage	41	0.7	23.2801	0.791986	26.3393
14	1	Triune	Outdoor storage	41	0.4	26.682	0.452564	30.1883
15	1	Confine	Deep pit 1	41	0.7	90.9218	0.791986	102.87
1	1	Triune	Deep pit 1	44	0.6	80.7282	0.437965	58.9269
2	1	Confine	Outdoor storage	44	0.5	22.051	0.364971	16.096
3	1	Confine	Deep pit 2	44	0.9	36.1959	0.656947	26.4209
4	1	Triune	Deep pit 2	44	1	71.1323	0.729941	51.9224
5	1	MMP	Outdoor storage	44	0.9	28.9433	0.656947	21.1269
6	1	MMP	Deep pit 2	44	0.5	57.3953	0.366573	42.0792
7	1	Sulfdox	Deep pit 1	44	0.8	127.522	0.583953	93.0834
8	1	Sulfdox	Deep pit 2	44	0.7	62.8901	0.510959	45.9061
9	1	Control	Deep pit 2	44	1	65.5266	0.729941	47.8306
10	1	Sulfdox	Outdoor storage	44	0.7	25.6652	0.510959	18.7341
11	1	Control	Deep pit 1	44	1	124.149	0.729941	90.6212
12	1	MMP	Deep pit 1	44	0.7	98.8504	0.510959	72.155
13	1	Control	Outdoor storage	44	0.7	32.4209	0.510959	23.6653
14	1	Triune	Outdoor storage	44	0.6	21.3889	0.437965	15.6126
15	1	Confine	Deep pit 1	44	0.8	121.091	0.583953	88.3897
1	1	Triune	Deep pit 1	48	0	110.454	0	82.8828
2	1	Confine	Outdoor storage	48	0.6	40.5093	0.437965	29.5694
3	1	Confine	Deep pit 2	48	2	70.5744	1.45988	51.5151
4	1	Triune	Deep pit 2	48	2	102.356	1.45988	74.7139
5	1	MMP	Outdoor storage	48	1.6	28.5062	1.16791	20.8079
6	1	MMP	Deep pit 2	48	0.9	75.0961	0.659832	55.0564
7	1	Sulfdox	Deep pit 1	48	1.1	151.271	0.802935	110.419
8	1	Sulfdox	Deep pit 2	48	1	70.8012	0.729941	51.6807
9	1	Control	Deep pit 2	48	1.1	124.459	0.802935	90.8474
10	1	Sulfdox	Outdoor storage	48	2.3	22.1438	1.67886	16.1637
11	1	Control	Deep pit 1	48	0.9	141.688	0.656947	103.424
12	1	MMP	Deep pit 1	48	0.8	113.779	0.583953	83.0519
13	1	Control	Outdoor storage	48	0.7	36.2144	0.510959	26.4344
14	1	Triune	Outdoor storage	48	0.5	48.864	0.364971	35.6678
15	1	Confine	Deep pit 1	48	0.6	108.42	0.437965	79.1402
1	1	Triune	Deep pit 1	56	0.6	91.9368	0.437965	67.1084
2	1	Confine	Outdoor storage	56	0.7	123.245	0.510959	89.962
3	1	Confine	Deep pit 2	56	2.4	126.658	1.75186	92.4532
4	1	Triune	Deep pit 2	56	2	175.146	1.45988	127.846
5	1	MMP	Outdoor storage	56	1.3	69.0149	0.948923	50.3768
6	1	MMP	Deep pit 2	56	1	122.888	0.733146	90.0949
7	1	Sulfdox	Deep pit 1	56	1.2	144.269	0.875929	105.308
8	1	Sulfdox	Deep pit 2	56	0.7	150.937	0.510959	110.175
9	1	Control	Deep pit 2	56	1.1	123.849	0.802935	90.4026
10	1	Sulfdox	Outdoor storage	56	2	52.2929	1.45988	38.1707
11	1	Control	Deep pit 1	56	1	137.393	0.729941	100.289
12	1	MMP	Deep pit 1	56	1	131.461	0.729941	95.959
13	1	Control	Outdoor storage	56	0.6	78.0909	0.437965	57.0018
14	1	Triune	Outdoor storage	56	0.7	104.328	0.510959	76.1535
15	1	Confine	Deep pit 1	56	1	149.92	0.729941	109.433
1	2	Control	Deep pit 1	-6	0.0557	51.1111	0.162001	148.654
2	2	Control	Deep pit 2	-6	0.0608	83.1007	0.176834	241.694
3	2	WW	Deep pit 3	-6	0.0384	45.5271	0.111684	132.413
4	2	MTM	Deep pit 1	-6	0.029	50.9727	0.0843451	148.252
5	2	Enviro	Deep pit 1	-6	0.0525	52.5197	0.152694	152.751
6	2	MTM	Deep pit 2	-6	0.0756	73.4922	0.219879	213.748
7	2	Oxydol	Deep pit 2	-6	0.245	76.2792	0.71257	221.854
8	2	Oxydol	Deep pit 3	-6	0.0166	37.9787	0.0482803	110.459
9	2	MTM	Deep pit 3	-6	0.0294	38.3032	0.0855084	111.403
10	2	WW	Deep pit 1	-6	0.0445	53.5887	0.129426	155.86
11	2	Control	Deep pit 3	-6	0.0243	39.1886	0.0706753	113.978
12	2	Enviro	Deep pit 3	-6	0.0221	35.8709	0.0642768	104.329
13	2	Oxydol	Deep pit 1	-6	0.472	59.0695	1.37279	171.801
14	2	Enviro	Deep pit 2	-6	0.0531	95.1817	0.154439	276.831
15	2	WW	Deep pit 2	-6	0.386	71.485	1.12266	207.911
1	2	Control	Deep pit 1	-1	0.0498	42.5012	0.144841	123.613
2	2	Control	Deep pit 2	-1	0.0287	75.0266	0.0834725	218.211
3	2	WW	Deep pit 3	-1	0.00188	39.6036	0.00546789	115.185
4	2	MTM	Deep pit 1	-1	0.0181	43.8268	0.052643	127.468
5	2	Enviro	Deep pit 1	-1	0.0265	41.2838	0.0770739	120.072
6	2	MTM	Deep pit 2	-1	0.179	67.2241	0.520613	195.518
7	2	Oxydol	Deep pit 2	-1	0.201	69.7495	0.584599	202.863
8	2	Oxydol	Deep pit 3	-1	0.00994	41.4523	0.02891	120.562
9	2	MTM	Deep pit 3	-1	0.00864	37.1763	0.025129	108.125
10	2	WW	Deep pit 1	-1	0.0244	48.6109	0.0709662	141.382
11	2	Control	Deep pit 3	-1	0.0196	41.8296	0.0570056	121.659
12	2	Enviro	Deep pit 3	-1	0.00517	34.739	0.0150367	101.037
13	2	Oxydol	Deep pit 1	-1	0.599	60.5007	1.74216	175.963
14	2	Enviro	Deep pit 2	-1	0.0531	101.714	0.154439	295.83
15	2	WW	Deep pit 2	-1	0.426	83.8553	1.239	243.889
1	2	Control	Deep pit 1	2	0.0549	55.8625	0.159674	162.473
2	2	Control	Deep pit 2	2	0.0604	75.1523	0.17567	218.577
3	2	WW	Deep pit 3	2	0.00855	46.0578	0.0248673	133.957
4	2	MTM	Deep pit 1	2	0.0159	42.3126	0.0462444	123.064
5	2	Enviro	Deep pit 1	2	0.0145	41.651	0.0421725	121.14
6	2	MTM	Deep pit 2	2	0.139	88.0432	0.404275	256.069
7	2	Oxydol	Deep pit 2	2	0.185	66.223	0.538063	192.606
8	2	Oxydol	Deep pit 3	2	0	40.1645	0	116.816
9	2	MTM	Deep pit 3	2	0	34.6761	0	100.854
10	2	WW	Deep pit 1	2	0.0168	33.2248	0.048862	96.6326
11	2	Control	Deep pit 3	2	0	40.4739	0	117.716
12	2	Enviro	Deep pit 3	2	0	37.8831	0	110.181
13	2	Oxydol	Deep pit 1	2	1.381	49.9515	4.01657	145.282
14	2	Enviro	Deep pit 2	2	0.407	70.8034	1.18374	205.928
15	2	WW	Deep pit 2	2	0.494	59.5726	1.43677	173.264
1	2	Control	Deep pit 1	5	0.356	57.188	1.03541	166.329
2	2	Control	Deep pit 2	5	0	68.2604	0	198.532
3	2	WW	Deep pit 3	5	0	48.8674	0	142.129
4	2	MTM	Deep pit 1	5	0	47.2903	0	137.542
5	2	Enviro	Deep pit 1	5	0	46.8653	0	136.305
6	2	MTM	Deep pit 2	5	0.125	66.9248	0.363556	194.647
7	2	Oxydol	Deep pit 2	5	0.13	72.4861	0.378099	210.822
8	2	Oxydol	Deep pit 3	5	0	48.465	0	140.958
9	2	MTM	Deep pit 3	5	0	49.8006	0	144.843
10	2	WW	Deep pit 1	5	0	48.1455	0	140.029
11	2	Control	Deep pit 3	5	0	48.2914	0	140.453
12	2	Enviro	Deep pit 3	5	0	49.036	0	142.619
13	2	Oxydol	Deep pit 1	5	5.15	66.6682	14.9785	193.901
14	2	Enviro	Deep pit 2	5	0.182	82.5875	0.529338	240.202
15	2	WW	Deep pit 2	5	0.803	89.5725	2.33549	260.517
1	2	Control	Deep pit 1	9	2.03	62.0954	5.90415	180.601
2	2	Control	Deep pit 2	9	0.292	71.563	0.849268	208.137
3	2	WW	Deep pit 3	9	0.098	65.1238	0.285028	189.409
4	2	MTM	Deep pit 1	9	0.516	57.4924	1.50076	167.214
5	2	Enviro	Deep pit 1	9	0.057	53.8301	0.165782	156.562
6	2	MTM	Deep pit 2	9	0.318	73.4394	0.924887	213.595
7	2	Oxydol	Deep pit 2	9	0.305	73.6381	0.887077	214.173
8	2	Oxydol	Deep pit 3	9	0.031	53.2315	0.090162	154.821
9	2	MTM	Deep pit 3	9	0.03	52.6303	0.0872535	153.073
10	2	WW	Deep pit 1	9	0.198	51.5236	0.575873	149.854
11	2	Control	Deep pit 3	9	0.025	50.1452	0.0727113	145.845
12	2	Enviro	Deep pit 3	9	0.0417	58.5262	0.121282	170.221
13	2	Oxydol	Deep pit 1	9	5.358	68.6025	15.5835	199.527
14	2	Enviro	Deep pit 2	9	0.277	79.0611	0.805641	229.945
15	2	WW	Deep pit 2	9	0.819	83.7094	2.38202	243.465
1	2	Control	Deep pit 1	12	7.57	69.5407	22.017	202.256
2	2	Control	Deep pit 2	12	0.438	73.5903	1.2739	214.034
3	2	WW	Deep pit 3	12	0.312	68.9647	0.907437	200.58
4	2	MTM	Deep pit 1	12	4.16	74.5612	12.0992	216.858
5	2	Enviro	Deep pit 1	12	0.129	54.3181	0.37519	157.981
6	2	MTM	Deep pit 2	12	0.3	73.7991	0.872535	214.641
7	2	Oxydol	Deep pit 2	12	0.514	73.7312	1.49494	214.443
8	2	Oxydol	Deep pit 3	12	0.059	52.8718	0.171599	153.775
9	2	MTM	Deep pit 3	12	0.071	54.8614	0.2065	159.562
10	2	WW	Deep pit 1	12	1.59	65.8658	4.62444	191.568
11	2	Control	Deep pit 3	12	0.06	53.8679	0.174507	156.672
12	2	Enviro	Deep pit 3	12	0.08	62.2413	0.232676	181.026
13	2	Oxydol	Deep pit 1	12	8.53	82.409	24.8091	239.682
14	2	Enviro	Deep pit 2	12	0.411	75.4667	1.19537	219.491
15	2	WW	Deep pit 2	12	0.993	81.9814	2.88809	238.439
1	2	Control	Deep pit 1	16	8.39	119.339	20.7672	295.391
2	2	Control	Deep pit 2	16	2.3	93.4889	5.69303	231.406
3	2	WW	Deep pit 3	16	1.46	71.2008	3.61384	176.238
4	2	MTM	Deep pit 1	16	7.02	117.435	17.3761	290.677
5	2	Enviro	Deep pit 1	16	2.29	88.257	5.66828	218.456
6	2	MTM	Deep pit 2	16	0.406	86.0989	1.00494	213.115
7	2	Oxydol	Deep pit 2	16	0.32	87.6282	0.792074	216.9
8	2	Oxydol	Deep pit 3	16	0.626	74.4858	1.54949	184.369
9	2	MTM	Deep pit 3	16	0.521	62.9531	1.2896	155.823
10	2	WW	Deep pit 1	16	6.284	100.562	15.5543	248.914
11	2	Control	Deep pit 3	16	0.512	69.5558	1.26732	172.167
12	2	Enviro	Deep pit 3	16	0.582	77.5796	1.44058	192.027
13	2	Oxydol	Deep pit 1	16	5.587	100.006	13.8291	247.538
14	2	Enviro	Deep pit 2	16	0.357	85.7216	0.883657	212.181
15	2	WW	Deep pit 2	16	0.967	90.1712	2.39355	223.194
1	2	Control	Deep pit 1	19	6.52	100.064	16.1385	247.681
2	2	Control	Deep pit 2	19	0.807	84.391	1.99751	208.887
3	2	WW	Deep pit 3	19	2.03	72.3075	5.02472	178.978
4	2	MTM	Deep pit 1	19	6.67	93.1065	16.5098	230.46
5	2	Enviro	Deep pit 1	19	6.79	90.3498	16.8068	223.636
6	2	MTM	Deep pit 2	19	0.109	82.9648	0.2698	205.357
7	2	Oxydol	Deep pit 2	19	0.309	78.2185	0.764846	193.609
8	2	Oxydol	Deep pit 3	19	0.793	71.568	1.96286	177.147
9	2	MTM	Deep pit 3	19	0.722	65.9916	1.78712	163.344
10	2	WW	Deep pit 1	19	12.58	118.111	31.1384	292.352
11	2	Control	Deep pit 3	19	0.472	66.135	1.16831	163.699
12	2	Enviro	Deep pit 3	19	0.573	68.3082	1.41831	169.079
13	2	Oxydol	Deep pit 1	19	9.89	106.918	24.48	264.647
14	2	Enviro	Deep pit 2	19	0.178	72.139	0.440591	178.561
15	2	WW	Deep pit 2	19	0.741	89.1902	1.83415	220.766
1	2	Control	Deep pit 1	23	9.48	104.194	23.4652	257.904
2	2	Control	Deep pit 2	23	2.79	89.2808	6.90589	220.99
3	2	WW	Deep pit 3	23	1.78	72.061	4.40591	178.368
4	2	MTM	Deep pit 1	23	6.26	89.8769	15.4949	222.466
5	2	Enviro	Deep pit 1	23	12.68	106.825	31.3859	264.416
6	2	MTM	Deep pit 2	23	0.449	74.6442	1.11138	184.762
7	2	Oxydol	Deep pit 2	23	0.378	77.7305	0.935637	192.401
8	2	Oxydol	Deep pit 3	23	1.08	69.8073	2.67325	172.789
9	2	MTM	Deep pit 3	23	2.33	73.9726	5.76729	183.099
10	2	WW	Deep pit 1	23	15.14	126.251	37.475	312.499
11	2	Control	Deep pit 3	23	0.825	69.8903	2.04207	172.995
12	2	Enviro	Deep pit 3	23	1.41	68.1875	3.49007	168.78
13	2	Oxydol	Deep pit 1	23	8.69	97.9258	21.5098	242.389
14	2	Enviro	Deep pit 2	23	0.379	65.7099	0.938112	162.647
15	2	WW	Deep pit 2	23	0.515	90.8931	1.27474	224.981
1	2	Control	Deep pit 1	26	10.05	95.6847	24.8761	236.842
2	2	Control	Deep pit 2	26	2.76	83.1233	6.83164	205.749
3	2	WW	Deep pit 3	26	1.54	66.2129	3.81185	163.892
4	2	MTM	Deep pit 1	26	8.26	93.9341	20.4454	232.508
5	2	Enviro	Deep pit 1	26	15.9	115.058	39.3562	284.794
6	2	MTM	Deep pit 2	26	0.565	76.6137	1.39851	189.637
7	2	Oxydol	Deep pit 2	26	0.555	80.2207	1.37375	198.565
8	2	Oxydol	Deep pit 3	26	1.49	70.0437	3.68809	173.374
9	2	MTM	Deep pit 3	26	3.66	77.9921	9.05934	193.048
10	2	WW	Deep pit 1	26	17.51	137.343	43.3413	339.956
11	2	Control	Deep pit 3	26	2.356	70.1957	5.83164	173.75
12	2	Enviro	Deep pit 3	26	2.655	69.6841	6.57174	172.484
13	2	Oxydol	Deep pit 1	26	14.123	107.758	34.9577	266.726
14	2	Enviro	Deep pit 2	26	0.295	71.0398	0.730193	175.84
15	2	WW	Deep pit 2	26	0.617	92.8374	1.52722	229.794
1	2	Control	Deep pit 1	30	4.2	123.901	8.57644	253.008
2	2	Control	Deep pit 2	30	0.323	112.887	0.659569	230.516
3	2	WW	Deep pit 3	30	1.2	75.1523	2.45041	153.462
4	2	MTM	Deep pit 1	30	4.5	124.176	9.18905	253.568
5	2	Enviro	Deep pit 1	30	10.47	152.792	21.3798	312.003
6	2	MTM	Deep pit 2	30	1.202	105.499	2.4545	215.431
7	2	Oxydol	Deep pit 2	30	0.475	100.2	0.969955	204.609
8	2	Oxydol	Deep pit 3	30	2.84	96.0545	5.79931	196.144
9	2	MTM	Deep pit 3	30	5.76	101.5	11.762	207.264
10	2	WW	Deep pit 1	30	4.14	129.903	8.45392	265.263
11	2	Control	Deep pit 3	30	3.42	107.421	6.98368	219.355
12	2	Enviro	Deep pit 3	30	2.95	101.965	6.02393	208.214
13	2	Oxydol	Deep pit 1	30	6.2	126.716	12.6605	258.755
14	2	Enviro	Deep pit 2	30	0.358	93.7127	0.73104	191.362
15	2	WW	Deep pit 2	30	0.294	114.228	0.600351	233.254
1	2	Control	Deep pit 1	33	5.92	120.161	12.0887	245.37
2	2	Control	Deep pit 2	33	0.084	107.406	0.171529	219.324
3	2	WW	Deep pit 3	33	1.33	70.8612	2.71587	144.699
4	2	MTM	Deep pit 1	33	7.96	107.547	16.2544	219.612
5	2	Enviro	Deep pit 1	33	13.1	134.707	26.7503	275.073
6	2	MTM	Deep pit 2	33	0.568	87.9552	1.15986	179.605
7	2	Oxydol	Deep pit 2	33	0.719	93.1568	1.46821	190.227
8	2	Oxydol	Deep pit 3	33	2.83	85.2563	5.77889	174.094
9	2	MTM	Deep pit 3	33	4.01	85.7694	8.18846	175.142
10	2	WW	Deep pit 1	33	8.15	118.981	16.6424	242.961
11	2	Control	Deep pit 3	33	4.55	95.0081	9.29115	194.008
12	2	Enviro	Deep pit 3	33	3.42	90.4957	6.98368	184.793
13	2	Oxydol	Deep pit 1	33	10.5	128.021	21.4411	261.421
14	2	Enviro	Deep pit 2	33	0.344	91.4389	0.702452	186.719
15	2	WW	Deep pit 2	33	0.245	100.305	0.500293	204.825
1	2	Control	Deep pit 1	37	14.2	113.558	28.9965	231.888
2	2	Control	Deep pit 2	37	0.468	100.368	0.955661	204.953
3	2	WW	Deep pit 3	37	2.06	72.0711	4.20654	147.17
4	2	MTM	Deep pit 1	37	14.1	116.069	28.7923	237.014
5	2	Enviro	Deep pit 1	37	17.7	136.928	36.1436	279.609
6	2	MTM	Deep pit 2	37	0.369	80.9174	0.753502	165.234
7	2	Oxydol	Deep pit 2	37	1.12	90.2919	2.28705	184.377
8	2	Oxydol	Deep pit 3	37	2.23	86.9063	4.55368	177.464
9	2	MTM	Deep pit 3	37	2.63	74.0104	5.37049	151.13
10	2	WW	Deep pit 1	37	15.4	132.602	31.447	270.774
11	2	Control	Deep pit 3	37	2.53	88.252	5.16629	180.212
12	2	Enviro	Deep pit 3	37	3.11	88.1388	6.35065	179.98
13	2	Oxydol	Deep pit 1	37	11.8	123.828	24.0957	252.859
14	2	Enviro	Deep pit 2	37	0.43	102.931	0.878064	210.187
15	2	WW	Deep pit 2	37	0.437	104.451	0.892359	213.289
1	2	Control	Deep pit 1	40	29.88	122.9	61.0153	250.964
2	2	Control	Deep pit 2	40	0.674	95.2546	1.37631	194.511
3	2	WW	Deep pit 3	40	6.49	69.8501	13.2526	142.635
4	2	MTM	Deep pit 1	40	24.59	121.607	50.213	248.324
5	2	Enviro	Deep pit 1	40	24.28	141.347	49.58	288.633
6	2	MTM	Deep pit 2	40	0.62	79.6799	1.26605	162.707
7	2	Oxydol	Deep pit 2	40	1.12	108.606	2.28705	221.774
8	2	Oxydol	Deep pit 3	40	4.54	95.1691	9.27073	194.336
9	2	MTM	Deep pit 3	40	4.91	90.6793	10.0263	185.168
10	2	WW	Deep pit 1	40	26.94	135.698	55.0118	277.097
11	2	Control	Deep pit 3	40	5.49	94.0271	11.2106	192.004
12	2	Enviro	Deep pit 3	40	4.74	95.2747	9.67913	194.552
13	2	Oxydol	Deep pit 1	40	16.52	132.785	33.734	271.149
14	2	Enviro	Deep pit 2	40	4.86	109.901	9.92417	224.419
15	2	WW	Deep pit 2	40	2.24	108.716	4.5741	222
1	2	Control	Deep pit 1	44	7.76	128.298	12.4814	206.358
2	2	Control	Deep pit 2	44	0.437	107.909	0.702882	173.564
3	2	WW	Deep pit 3	44	4.08	78.465	6.56238	126.205
4	2	MTM	Deep pit 1	44	13.52	155.091	21.7459	249.452
5	2	Enviro	Deep pit 1	44	9.35	148.443	15.0388	238.76
6	2	MTM	Deep pit 2	44	0.303	129.178	0.487353	207.774
7	2	Oxydol	Deep pit 2	44	0.561	125.358	0.902327	201.629
8	2	Oxydol	Deep pit 3	44	8.07	122.875	12.98	197.635
9	2	MTM	Deep pit 3	44	0.432	99.1307	0.69484	159.444
10	2	WW	Deep pit 1	44	11.1	161.611	17.8535	259.939
11	2	Control	Deep pit 3	44	2.7	97.6215	4.34275	157.017
12	2	Enviro	Deep pit 3	44	2.86	98.5924	4.6001	158.579
13	2	Oxydol	Deep pit 1	44	3.74	151.869	6.01551	244.27
14	2	Enviro	Deep pit 2	44	0.473	108.722	0.760785	174.87
15	2	WW	Deep pit 2	44	0.27	115.498	0.434275	185.769
1	2	Control	Deep pit 1	47	9.16	130.411	14.7332	209.756
2	2	Control	Deep pit 2	47	0.258	125.924	0.414974	202.539
3	2	WW	Deep pit 3	47	6.85	99.6966	11.0177	160.355
4	2	MTM	Deep pit 1	47	26.47	189.88	42.575	305.408
5	2	Enviro	Deep pit 1	47	17.69	203.171	28.453	326.785
6	2	MTM	Deep pit 2	47	0.278	150.42	0.447142	241.94
7	2	Oxydol	Deep pit 2	47	0.58	142.278	0.932887	228.844
8	2	Oxydol	Deep pit 3	47	9.72	139.129	15.6339	223.779
9	2	MTM	Deep pit 3	47	4.04	113.081	6.49804	181.882
10	2	WW	Deep pit 1	47	32.1	190.378	51.6305	306.209
11	2	Control	Deep pit 3	47	1.95	103.973	3.13643	167.232
12	2	Enviro	Deep pit 3	47	2.66	100.924	4.27841	162.329
13	2	Oxydol	Deep pit 1	47	35.27	187.116	56.7292	300.962
14	2	Enviro	Deep pit 2	47	1.08	149.243	1.7371	240.046
15	2	WW	Deep pit 2	47	0.823	151.738	1.32373	244.06
1	2	Control	Deep pit 1	51	54.4	307.654	87.4983	494.839
2	2	Control	Deep pit 2	51	1.25	137.328	2.01053	220.882
3	2	WW	Deep pit 3	51	18	110.032	28.9517	176.978
4	2	MTM	Deep pit 1	51	46.7	400.69	75.1135	644.48
5	2	Enviro	Deep pit 1	51	46	446.328	73.9876	717.885
6	2	MTM	Deep pit 2	51	2.25	159.835	3.61896	257.083
7	2	Oxydol	Deep pit 2	51	4.35	143.322	6.99665	230.523
8	2	Oxydol	Deep pit 3	51	25.2	164.063	40.5323	263.883
9	2	MTM	Deep pit 3	51	23.1	143.81	37.1546	231.308
10	2	WW	Deep pit 1	51	45.6	703.291	73.3442	1131.19
11	2	Control	Deep pit 3	51	19.8	159.704	31.8468	256.872
12	2	Enviro	Deep pit 3	51	20.8	231.352	33.4552	372.113
13	2	Oxydol	Deep pit 1	51	49.5	704.307	79.6171	1132.82
14	2	Enviro	Deep pit 2	51	1.31	165.17	2.10704	265.663
15	2	WW	Deep pit 2	51	2.46	164.408	3.95673	264.438
1	2	Control	Deep pit 1	54	42	290.248	67.5539	466.843
2	2	Control	Deep pit 2	54	0.654	133.392	1.05191	214.55
3	2	WW	Deep pit 3	54	9.47	122.276	15.2318	196.673
4	2	MTM	Deep pit 1	54	39.1	359.381	62.8894	578.038
5	2	Enviro	Deep pit 1	54	39	383.365	62.7286	616.613
6	2	MTM	Deep pit 2	54	1.43	156.223	2.30005	251.273
7	2	Oxydol	Deep pit 2	54	2.45	138.638	3.94064	222.99
8	2	Oxydol	Deep pit 3	54	12.5	199.056	20.1053	320.167
9	2	MTM	Deep pit 3	54	15.9	216.155	25.574	347.669
10	2	WW	Deep pit 1	54	44.4	542.035	71.4141	871.822
11	2	Control	Deep pit 3	54	14.9	244.213	23.9655	392.799
12	2	Enviro	Deep pit 3	54	14.1	241.056	22.6788	387.721
13	2	Oxydol	Deep pit 1	54	45.4	679.68	73.0225	1093.21
14	2	Enviro	Deep pit 2	54	0.567	162.916	0.911977	262.038
15	2	WW	Deep pit 2	54	2.13	168.867	3.42595	271.611
1	3	Control	Deep pit 1	-1	16.9863	262.258	98.0613	756.16
2	3	MM	Deep pit 1	-1	1.79553	128.761	10.3655	371.254
3	3	Control	Deep pit 2	-1	3.98603	200.239	23.0112	577.341
5	3	MM	Deep pit 3	-1	5.16586	164.46	29.8223	474.181
7	3	Sludge	Deep pit 2	-1	15.3751	322.933	88.7598	931.103
9	3	Peneteric	Deep pit 2	-1	6.22317	271.527	35.9262	782.886
10	3	Control	Deep pit 3	-1	3.44628	236.21	19.8953	681.056
11	3	MM	Deep pit 2	-1	5.69074	193.609	32.8525	558.226
12	3	Peneteric	Deep pit 3	-1	4.64445	195.962	26.8123	565.012
13	3	Peneteric	Deep pit 1	-1	0.989393	127.827	5.71174	368.561
14	3	Sludge	Deep pit 1	-1	3.48365	164.454	20.111	474.165
15	3	Sludge	Deep pit 3	-1	3.68557	190.318	21.2767	548.738
1	3	Control	Deep pit 1	2	12.9137	225.744	74.5503	650.879
2	3	MM	Deep pit 1	2	10.1664	198.25	58.6903	571.607
3	3	Control	Deep pit 2	2	4.54149	215.355	26.2179	620.925
5	3	MM	Deep pit 3	2	2.19492	138.159	12.6712	398.349
7	3	Sludge	Deep pit 2	2	32.9677	337.017	190.321	971.71
9	3	Peneteric	Deep pit 2	2	4.99729	232.256	28.8492	669.655
10	3	Control	Deep pit 3	2	2.68425	152.743	15.4961	440.4
11	3	MM	Deep pit 2	2	16.0755	375.629	92.8034	1083.04
12	3	Peneteric	Deep pit 3	2	2.33748	158.841	13.4942	457.982
13	3	Peneteric	Deep pit 1	2	3.0385	141.469	17.5412	407.894
14	3	Sludge	Deep pit 1	2	2.75067	133.687	15.8795	385.456
15	3	Sludge	Deep pit 3	2	2.20593	149.28	12.7348	430.415
1	3	Control	Deep pit 1	5	8.16	203.41	47.1074	586.485
2	3	MM	Deep pit 1	5	5.934	173.48	34.2568	500.189
3	3	Control	Deep pit 2	5	9.83	275.81	56.7483	795.234
5	3	MM	Deep pit 3	5	2.09	154.16	12.0655	444.485
7	3	Sludge	Deep pit 2	5	37.37	303.45	215.736	874.928
9	3	Peneteric	Deep pit 2	5	13.48	334.27	77.8196	963.79
10	3	Control	Deep pit 3	5	4.298	178.69	24.8122	515.211
11	3	MM	Deep pit 2	5	19.685	389.31	113.641	1122.48
12	3	Peneteric	Deep pit 3	5	1.504	126.1	8.68254	363.58
13	3	Peneteric	Deep pit 1	5	3.657	120.53	21.1117	347.52
14	3	Sludge	Deep pit 1	5	7.515	149.57	43.3839	431.25
15	3	Sludge	Deep pit 3	5	2.884	142.25	16.6492	410.145
1	3	Control	Deep pit 1	9	12.6111	199.514	72.8033	575.253
2	3	MM	Deep pit 1	9	4.81037	154.292	27.7701	444.866
3	3	Control	Deep pit 2	9	28.1065	345.753	162.258	996.9
5	3	MM	Deep pit 3	9	4.02876	212.464	23.2579	612.59
7	3	Sludge	Deep pit 2	9	4.24481	270.006	24.5052	778.499
9	3	Peneteric	Deep pit 2	9	33.1372	550.805	191.3	1588.12
10	3	Control	Deep pit 3	9	0.860919	173.728	4.97006	500.904
11	3	MM	Deep pit 2	9	1.34069	158.232	7.73977	456.226
12	3	Peneteric	Deep pit 3	9	0.4942	173.248	2.853	499.52
13	3	Peneteric	Deep pit 1	9	0.545199	129.603	3.14742	373.681
14	3	Sludge	Deep pit 1	9	8.4402	240.975	48.725	694.794
15	3	Sludge	Deep pit 3	9	2.09944	207.374	12.12	597.915
1	3	Control	Deep pit 1	12	1.834	132.28	10.5876	381.399
2	3	MM	Deep pit 1	12	3.79	172.24	21.8795	496.614
3	3	Control	Deep pit 2	12	23.342	521.81	134.753	1504.52
5	3	MM	Deep pit 3	12	0.7447	141.085	4.29913	406.786
7	3	Sludge	Deep pit 2	12	8.829	312.394	50.9695	900.715
9	3	Peneteric	Deep pit 2	12	32.7808	609.124	189.243	1756.27
10	3	Control	Deep pit 3	12	1.5588	121.609	8.9989	350.631
11	3	MM	Deep pit 2	12	2.5568	170.81	14.7603	492.491
12	3	Peneteric	Deep pit 3	12	0.6439	121.16	3.71721	349.337
13	3	Peneteric	Deep pit 1	12	6.83	149.03	39.4294	429.693
14	3	Sludge	Deep pit 1	12	5.2005	135.23	30.0223	389.904
15	3	Sludge	Deep pit 3	12	3.1729	161.09	18.3171	464.466
1	3	Control	Deep pit 1	16	5.929	82.36	28.1622	195.383
2	3	MM	Deep pit 1	16	4.525	100.17	21.4933	237.634
3	3	Control	Deep pit 2	16	22.381	261.01	106.308	619.196
5	3	MM	Deep pit 3	16	3.474	154.78	16.5012	367.186
7	3	Sludge	Deep pit 2	16	24.433	301.42	116.055	715.061
9	3	Peneteric	Deep pit 2	16	10.742	201.13	51.0235	477.142
10	3	Control	Deep pit 3	16	2.719	159.89	12.915	379.308
11	3	MM	Deep pit 2	16	6.899	231.98	32.7696	550.328
12	3	Peneteric	Deep pit 3	16	2.556	161.27	12.1408	382.582
13	3	Peneteric	Deep pit 1	16	5.058	150.13	24.025	356.155
14	3	Sludge	Deep pit 1	16	3.92	143.01	18.6196	339.264
15	3	Sludge	Deep pit 3	16	3.218	154.47	15.2852	366.451
1	3	Control	Deep pit 1	19	0.811	100.7	3.85218	238.891
2	3	MM	Deep pit 1	19	2.065	93.1	9.80857	220.862
3	3	Control	Deep pit 2	19	13.9	288.4	66.0238	684.174
5	3	MM	Deep pit 3	19	6.35	211.6	30.1619	501.981
7	3	Sludge	Deep pit 2	19	6.28	313.9	29.8294	744.668
9	3	Peneteric	Deep pit 2	19	5.6	323.3	26.5995	766.967
10	3	Control	Deep pit 3	19	6	224.3	28.4995	532.109
11	3	MM	Deep pit 2	19	4.25	223.3	20.1871	529.737
12	3	Peneteric	Deep pit 3	19	4.542	199.6	21.5741	473.513
13	3	Peneteric	Deep pit 1	19	10.049	202.9	47.7319	481.341
14	3	Sludge	Deep pit 1	19	14.245	270.2	67.6625	640.998
15	3	Sludge	Deep pit 3	19	5.455	224.5	25.9108	532.583
1	3	Control	Deep pit 1	23	2.367	127.7	11.243	302.944
2	3	MM	Deep pit 1	23	7	85.49	33.2494	202.809
3	3	Control	Deep pit 2	23	34.4	580.474	163.397	1377.06
5	3	MM	Deep pit 3	23	9.702	253.181	46.0836	600.623
7	3	Sludge	Deep pit 2	23	7.345	368.236	34.8881	873.569
9	3	Peneteric	Deep pit 2	23	35.631	563.59	169.244	1337.01
10	3	Control	Deep pit 3	23	3.818	238.574	18.1352	565.971
11	3	MM	Deep pit 2	23	33.272	694.1	158.039	1646.62
12	3	Peneteric	Deep pit 3	23	1.686	231.774	8.00835	549.839
13	3	Peneteric	Deep pit 1	23	0	130	0	308.4
14	3	Sludge	Deep pit 1	23	10.5	250.5	49.8741	594.263
15	3	Sludge	Deep pit 3	23	5.203	241.122	24.7138	572.016
1	3	Control	Deep pit 1	26	0	83.144	0	197.243
2	3	MM	Deep pit 1	26	0	104.998	0	249.088
3	3	Control	Deep pit 2	26	20.764	517.589	98.6271	1227.88
5	3	MM	Deep pit 3	26	4.547	174.943	21.5978	415.019
7	3	Sludge	Deep pit 2	26	44.6	433.097	211.846	1027.44
9	3	Peneteric	Deep pit 2	26	9.7	309.808	46.0741	734.96
10	3	Control	Deep pit 3	26	3.454	136.626	16.4062	324.119
11	3	MM	Deep pit 2	26	46.768	494.5	222.144	1173.11
12	3	Peneteric	Deep pit 3	26	3.25	130.36	15.4372	309.254
13	3	Peneteric	Deep pit 1	26	0	51.8	0	122.886
14	3	Sludge	Deep pit 1	26	7.426	69.604	35.2728	165.122
15	3	Sludge	Deep pit 3	26	7.46	150.026	35.4343	355.908
1	3	Control	Deep pit 1	30	0.91	78.53	3.65743	157.636
2	3	MM	Deep pit 1	30	1.404	87.95	5.64289	176.545
3	3	Control	Deep pit 2	30	20.327	368.789	81.6974	740.284
5	3	MM	Deep pit 3	30	4.732	178.345	19.0186	357.999
7	3	Sludge	Deep pit 2	30	41.765	684.654	167.86	1374.33
9	3	Peneteric	Deep pit 2	30	7.654	358.156	30.7626	718.94
10	3	Control	Deep pit 3	30	3.93	184.428	15.7953	370.209
11	3	MM	Deep pit 2	30	10.314	391.08	41.4536	785.03
12	3	Peneteric	Deep pit 3	30	6.658	249.489	26.7595	500.809
13	3	Peneteric	Deep pit 1	30	0.774	131.255	3.11083	263.473
14	3	Sludge	Deep pit 1	30	1.858	142.167	7.46759	285.377
15	3	Sludge	Deep pit 3	30	5.893	209.977	23.6849	421.495
1	3	Control	Deep pit 1	33	0	78.16	0	156.894
2	3	MM	Deep pit 1	33	7.786	74.84	31.2931	150.229
3	3	Control	Deep pit 2	33	20.394	381.283	81.9666	765.364
5	3	MM	Deep pit 3	33	7.939	185.286	31.9081	371.932
7	3	Sludge	Deep pit 2	33	23.161	503.227	93.0877	1010.15
9	3	Peneteric	Deep pit 2	33	14.874	474.496	59.7809	952.474
10	3	Control	Deep pit 3	33	5.602	209.133	22.5153	419.801
11	3	MM	Deep pit 2	33	8.055	367.4	32.3743	737.496
12	3	Peneteric	Deep pit 3	33	3.884	208.142	15.6104	417.811
13	3	Peneteric	Deep pit 1	33	0	101.369	0	203.482
14	3	Sludge	Deep pit 1	33	0.402	97.455	1.6157	195.625
15	3	Sludge	Deep pit 3	33	2.434	162.5	9.78262	326.192
1	3	Control	Deep pit 1	37	0.885	92.63	3.55695	185.94
2	3	MM	Deep pit 1	37	2.756	85.9	11.0768	172.43
3	3	Control	Deep pit 2	37	20.644	335.88	82.9714	674.225
5	3	MM	Deep pit 3	37	11.117	210.348	44.6809	422.24
7	3	Sludge	Deep pit 2	37	18.368	439.818	73.8238	882.863
9	3	Peneteric	Deep pit 2	37	16.305	468.52	65.5323	940.478
10	3	Control	Deep pit 3	37	8.336	247.305	33.5037	496.425
11	3	MM	Deep pit 2	37	25.723	438.514	103.385	880.246
12	3	Peneteric	Deep pit 3	37	9.32	299.878	37.4585	601.957
13	3	Peneteric	Deep pit 1	37	0	110.041	0	220.889
14	3	Sludge	Deep pit 1	37	3.532	142.134	14.1957	285.311
15	3	Sludge	Deep pit 3	37	6.675	215.733	26.8279	433.049
1	3	Control	Deep pit 1	41	9.258	83.9174	37.2093	168.451
2	3	MM	Deep pit 1	41	2.814	79.1449	11.3099	158.871
3	3	Control	Deep pit 2	41	24.755	429.598	99.4942	862.348
5	3	MM	Deep pit 3	41	0.76	119.675	3.05456	240.228
7	3	Sludge	Deep pit 2	41	31.882	665.052	128.139	1334.98
9	3	Peneteric	Deep pit 2	41	6.992	343.679	28.1019	689.88
10	3	Control	Deep pit 3	41	10.655	302.153	42.8241	606.523
11	3	MM	Deep pit 2	41	16.485	527.516	66.2558	1058.9
12	3	Peneteric	Deep pit 3	41	7.17	252.189	28.8173	506.229
13	3	Peneteric	Deep pit 1	41	1.28	92.6006	5.14452	185.881
14	3	Sludge	Deep pit 1	41	4.314	132.162	17.3386	265.294
15	3	Sludge	Deep pit 3	41	0.25	142.048	1.00479	285.138
1	3	Control	Deep pit 1	44	1.912	82.844	6.1477	133.037
2	3	MM	Deep pit 1	44	0.317	62.6809	1.01926	100.657
3	3	Control	Deep pit 2	44	21.009	323.089	67.5507	518.839
5	3	MM	Deep pit 3	44	4.536	151.749	14.5847	243.689
7	3	Sludge	Deep pit 2	44	24.24	475.803	77.9395	764.078
9	3	Peneteric	Deep pit 2	44	13.642	434.95	43.8635	698.473
10	3	Control	Deep pit 3	44	7.829	223.867	25.1728	359.501
11	3	MM	Deep pit 2	44	2.971	267.48	9.55273	429.538
12	3	Peneteric	Deep pit 3	44	7.652	246.563	24.6037	395.948
13	3	Peneteric	Deep pit 1	44	0.561	117.436	1.8038	188.587
14	3	Sludge	Deep pit 1	44	2.975	123.393	9.56559	198.153
15	3	Sludge	Deep pit 3	44	4.572	169.104	14.7005	271.559
1	3	Control	Deep pit 1	48	9.222	85.0241	29.6517	136.538
2	3	MM	Deep pit 1	48	4.91	80.6808	15.7872	129.563
3	3	Control	Deep pit 2	48	4.957	221.319	15.9384	355.41
5	3	MM	Deep pit 3	48	2.572	100.831	8.26981	161.922
7	3	Sludge	Deep pit 2	48	2.049	161.365	6.5882	259.131
9	3	Peneteric	Deep pit 2	48	2.873	218.979	9.23763	351.652
10	3	Control	Deep pit 3	48	0.556	101.028	1.78772	162.238
11	3	MM	Deep pit 2	48	5.011	231.725	16.112	372.12
12	3	Peneteric	Deep pit 3	48	2.279	125.529	7.32772	201.583
13	3	Peneteric	Deep pit 1	48	2.141	89.1058	6.88401	143.092
14	3	Sludge	Deep pit 1	48	3.62	111.1	11.6395	178.412
15	3	Sludge	Deep pit 3	48	1.575	101.447	5.06414	162.911
1	3	Control	Deep pit 1	51	4.881	77.6482	15.694	124.693
2	3	MM	Deep pit 1	51	7.739	93.0611	24.8834	149.444
3	3	Control	Deep pit 2	51	9.914	266.232	31.8767	427.534
5	3	MM	Deep pit 3	51	2.299	111.984	7.39203	179.832
7	3	Sludge	Deep pit 2	51	4.723	215.822	15.186	346.582
9	3	Peneteric	Deep pit 2	51	9.922	320.025	31.9024	513.919
10	3	Control	Deep pit 3	51	0.149	121.796	0.479083	195.589
11	3	MM	Deep pit 2	51	8.776	311.137	28.2177	499.646
12	3	Peneteric	Deep pit 3	51	1.328	139.318	4.26995	223.727
13	3	Peneteric	Deep pit 1	51	4.255	128.44	13.6812	206.258
14	3	Sludge	Deep pit 1	51	8.02	164.685	25.7869	264.463
15	3	Sludge	Deep pit 3	51	1.861	137.02	5.98372	220.036
1	3	Control	Deep pit 1	55	3.792	74.9184	12.1925	120.309
2	3	MM	Deep pit 1	55	11.961	89.5886	38.4585	143.868
3	3	Control	Deep pit 2	55	43.084	635.214	138.529	1020.07
5	3	MM	Deep pit 3	55	9.141	175.596	29.3913	281.984
7	3	Sludge	Deep pit 2	55	19.222	461.909	61.805	741.766
9	3	Peneteric	Deep pit 2	55	11.466	366.862	36.8669	589.133
10	3	Control	Deep pit 3	55	0	134.472	0	215.945
11	3	MM	Deep pit 2	55	15.904	455.332	51.1365	731.204
12	3	Peneteric	Deep pit 3	55	0.26	113.856	0.835984	182.838
13	3	Peneteric	Deep pit 1	55	11.66	366.862	37.4907	589.133
14	3	Sludge	Deep pit 1	55	4.012	120.689	12.8999	193.811
15	3	Sludge	Deep pit 3	55	1.358	133.031	4.36641	213.631
1	4	LLMO	Deep pit 1	-1	0	54	0	157.076
2	4	Control	Deep pit 3	-1	0	70	0	203.617
8	4	Control	Deep pit 1	-1	0	31	0	90.1733
11	4	LLMO	Deep pit 3	-1	0	28	0	81.4468
13	4	LLMO	Deep pit 2	-1	0	46	0	133.806
14	4	Control	Deep pit 2	-1	0	47	0	136.714
1	4	LLMO	Deep pit 1	1	0	49.9	0	145.15
2	4	Control	Deep pit 3	1	0	52.3	0	152.131
8	4	Control	Deep pit 1	1	0	25.9	0	75.3383
11	4	LLMO	Deep pit 3	1	0	31.6	0	91.9186
13	4	LLMO	Deep pit 2	1	0	41.9	0	121.879
14	4	Control	Deep pit 2	1	0	46.2	0	134.387
1	4	LLMO	Deep pit 1	5	0	10.8	0	31.4152
2	4	Control	Deep pit 3	5	0	25.7	0	74.7566
8	4	Control	Deep pit 1	5	0	32.8	0	95.4091
11	4	LLMO	Deep pit 3	5	0	41.1	0	119.552
13	4	LLMO	Deep pit 2	5	0	60	0	174.529
14	4	Control	Deep pit 2	5	0	80	0	232.705
1	4	LLMO	Deep pit 1	8	0	45.6	0	132.642
2	4	Control	Deep pit 3	8	0	52.5	0	152.713
8	4	Control	Deep pit 1	8	0	34.7	0	100.936
11	4	LLMO	Deep pit 3	8	0	29.8	0	86.6827
13	4	LLMO	Deep pit 2	8	0	45.1	0	131.188
14	4	Control	Deep pit 2	8	0	46.7	0	135.842
1	4	LLMO	Deep pit 1	12	0	47.4	0	137.878
2	4	Control	Deep pit 3	12	0	51.8	0	150.677
8	4	Control	Deep pit 1	12	0	32.6	0	94.8274
11	4	LLMO	Deep pit 3	12	0	33	0	95.9909
13	4	LLMO	Deep pit 2	12	0	48.1	0	139.914
14	4	Control	Deep pit 2	12	0	56.8	0	165.221
1	4	LLMO	Deep pit 1	15	0	45.8	0	116.508
2	4	Control	Deep pit 3	15	0	55.7	0	141.692
8	4	Control	Deep pit 1	15	0	35.1	0	89.289
11	4	LLMO	Deep pit 3	15	0	51.1	0	129.99
13	4	LLMO	Deep pit 2	15	0	53.4	0	135.841
14	4	Control	Deep pit 2	15	0	80.6	0	205.034
1	4	LLMO	Deep pit 1	19	0	51.5	0	131.008
2	4	Control	Deep pit 3	19	0	48	0	122.105
8	4	Control	Deep pit 1	19	0	26.2	0	66.6487
11	4	LLMO	Deep pit 3	19	0	35.9	0	91.324
13	4	LLMO	Deep pit 2	19	0	41.7	0	106.078
14	4	Control	Deep pit 2	19	0	52.3	0	133.043
1	4	LLMO	Deep pit 1	22	0	39.4	0	100.227
2	4	Control	Deep pit 3	22	0	33.5	0	85.2188
8	4	Control	Deep pit 1	22	0	15.5	0	39.4296
11	4	LLMO	Deep pit 3	22	0	6.02	0	15.3139
13	4	LLMO	Deep pit 2	22	0	11.3	0	28.7454
14	4	Control	Deep pit 2	22	0	38.9	0	98.9556
1	4	LLMO	Deep pit 1	26	0	35	0	89.0346
2	4	Control	Deep pit 3	26	0	43.6	0	110.912
8	4	Control	Deep pit 1	26	0	21.5	0	54.6927
11	4	LLMO	Deep pit 3	26	0	41.7	0	106.078
13	4	LLMO	Deep pit 2	26	0	53.1	0	135.078
14	4	Control	Deep pit 2	26	0	59.7	0	151.868
1	4	LLMO	Deep pit 1	29	0	51.1	0	111.34
2	4	Control	Deep pit 3	29	0	52.7	0	114.827
8	4	Control	Deep pit 1	29	0	36.4	0	79.311
11	4	LLMO	Deep pit 3	29	0	59.6	0	129.861
13	4	LLMO	Deep pit 2	29	0	81.4	0	177.36
14	4	Control	Deep pit 2	29	0	84.5	0	184.115
1	4	LLMO	Deep pit 1	33	0	51.82	0	112.909
2	4	Control	Deep pit 3	33	0	36.6	0	79.7468
8	4	Control	Deep pit 1	33	0	38.8	0	84.5403
11	4	LLMO	Deep pit 3	33	0	59.9	0	130.515
13	4	LLMO	Deep pit 2	33	0	74.2	0	161.672
14	4	Control	Deep pit 2	33	0	80	0	174.31
1	4	LLMO	Deep pit 1	36	0	54.4	0	118.531
2	4	Control	Deep pit 3	36	0	59.6	0	129.861
8	4	Control	Deep pit 1	36	0	34.4	0	74.9533
11	4	LLMO	Deep pit 3	36	0	59	0	128.554
13	4	LLMO	Deep pit 2	36	0	74	0	161.237
14	4	Control	Deep pit 2	36	0	112.7	0	245.559
1	4	LLMO	Deep pit 1	40	0	48.5	0	105.675
2	4	Control	Deep pit 3	40	0	60.9	0	132.693
8	4	Control	Deep pit 1	40	0	36.167	0	78.8033
11	4	LLMO	Deep pit 3	40	0	72.9	0	158.84
13	4	LLMO	Deep pit 2	40	0	75.2	0	163.851
14	4	Control	Deep pit 2	40	0	90.1	0	196.317
1	4	LLMO	Deep pit 1	43	0	44.78	0	81.2266
2	4	Control	Deep pit 3	43	0	61.9	0	112.281
8	4	Control	Deep pit 1	43	0	55.17	0	100.073
11	4	LLMO	Deep pit 3	43	0	69.06	0	125.268
13	4	LLMO	Deep pit 2	43	0	95.07	0	172.448
14	4	Control	Deep pit 2	43	0	109.98	0	199.493
1	4	LLMO	Deep pit 1	47	0	63.7	0	115.546
2	4	Control	Deep pit 3	47	0	51.2	0	92.8719
8	4	Control	Deep pit 1	47	0	69.6	0	126.248
11	4	LLMO	Deep pit 3	47	0	76.4	0	138.582
13	4	LLMO	Deep pit 2	47	0	96.1	0	174.316
14	4	Control	Deep pit 2	47	0	116.9	0	212.045
1	4	LLMO	Deep pit 1	50	0	46.45	0	84.2558
2	4	Control	Deep pit 3	50	0	59.68	0	108.254
8	4	Control	Deep pit 1	50	0	63.19	0	114.621
11	4	LLMO	Deep pit 3	50	0	82.04	0	148.813
13	4	LLMO	Deep pit 2	50	0	102.67	0	186.233
14	4	Control	Deep pit 2	50	0	132.89	0	241.05
1	4	LLMO	Deep pit 1	54	0	54.6	0	99.0391
2	4	Control	Deep pit 3	54	0	57.2	0	103.755
8	4	Control	Deep pit 1	54	0	57.7	0	104.662
11	4	LLMO	Deep pit 3	54	0	66.9	0	121.35
13	4	LLMO	Deep pit 2	54	0	91.4	0	165.791
14	4	Control	Deep pit 2	54	0	107.9	0	195.72

## Sheet: GHG
This speadsheet summarizes measured concentrations and fluxes for Carbon Dioxide (CO2), Methane (CH4), and Nitrous oxide (N2O).												SIDENOTE: COLUMN HEADINGS
												Manure sources	Source of manure
												Treatment	Signifies the name of product used (or the experimental control)
Simulator #	Trial	Treatment	Manure sources	Time (day)	CO₂ (ppm)	CH₄ (ppm)	N₂O (ppm)	CO₂ Flux (mg/h/m²)	CH₄ (mg/h/m²)	N₂O (mg/h/m²)		Time	The days before or after applying manure additives
1	1	Triune	Deep pit 1	2	799	42	0.226	3777.03	73.9854	1.06842			A negative value for day means time before applying any treatment
2	1	Confine	Outdoor storage	2	666	34	0.22	3148.32	59.8929	1.04006
3	1	Confine	Deep pit 2	2	578	10	0.22	2732.32	17.6156	1.04006
4	1	Triune	Deep pit 2	2	603	40	0.219	2850.5	70.4623	1.03533
5	1	MMP	Outdoor storage	2	518	30	0.205	2448.69	52.8467	0.969142
6	1	MMP	Deep pit 2	2	438	16	0.216	2070.51	28.1849	1.02115
7	1	Sulfdox	Deep pit 1	2	1223	94	0.207	5781.37	165.586	0.978597
8	1	Sulfdox	Deep pit 2	2	647	14	0.195	3058.5	24.6618	0.921867
9	1	Control	Deep pit 2	2	561	15	0.242	2651.96	26.4233	1.14406
10	1	Sulfdox	Outdoor storage	2	450	47	0.19	2127.24	82.7932	0.89823
11	1	Control	Deep pit 1	2	918	48	0.244	4339.57	84.5547	1.15352
12	1	MMP	Deep pit 1	2	1047	68	0.207	4949.38	119.786	0.978597
13	1	Control	Outdoor storage	2	433	30	0.225	2046.88	52.8467	1.06369
14	1	Triune	Outdoor storage	2	582	39	0.207	2751.23	68.7007	0.978597
15	1	Confine	Deep pit 1	2	706	52	0.221	3337.4	91.6009	1.04478
1	1	Triune	Deep pit 1	9	381	8	0.039	1801.06	14.0925	0.184373
2	1	Confine	Outdoor storage	9	510	36	0.002	2410.87	63.416	0.00945505
3	1	Confine	Deep pit 2	9	614	29	0.028	2902.5	51.0851	0.132371
4	1	Triune	Deep pit 2	9	594	27	0.013	2807.96	47.562	0.0614578
5	1	MMP	Outdoor storage	9	379	31	0	1791.61	54.6083	0
6	1	MMP	Deep pit 2	9	674	16	0	3186.13	28.1849	0
7	1	Sulfdox	Deep pit 1	9	1179	83	0	5573.37	146.209	0
8	1	Sulfdox	Deep pit 2	9	634	20	0	2997.05	35.2311	0
9	1	Control	Deep pit 2	9	734	11	0.031	3469.77	19.3771	0.146553
10	1	Sulfdox	Outdoor storage	9	475	44	0	2245.42	77.5085	0
11	1	Control	Deep pit 1	9	835	56	0.031	3947.21	98.6472	0.146553
12	1	MMP	Deep pit 1	9	942	61	0	4453.02	107.455	0
13	1	Control	Outdoor storage	9	386	25	0.022	1824.7	44.0389	0.104006
14	1	Triune	Outdoor storage	9	824	43	0.038	3895.21	75.7469	0.179646
15	1	Confine	Deep pit 1	9	692	64	0	3271.22	112.74	0
1	1	Triune	Deep pit 1	13	528	51	0.245	2495.96	89.8394	1.15824
2	1	Confine	Outdoor storage	13	417	49	0.259	1971.24	86.3163	1.22443
3	1	Confine	Deep pit 2	13	455	22	0.253	2150.88	38.7542	1.19606
4	1	Triune	Deep pit 2	13	442	25	0.258	2089.42	44.0389	1.2197
5	1	MMP	Outdoor storage	13	338	34	0.247	1597.79	59.8929	1.1677
6	1	MMP	Deep pit 2	13	469	34	0.265	2217.06	59.8929	1.25279
7	1	Sulfdox	Deep pit 1	13	771	81	0.269	3644.67	142.686	1.2717
8	1	Sulfdox	Deep pit 2	13	365	24	0.253	1725.43	42.2774	1.19606
9	1	Control	Deep pit 2	13	500	22	0.299	2363.6	38.7542	1.41353
10	1	Sulfdox	Outdoor storage	13	397	38	0.282	1876.7	66.9392	1.33316
11	1	Control	Deep pit 1	13	662	64	0.294	3129.41	112.74	1.38989
12	1	MMP	Deep pit 1	13	753	75	0.276	3559.58	132.117	1.3048
13	1	Control	Outdoor storage	13	283	30	0.261	1337.8	52.8467	1.23388
14	1	Triune	Outdoor storage	13	517	44	0.261	2443.96	77.5085	1.23388
15	1	Confine	Deep pit 1	13	568	68	0.25	2685.05	119.786	1.18188
1	1	Triune	Deep pit 1	16	917	58	0.3	3467.88	102.17	1.41826
2	1	Confine	Outdoor storage	16	521	35	0.297	1970.3	61.6545	1.40407
3	1	Confine	Deep pit 2	16	762	14	0.299	2881.7	24.6618	1.41353
4	1	Triune	Deep pit 2	16	719	13	0.305	2719.09	22.9002	1.44189
5	1	MMP	Outdoor storage	16	807	36	0.265	3051.88	63.416	1.25279
6	1	MMP	Deep pit 2	16	702	10	0.234	2654.8	17.6156	1.10624
7	1	Sulfdox	Deep pit 1	16	1007	78	0.281	3808.23	137.401	1.32843
8	1	Sulfdox	Deep pit 2	16	665	12	0.28	2514.87	21.1387	1.32371
9	1	Control	Deep pit 2	16	726	10	0.301	2745.56	17.6156	1.42298
10	1	Sulfdox	Outdoor storage	16	832	43	0.288	3146.43	75.7469	1.36153
11	1	Control	Deep pit 1	16	959	68	0.302	3626.71	119.786	1.42771
12	1	MMP	Deep pit 1	16	910	66	0.277	3441.4	116.263	1.30952
13	1	Control	Outdoor storage	16	750	24	0.293	2836.32	42.2774	1.38516
14	1	Triune	Outdoor storage	16	683	41	0.272	2582.94	72.2238	1.28589
15	1	Confine	Deep pit 1	16	971	69	0.289	3672.09	121.547	1.36625
1	1	Triune	Deep pit 1	23	1046	39	0.271	3955.72	68.7007	1.28116
2	1	Confine	Outdoor storage	23	766	37	0.267	2896.83	65.1776	1.26225
3	1	Confine	Deep pit 2	23	820	18	0.26	3101.04	31.708	1.22916
4	1	Triune	Deep pit 2	23	784	11	0.278	2964.9	19.3771	1.31425
5	1	MMP	Outdoor storage	23	806	35	0.261	3048.1	61.6545	1.23388
6	1	MMP	Deep pit 2	23	802	15	0.246	3032.97	26.4233	1.16297
7	1	Sulfdox	Deep pit 1	23	1107	64	0.269	4186.41	112.74	1.2717
8	1	Sulfdox	Deep pit 2	23	795	12	0.249	3006.5	21.1387	1.17715
9	1	Control	Deep pit 2	23	767	17	0.271	2900.61	29.9465	1.28116
10	1	Sulfdox	Outdoor storage	23	661	45	0.258	2499.74	79.27	1.2197
11	1	Control	Deep pit 1	23	1110	44	0.268	4197.76	77.5085	1.26698
12	1	MMP	Deep pit 1	23	1078	45	0.259	4076.74	79.27	1.22443
13	1	Control	Outdoor storage	23	720	26	0.273	2722.87	45.8005	1.29061
14	1	Triune	Outdoor storage	23	963	41	0.264	3641.84	72.2238	1.24807
15	1	Confine	Deep pit 1	23	830	37	0.255	3138.86	65.1776	1.20552
1	1	Triune	Deep pit 1	27	979	43	0.336	3702.34	75.7469	1.58845
2	1	Confine	Outdoor storage	27	730	40	0.331	2760.69	70.4623	1.56481
3	1	Confine	Deep pit 2	27	777	19	0.323	2938.43	33.4696	1.52699
4	1	Triune	Deep pit 2	27	746	12	0.344	2821.19	21.1387	1.62627
5	1	MMP	Outdoor storage	27	765	38	0.324	2893.05	66.9392	1.53172
6	1	MMP	Deep pit 2	27	762	16	0.307	2881.7	28.1849	1.45135
7	1	Sulfdox	Deep pit 1	27	1033	69	0.334	3906.56	121.547	1.57899
8	1	Sulfdox	Deep pit 2	27	755	13	0.31	2855.23	22.9002	1.46553
9	1	Control	Deep pit 2	27	731	18	0.336	2764.47	31.708	1.58845
10	1	Sulfdox	Outdoor storage	27	636	49	0.321	2405.2	86.3163	1.51754
11	1	Control	Deep pit 1	27	1036	48	0.333	3917.9	84.5547	1.57427
12	1	MMP	Deep pit 1	27	1008	49	0.323	3812.02	86.3163	1.52699
13	1	Control	Outdoor storage	27	668	28	0.339	2526.22	49.3236	1.60263
14	1	Triune	Outdoor storage	27	905	45	0.328	3422.49	79.27	1.55063
15	1	Confine	Deep pit 1	27	787	40	0.317	2976.25	70.4623	1.49863
1	1	Triune	Deep pit 1	30	1048	38	0.405	2972.46	66.9392	1.91465
2	1	Confine	Outdoor storage	30	776	35	0.399	2200.99	61.6545	1.88628
3	1	Confine	Deep pit 2	30	828	17	0.39	2348.47	29.9465	1.84373
4	1	Triune	Deep pit 2	30	793	10	0.414	2249.2	17.6156	1.95719
5	1	MMP	Outdoor storage	30	815	34	0.391	2311.6	59.8929	1.84846
6	1	MMP	Deep pit 2	30	811	14	0.372	2300.26	24.6618	1.75864
7	1	Sulfdox	Deep pit 1	30	1107	62	0.403	3139.81	109.217	1.90519
8	1	Sulfdox	Deep pit 2	30	804	11	0.376	2280.4	19.3771	1.77755
9	1	Control	Deep pit 2	30	777	16	0.404	2203.82	28.1849	1.90992
10	1	Sulfdox	Outdoor storage	30	674	43	0.388	1911.68	75.7469	1.83428
11	1	Control	Deep pit 1	30	1111	42	0.401	3151.15	73.9854	1.89574
12	1	MMP	Deep pit 1	30	1080	43	0.39	3063.23	75.7469	1.84373
13	1	Control	Outdoor storage	30	731	25	0.408	2073.35	44.0389	1.92883
14	1	Triune	Outdoor storage	30	968	40	0.396	2745.56	70.4623	1.8721
15	1	Confine	Deep pit 1	30	839	36	0.383	2379.67	63.416	1.81064
1	1	Triune	Deep pit 1	32	997	39	0.319	2827.81	68.7007	1.50808
2	1	Confine	Outdoor storage	32	676	34	0.287	1917.35	59.8929	1.3568
3	1	Confine	Deep pit 2	32	696	12	0.285	1974.08	21.1387	1.34734
4	1	Triune	Deep pit 2	32	673	49	0.305	1908.84	86.3163	1.44189
5	1	MMP	Outdoor storage	32	599	24	0.292	1698.96	42.2774	1.38044
6	1	MMP	Deep pit 2	32	634	16	0.295	1798.23	28.1849	1.39462
7	1	Sulfdox	Deep pit 1	32	902	44	0.304	2558.36	77.5085	1.43717
8	1	Sulfdox	Deep pit 2	32	757	10	0.296	2147.1	17.6156	1.39935
9	1	Control	Deep pit 2	32	723	15	0.296	2050.66	26.4233	1.39935
10	1	Sulfdox	Outdoor storage	32	582	26	0.287	1650.74	45.8005	1.3568
11	1	Control	Deep pit 1	32	861	42	0.313	2442.07	73.9854	1.47971
12	1	MMP	Deep pit 1	32	1031	35	0.311	2924.25	61.6545	1.47026
13	1	Control	Outdoor storage	32	654	22	0.298	1854.95	38.7542	1.4088
14	1	Triune	Outdoor storage	32	659	24	0.287	1869.14	42.2774	1.3568
15	1	Confine	Deep pit 1	32	801	36	0.308	2271.89	63.416	1.45608
1	1	Triune	Deep pit 1	40	917	62	0.298	2600.91	109.217	1.4088
2	1	Confine	Outdoor storage	40	687	63	0.297	1948.55	110.978	1.40407
3	1	Confine	Deep pit 2	40	864	27	0.31	2450.58	47.562	1.46553
4	1	Triune	Deep pit 2	40	765	29	0.301	2169.79	51.0851	1.42298
5	1	MMP	Outdoor storage	40	856	82	0.295	2427.89	144.448	1.39462
6	1	MMP	Deep pit 2	40	651	21	0.285	1846.44	36.9927	1.34734
7	1	Sulfdox	Deep pit 1	40	981	82	0.263	2782.43	144.448	1.24334
8	1	Sulfdox	Deep pit 2	40	716	21	0.277	2030.81	36.9927	1.30952
9	1	Control	Deep pit 2	40	698	53	0.309	1979.75	93.3625	1.4608
10	1	Sulfdox	Outdoor storage	40	528	66	0.282	1497.58	116.263	1.33316
11	1	Control	Deep pit 1	40	904	55	0.325	2564.03	96.8856	1.53645
12	1	MMP	Deep pit 1	40	1235	89	0.295	3502.86	156.779	1.39462
13	1	Control	Outdoor storage	40	771	60	0.304	2186.8	105.693	1.43717
14	1	Triune	Outdoor storage	40	964	93	0.287	2734.21	163.825	1.3568
15	1	Confine	Deep pit 1	40	1060	79	0.298	3006.5	139.163	1.4088
1	1	Triune	Deep pit 1	44	1184	40	0.324	2238.8	70.4623	1.53172
2	1	Confine	Outdoor storage	44	705	50	0.317	1333.07	88.0778	1.49863
3	1	Confine	Deep pit 2	44	739	16	0.288	1397.36	28.1849	1.36153
4	1	Triune	Deep pit 2	44	804	12	0.298	1520.27	21.1387	1.4088
5	1	MMP	Outdoor storage	44	1185	124	0.299	2240.69	218.433	1.41353
6	1	MMP	Deep pit 2	44	772	19	0.273	1459.76	33.4696	1.29061
7	1	Sulfdox	Deep pit 1	44	1685	92	0.289	3186.13	162.063	1.36625
8	1	Sulfdox	Deep pit 2	44	943	17	0.299	1783.1	29.9465	1.41353
9	1	Control	Deep pit 2	44	741	30	0.33	1401.14	52.8467	1.56008
10	1	Sulfdox	Outdoor storage	44	779	55	0.287	1473	96.8856	1.3568
11	1	Control	Deep pit 1	44	1633	30	0.338	3087.81	52.8467	1.5979
12	1	MMP	Deep pit 1	44	1230	49	0.298	2325.78	86.3163	1.4088
13	1	Control	Outdoor storage	44	900	41	0.301	1701.79	72.2238	1.42298
14	1	Triune	Outdoor storage	44	701	44	0.305	1325.51	77.5085	1.44189
15	1	Confine	Deep pit 1	44	1484	57	0.289	2806.07	100.409	1.36625
1	1	Triune	Deep pit 1	51	1477	97	0.225	2792.83	170.871	1.06369
2	1	Confine	Outdoor storage	51	972	124	0.242	1837.94	218.433	1.14406
3	1	Confine	Deep pit 2	51	1116	78	0.232	2110.22	137.401	1.09679
4	1	Triune	Deep pit 2	51	1008	26	0.198	1906.01	45.8005	0.93605
5	1	MMP	Outdoor storage	51	820	46	0.221	1550.52	81.0316	1.04478
6	1	MMP	Deep pit 2	51	939	33	0.207	1775.54	58.1314	0.978597
7	1	Sulfdox	Deep pit 1	51	1527	135	0.213	2887.37	237.81	1.00696
8	1	Sulfdox	Deep pit 2	51	1060	49	0.211	2004.33	86.3163	0.997508
9	1	Control	Deep pit 2	51	1048	56	0.236	1981.64	98.6472	1.1157
10	1	Sulfdox	Outdoor storage	51	779	100	0.209	1473	176.156	0.988053
11	1	Control	Deep pit 1	51	1469	74	0.24	2777.7	130.355	1.13461
12	1	MMP	Deep pit 1	51	1177	91	0.234	2225.57	160.302	1.10624
13	1	Control	Outdoor storage	51	1063	98	0.235	2010.01	172.633	1.11097
14	1	Triune	Outdoor storage	51	1253	126	0.213	2369.27	221.956	1.00696
15	1	Confine	Deep pit 1	51	1465	105	0.215	2770.14	184.963	1.01642
1	2	Control	Deep pit 1	3	779.901	138.275	0.236558	3686.75	653.654	1.11826
2	2	Control	Deep pit 2	3	734.854	11.2469	0.216548	3473.8	53.1665	1.02366
3	2	WW	Deep pit 3	3	704.74	91.6709	0.23634	3331.45	433.347	1.11723
4	2	MTM	Deep pit 1	3	743.444	95.7646	0.220897	3514.41	452.699	1.04423
5	2	Enviro	Deep pit 1	3	797.255	137.335	0.263527	3768.78	649.21	1.24575
6	2	MTM	Deep pit 2	3	720.716	10.6238	0.288975	3406.97	50.221	1.36604
7	2	Oxydol	Deep pit 2	3	699.678	10.2522	0.261352	3307.52	48.4642	1.23547
8	2	Oxydol	Deep pit 3	3	736.972	91.6081	0.248737	3483.82	433.05	1.17583
9	2	MTM	Deep pit 3	3	661.944	84.1135	0.208065	3129.14	397.622	0.983565
10	2	WW	Deep pit 1	3	711.709	117.859	0.247867	3364.39	557.145	1.17172
11	2	Control	Deep pit 3	3	679.559	85.0678	0.222638	3212.41	402.133	1.05245
12	2	Enviro	Deep pit 3	3	727.612	92.9581	0.272445	3439.57	439.432	1.2879
13	2	Oxydol	Deep pit 1	3	792.647	220.451	0.22938	3747	1042.12	1.08433
14	2	Enviro	Deep pit 2	3	751.536	12.6877	0.292672	3552.66	59.9772	1.38352
15	2	WW	Deep pit 2	3	689.508	8.97726	0.23634	3259.44	42.4373	1.11723
1	2	Control	Deep pit 1	10	717.442	84.6414	0.26451	2713.19	320.093	1.00031
2	2	Control	Deep pit 2	10	663.556	8.86314	0.282283	2509.41	33.5183	1.06753
3	2	WW	Deep pit 3	10	673.664	80.0086	0.269499	2547.64	302.573	1.01918
4	2	MTM	Deep pit 1	10	729.324	198.82	0.246426	2758.13	751.888	0.931923
5	2	Enviro	Deep pit 1	10	715.447	119.738	0.284465	2705.65	452.822	1.07578
6	2	MTM	Deep pit 2	10	705.925	10.4109	0.266693	2669.64	39.3714	1.00857
7	2	Oxydol	Deep pit 2	10	689.23	10.8305	0.283218	2606.51	40.9582	1.07106
8	2	Oxydol	Deep pit 3	10	703.247	72.3592	0.266693	2659.51	273.645	1.00857
9	2	MTM	Deep pit 3	10	677.742	70.9298	0.248608	2563.06	268.24	0.940177
10	2	WW	Deep pit 1	10	625.359	86.911	0.284153	2364.96	328.677	1.0746
11	2	Control	Deep pit 3	10	644.01	67.8833	0.252038	2435.49	256.719	0.953148
12	2	Enviro	Deep pit 3	10	718.358	94.748	0.307227	2716.66	358.314	1.16186
13	2	Oxydol	Deep pit 1	10	703.247	93.2062	0.249544	2659.51	352.483	0.943714
14	2	Enviro	Deep pit 2	10	755.647	12.4796	0.307227	2857.67	47.1947	1.16186
15	2	WW	Deep pit 2	10	638.384	9.6016	0.315022	2414.22	36.311	1.19134
1	2	Control	Deep pit 1	17	727.352	131.228	0.27449	2750.67	496.272	1.03806
2	2	Control	Deep pit 2	17	733.566	7.53076	0.295566	2774.17	28.4795	1.11776
3	2	WW	Deep pit 3	17	673.051	103.184	0.282723	2545.32	390.219	1.06919
4	2	MTM	Deep pit 1	17	715.831	126.734	0.248476	2707.1	479.276	0.939676
5	2	Enviro	Deep pit 1	17	771.801	169.148	0.319275	2918.77	639.676	1.20742
6	2	MTM	Deep pit 2	17	737.717	7.3141	0.277454	2789.87	27.6602	1.04927
7	2	Oxydol	Deep pit 2	17	772.983	8.54243	0.267904	2923.24	32.3055	1.01315
8	2	Oxydol	Deep pit 3	17	746.092	98.1604	0.285357	2821.54	371.219	1.07915
9	2	MTM	Deep pit 3	17	713.628	85.6225	0.284699	2698.77	323.804	1.07666
10	2	WW	Deep pit 1	17	720.601	179.768	0.31236	2725.14	679.841	1.18127
11	2	Control	Deep pit 3	17	715.894	101.447	0.299846	2707.34	383.649	1.13395
12	2	Enviro	Deep pit 3	17	741.724	122.827	0.310055	2805.02	464.502	1.17255
13	2	Oxydol	Deep pit 1	17	750.516	168.94	0.301493	2838.27	638.891	1.14017
14	2	Enviro	Deep pit 2	17	753.282	7.88709	0.272515	2848.73	29.8271	1.03059
15	2	WW	Deep pit 2	17	710.285	7.8813	0.338704	2686.13	29.8052	1.2809
1	2	Control	Deep pit 1	24	709.062	103.541	0.296052	2681.5	391.566	1.1196
2	2	Control	Deep pit 2	24	682.233	9.89238	0.304522	2580.04	37.4106	1.15163
3	2	WW	Deep pit 3	24	666.857	63.4373	0.27979	2521.89	239.905	1.0581
4	2	MTM	Deep pit 1	24	710.306	157.093	0.308249	2686.21	594.087	1.16572
5	2	Enviro	Deep pit 1	24	698.561	134.923	0.285211	2641.79	510.248	1.0786
6	2	MTM	Deep pit 2	24	691.976	9.19762	0.294358	2616.89	34.7832	1.11319
7	2	Oxydol	Deep pit 2	24	693.428	9.43391	0.323156	2622.38	35.6768	1.2221
8	2	Oxydol	Deep pit 3	24	700.589	97.5442	0.271659	2649.46	368.889	1.02735
9	2	MTM	Deep pit 3	24	695.729	77.2662	0.309266	2631.08	292.202	1.16957
10	2	WW	Deep pit 1	24	704.743	145.972	0.266916	2665.17	552.032	1.00941
11	2	Control	Deep pit 3	24	700.99	71.4505	0.271659	2650.98	270.209	1.02735
12	2	Enviro	Deep pit 3	24	710.026	74.1286	0.28555	2685.15	280.337	1.07988
13	2	Oxydol	Deep pit 1	24	670.492	111.705	0.271659	2535.64	422.442	1.02735
14	2	Enviro	Deep pit 2	24	720.506	9.58777	0.329932	2724.78	36.2587	1.24773
15	2	WW	Deep pit 2	24	694.948	10.5747	0.321801	2628.13	39.9911	1.21698
1	2	Control	Deep pit 1	31	902.895	148.668	0.179106	2560.9	421.671	0.508002
2	2	Control	Deep pit 2	31	1002.79	8.46251	0.204163	2844.24	24.0024	0.579073
3	2	WW	Deep pit 3	31	736.982	128.333	0.146001	2090.32	363.993	0.414106
4	2	MTM	Deep pit 1	31	808.829	176.162	0.167218	2294.1	499.652	0.474283
5	2	Enviro	Deep pit 1	31	864.247	213.442	0.177643	2451.28	605.389	0.503852
6	2	MTM	Deep pit 2	31	986.488	7.42715	0.218612	2798	21.0658	0.620055
7	2	Oxydol	Deep pit 2	31	871.576	9.51218	0.198128	2472.07	26.9796	0.561954
8	2	Oxydol	Deep pit 3	31	845.378	126.83	0.173985	2397.76	359.731	0.493477
9	2	MTM	Deep pit 3	31	817.87	110.819	0.154415	2319.74	314.317	0.437969
10	2	WW	Deep pit 1	31	790.786	162.423	0.167766	2242.92	460.682	0.475839
11	2	Control	Deep pit 3	31	815.176	80.5445	0.14783	2312.1	228.45	0.419294
12	2	Enviro	Deep pit 3	31	855.88	124.093	0.125882	2427.55	351.967	0.357042
13	2	Oxydol	Deep pit 1	31	719.959	110.424	0.137039	2042.04	313.198	0.388687
14	2	Enviro	Deep pit 2	31	726.618	6.54774	0.174716	2060.92	18.5715	0.495552
15	2	WW	Deep pit 2	31	776.474	7.49447	0.171973	2202.33	21.2567	0.487771
1	2	Control	Deep pit 1	38	808.134	174.109	0.285177	2292.13	493.829	0.808855
2	2	Control	Deep pit 2	38	817.61	11.075	0.280081	2319	31.4124	0.794401
3	2	WW	Deep pit 3	38	731.726	110.687	0.291547	2075.41	313.944	0.826922
4	2	MTM	Deep pit 1	38	768.685	159.649	0.245684	2180.24	452.816	0.696837
5	2	Enviro	Deep pit 1	38	788.516	189.503	0.296325	2236.48	537.491	0.840473
6	2	MTM	Deep pit 2	38	817.955	10.8226	0.297917	2319.98	30.6964	0.84499
7	2	Oxydol	Deep pit 2	38	806.273	12.0477	0.273074	2286.85	34.1711	0.774527
8	2	Oxydol	Deep pit 3	38	882.491	142.8	0.265112	2503.03	405.026	0.751943
9	2	MTM	Deep pit 3	38	799.591	117.43	0.314161	2267.9	333.068	0.891061
10	2	WW	Deep pit 1	38	774.62	221.457	0.270526	2197.07	628.123	0.7673
11	2	Control	Deep pit 3	38	812.154	110.487	0.246958	2303.53	313.377	0.700451
12	2	Enviro	Deep pit 3	38	768.749	98.1011	0.265749	2180.42	278.246	0.753749
13	2	Oxydol	Deep pit 1	38	852.456	175.915	0.282629	2417.84	498.952	0.801628
14	2	Enviro	Deep pit 2	38	818.476	11.3323	0.314798	2321.46	32.1422	0.892868
15	2	WW	Deep pit 2	38	790.072	12.1091	0.287407	2240.9	34.3452	0.815179
1	2	Control	Deep pit 1	45	813.323	208.554	0.264109	2306.85	591.525	0.749098
2	2	Control	Deep pit 2	45	772.095	8.26401	0.244588	2189.91	23.4394	0.69373
3	2	WW	Deep pit 3	45	668.782	118.333	0.208679	1896.88	335.631	0.591881
4	2	MTM	Deep pit 1	45	821.98	110.582	0.221693	2331.4	313.647	0.628793
5	2	Enviro	Deep pit 1	45	831.73	257.573	0.217837	2359.05	730.559	0.617856
6	2	MTM	Deep pit 2	45	879.223	7.7094	0.277846	2493.76	21.8663	0.78806
7	2	Oxydol	Deep pit 2	45	743.964	11.8328	0.268688	2110.12	33.5616	0.762085
8	2	Oxydol	Deep pit 3	45	800.082	139.237	0.212053	2269.29	394.92	0.60145
9	2	MTM	Deep pit 3	45	778.327	130.164	0.198798	2207.59	369.187	0.563855
10	2	WW	Deep pit 1	45	762.662	276.878	0.22097	2163.15	785.316	0.626742
11	2	Control	Deep pit 3	45	836.918	153.064	0.194219	2373.77	434.139	0.550867
12	2	Enviro	Deep pit 3	45	857.548	159.167	0.214463	2432.28	451.448	0.608286
13	2	Oxydol	Deep pit 1	45	832.927	271.07	0.233984	2362.45	768.842	0.663654
14	2	Enviro	Deep pit 2	45	713.035	7.0455	0.278328	2022.4	19.9833	0.789428
15	2	WW	Deep pit 2	45	974.337	9.4699	0.251336	2763.53	26.8597	0.71287
1	2	Control	Deep pit 1	52	1108.34	456.292	0.233797	2095.73	862.794	0.442082
2	2	Control	Deep pit 2	52	1057.44	19.1966	0.254021	1999.5	36.2985	0.480323
3	2	WW	Deep pit 3	52	895.652	208.03	0.225416	1693.57	393.359	0.426234
4	2	MTM	Deep pit 1	52	1039.33	439.008	0.224322	1965.24	830.112	0.424167
5	2	Enviro	Deep pit 1	52	1176.37	557.243	0.235254	2224.37	1053.68	0.444838
6	2	MTM	Deep pit 2	52	929.32	17.9429	0.263495	1757.23	33.9279	0.498238
7	2	Oxydol	Deep pit 2	52	934.304	28.7806	0.26222	1766.66	54.4206	0.495827
8	2	Oxydol	Deep pit 3	52	1022.73	152.091	0.211022	1933.87	287.586	0.399017
9	2	MTM	Deep pit 3	52	1079.77	242.438	0.214301	2041.72	458.422	0.405218
10	2	WW	Deep pit 1	52	1120.46	531.955	0.230699	2118.65	1005.86	0.436225
11	2	Control	Deep pit 3	52	983.573	165.529	0.207196	1859.82	312.997	0.391782
12	2	Enviro	Deep pit 3	52	1013.72	190.038	0.190615	1916.83	359.34	0.360431
13	2	Oxydol	Deep pit 1	52	1287.89	559.325	0.206467	2435.24	1057.62	0.390404
14	2	Enviro	Deep pit 2	52	981.179	16.2478	0.235254	1855.29	30.7227	0.444838
15	2	WW	Deep pit 2	52	1001.53	23.0054	0.241996	1893.78	43.5005	0.457585
1	3	Control	Deep pit 1	-4	2366.38	843.654	0.33435	11186.4	3988.12	1.58054
2	3	MM	Deep pit 1	-4	2267.84	1201.34	0.33873	10720.5	5678.96	1.60125
3	3	Control	Deep pit 2	-4	1197.2	561.049	0.323619	5659.43	2652.19	1.52981
5	3	MM	Deep pit 3	-4	1082.11	374.979	0.312888	5115.34	1772.6	1.47908
7	3	Sludge	Deep pit 2	-4	1168.4	981.657	0.328437	5523.28	4640.49	1.55259
9	3	Peneteric	Deep pit 2	-4	1164.19	1140.78	0.291207	5503.35	5392.7	1.37659
10	3	Control	Deep pit 3	-4	1022.61	307.986	0.313326	4834.1	1455.91	1.48116
11	3	MM	Deep pit 2	-4	1140.88	966.169	0.319458	5393.19	4567.27	1.51014
12	3	Peneteric	Deep pit 3	-4	1088.93	434.083	0.319896	5147.61	2052	1.51221
13	3	Peneteric	Deep pit 1	-4	2280.89	731.208	0.306975	10782.2	3456.57	1.45113
14	3	Sludge	Deep pit 1	-4	1083.73	422.301	0.291645	5123.02	1996.3	1.37866
15	3	Sludge	Deep pit 3	-4	1121.85	447.819	0.30588	5303.21	2116.93	1.44596
1	3	Control	Deep pit 1	2	1196.17	551.935	0.250461	4523.62	2087.29	0.947184
2	3	MM	Deep pit 1	2	1435.94	597.058	0.21893	5430.4	2257.93	0.827939
3	3	Control	Deep pit 2	2	1061.15	416.653	0.233262	4013.03	1575.68	0.882141
5	3	MM	Deep pit 3	2	797.251	172.032	0.229122	3015.01	650.585	0.866483
7	3	Sludge	Deep pit 2	2	934.844	622.324	0.240906	3535.36	2353.48	0.911049
9	3	Peneteric	Deep pit 2	2	1038.73	836.48	0.228485	3928.25	3163.37	0.864074
10	3	Control	Deep pit 3	2	844.72	243.495	0.240906	3194.53	920.84	0.911049
11	3	MM	Deep pit 2	2	1033.16	913.529	0.25906	3907.16	3454.75	0.979705
12	3	Peneteric	Deep pit 3	2	804.673	249.077	0.23167	3043.08	941.948	0.876119
13	3	Peneteric	Deep pit 1	2	1356.53	874.58	0.233262	5130.08	3307.45	0.882141
14	3	Sludge	Deep pit 1	2	1436.06	778.208	0.238039	5430.84	2943	0.900209
15	3	Sludge	Deep pit 3	2	880.853	264.702	0.198546	3331.17	1001.04	0.750852
1	3	Control	Deep pit 1	9	2104.81	477.363	0.311613	7959.9	1805.27	1.17845
2	3	MM	Deep pit 1	9	2069.67	896.982	0.238676	7827.01	3392.17	0.902618
3	3	Control	Deep pit 2	9	1264.66	599.065	0.250142	4782.63	2265.52	0.945979
5	3	MM	Deep pit 3	9	1316.67	466.605	0.233899	4979.33	1764.59	0.88455
7	3	Sludge	Deep pit 2	9	1314.96	599.31	0.217974	4972.85	2266.45	0.824326
9	3	Peneteric	Deep pit 2	9	1495.71	957.262	0.217656	5656.42	3620.14	0.823121
10	3	Control	Deep pit 3	9	1001.87	386.574	0.23167	3788.82	1461.93	0.876119
11	3	MM	Deep pit 2	9	2093.91	1542.2	0.23358	7918.67	5832.22	0.883346
12	3	Peneteric	Deep pit 3	9	1016	442.194	0.229	3842.26	1672.27	0.866023
13	3	Peneteric	Deep pit 1	9	3157.06	1606.47	0.231033	11939.3	6075.29	0.87371
14	3	Sludge	Deep pit 1	9	2336.18	867.033	0.258742	8834.88	3278.91	0.978501
15	3	Sludge	Deep pit 3	9	1196.17	551.935	0.250461	4523.62	2087.29	0.947184
1	3	Control	Deep pit 1	16	2653.6	1525.33	0.299254	10035.3	5768.42	1.13171
2	3	MM	Deep pit 1	16	2510.95	1860.07	0.295518	9495.82	7034.36	1.11758
3	3	Control	Deep pit 2	16	1233.44	686.933	0.294397	4664.57	2597.82	1.11334
5	3	MM	Deep pit 3	16	950.622	504.557	0.28487	3595.03	1908.11	1.07731
7	3	Sludge	Deep pit 2	16	1186.85	659.096	0.28076	4488.39	2492.54	1.06177
9	3	Peneteric	Deep pit 2	16	1274.7	793.683	0.279826	4820.6	3001.52	1.05824
10	3	Control	Deep pit 3	16	923.653	386.89	0.28487	3493.04	1463.13	1.07731
11	3	MM	Deep pit 2	16	1118.43	561.46	0.271234	4229.62	2123.31	1.02574
12	3	Peneteric	Deep pit 3	16	986.103	551.891	0.263201	3729.21	2087.12	0.995364
13	3	Peneteric	Deep pit 1	16	1306.35	450.992	0.254422	4940.3	1705.54	0.962162
14	3	Sludge	Deep pit 1	16	1710.46	593.03	0.25162	6468.54	2242.7	0.951565
15	3	Sludge	Deep pit 3	16	960.885	534.381	0.256663	3633.84	2020.9	0.970639
1	3	Control	Deep pit 1	23	2165.35	526.205	0.298574	6141.63	1492.49	0.846853
2	3	MM	Deep pit 1	23	1986.65	757.829	0.285163	5634.78	2149.45	0.808814
3	3	Control	Deep pit 2	23	1274.36	480.821	0.27333	3614.5	1363.76	0.775251
5	3	MM	Deep pit 3	23	1075.38	463.806	0.260595	3050.13	1315.5	0.73913
7	3	Sludge	Deep pit 2	23	1254.71	519.385	0.247634	3558.77	1473.14	0.70237
9	3	Peneteric	Deep pit 2	23	1340.8	768.588	0.242112	3802.95	2179.96	0.686707
10	3	Control	Deep pit 3	23	990.98	605.602	0.247972	2810.74	1717.68	0.703329
11	3	MM	Deep pit 2	23	1155.99	442.363	0.205484	3278.76	1254.68	0.582819
12	3	Peneteric	Deep pit 3	23	1102.53	644.972	0.222953	3127.14	1829.35	0.632366
13	3	Peneteric	Deep pit 1	23	1785	1452.11	0.240421	5062.84	4118.66	0.681912
14	3	Sludge	Deep pit 1	23	1776.58	709.916	0.230616	5038.96	2013.55	0.654102
15	3	Sludge	Deep pit 3	23	1116.33	644.282	0.222277	3166.28	1827.39	0.630448
1	3	Control	Deep pit 1	30	1809.71	185.075	1.3196	5132.91	524.932	3.74281
2	3	MM	Deep pit 1	30	1578.3	188.026	1.3211	4476.58	533.303	3.74707
3	3	Control	Deep pit 2	30	1341.31	219.201	1.28504	3804.38	621.725	3.6448
5	3	MM	Deep pit 3	30	1034.1	157.208	1.2734	2933.05	445.892	3.61177
7	3	Sludge	Deep pit 2	30	1362.26	193.773	1.30082	3863.8	549.603	3.68954
9	3	Peneteric	Deep pit 2	30	1690.56	299.73	1.27828	4794.96	850.13	3.62562
10	3	Control	Deep pit 3	30	1088.94	219.194	1.25237	3088.59	621.704	3.55212
11	3	MM	Deep pit 2	30	1436.55	215.859	1.25011	4074.52	612.245	3.54572
12	3	Peneteric	Deep pit 3	30	1167.93	239.553	1.21218	3312.62	679.448	3.43813
13	3	Peneteric	Deep pit 1	30	1789.06	202.756	1.1949	5074.34	575.082	3.38912
14	3	Sludge	Deep pit 1	30	1700.38	185.809	1.20129	4822.83	527.015	3.40723
15	3	Sludge	Deep pit 3	30	1117.29	331.905	1.08523	3168.98	941.39	3.07805
1	3	Control	Deep pit 1	37	1196.23	562.323	0.263238	3392.89	1594.93	0.746629
2	3	MM	Deep pit 1	37	1075.16	444.204	0.255914	3049.5	1259.9	0.725853
3	3	Control	Deep pit 2	37	1054.29	482.979	0.255074	2990.3	1369.88	0.723473
5	3	MM	Deep pit 3	37	924.765	620.728	0.233634	2622.93	1760.58	0.662661
7	3	Sludge	Deep pit 2	37	1275.12	718.275	0.230201	3616.65	2037.26	0.652923
9	3	Peneteric	Deep pit 2	37	1453.01	1062.47	0.220587	4121.21	3013.49	0.625655
10	3	Control	Deep pit 3	37	957.219	726.151	0.218679	2714.98	2059.6	0.620244
11	3	MM	Deep pit 2	37	1067.22	806.596	0.213796	3026.99	2287.76	0.606394
12	3	Peneteric	Deep pit 3	37	955.942	764.726	0.200367	2711.36	2169.01	0.568306
13	3	Peneteric	Deep pit 1	37	1479.15	742.977	0.208913	4195.35	2107.32	0.592544
14	3	Sludge	Deep pit 1	37	1159.78	451.768	0.202885	3289.5	1281.36	0.575447
15	3	Sludge	Deep pit 3	37	1192.88	923.337	0.206471	3383.4	2618.88	0.585619
1	3	Control	Deep pit 1	44	881.229	276.092	0.306982	1666.3	522.058	0.580467
2	3	MM	Deep pit 1	44	801.608	263.621	0.291159	1515.74	498.475	0.550547
3	3	Control	Deep pit 2	44	711.605	146.107	0.318537	1345.56	276.27	0.602316
5	3	MM	Deep pit 3	44	642.461	284.899	0.267008	1214.82	538.71	0.50488
7	3	Sludge	Deep pit 2	44	612.643	126.222	0.266383	1158.43	238.671	0.503699
9	3	Peneteric	Deep pit 2	44	667.317	170.494	0.263885	1261.82	322.384	0.498975
10	3	Control	Deep pit 3	44	647.732	134.945	0.261491	1224.78	255.166	0.494447
11	3	MM	Deep pit 2	44	993.542	317.385	0.261074	1878.67	600.137	0.49366
12	3	Peneteric	Deep pit 3	44	867.13	570.248	0.247541	1639.64	1078.27	0.468071
13	3	Peneteric	Deep pit 1	44	893.385	287.496	0.239005	1689.28	543.62	0.45193
14	3	Sludge	Deep pit 1	44	860.672	259.658	0.241087	1627.43	490.982	0.455867
15	3	Sludge	Deep pit 3	44	735.561	367.273	0.223806	1390.86	694.47	0.423191
1	3	Control	Deep pit 1	51	810.721	197.523	0.682851	1532.98	373.493	1.29119
2	3	MM	Deep pit 1	51	1108.48	676.163	0.703775	2096.01	1278.54	1.33076
3	3	Control	Deep pit 2	51	1007.5	353.604	0.67075	1905.07	668.622	1.26831
5	3	MM	Deep pit 3	51	952.19	819.101	0.648313	1800.48	1548.82	1.22588
7	3	Sludge	Deep pit 2	51	940.974	342.845	0.612515	1779.27	648.279	1.15819
9	3	Peneteric	Deep pit 2	51	1044.99	466.647	0.594112	1975.95	882.373	1.12339
10	3	Control	Deep pit 3	51	763.285	500.458	0.588314	1443.28	946.307	1.11243
11	3	MM	Deep pit 2	51	899.398	289.801	0.592347	1700.66	547.978	1.12006
12	3	Peneteric	Deep pit 3	51	633.903	335.488	0.556045	1198.63	634.367	1.05141
13	3	Peneteric	Deep pit 1	51	1045.66	348.208	0.552515	1977.22	658.42	1.04474
14	3	Sludge	Deep pit 1	51	817.881	204.62	0.533104	1546.52	386.913	1.00804
15	3	Sludge	Deep pit 3	51	661.214	349.996	0.5326	1250.28	661.801	1.00708
1	4	LLMO	Deep pit 1	-4	785.554	151.856	0.366419	3713.47	717.852	1.73214
2	4	Control	Deep pit 3	-4	611.875	67.8412	0.366902	2892.46	320.699	1.73442
8	4	Control	Deep pit 1	-4	994.569	255.707	0.318394	4701.53	1208.78	1.50511
11	4	LLMO	Deep pit 3	-4	702.136	94.1619	0.307781	3319.14	445.122	1.45494
13	4	LLMO	Deep pit 2	-4	790.868	111.781	0.305315	3738.59	528.409	1.44329
14	4	Control	Deep pit 2	-4	833.083	86.9559	0.297758	3938.15	411.058	1.40756
1	4	LLMO	Deep pit 1	3	729.552	431.451	0.354373	2758.99	1631.64	1.34015
2	4	Control	Deep pit 3	3	513.317	59.9839	0.340066	1941.24	226.845	1.28605
8	4	Control	Deep pit 1	3	900.926	411.373	0.304918	3407.09	1555.72	1.15313
11	4	LLMO	Deep pit 3	3	534.098	43.0821	0.295904	2019.83	162.926	1.11904
13	4	LLMO	Deep pit 2	3	512.316	47.2529	0.299295	1937.46	178.699	1.13186
14	4	Control	Deep pit 2	3	877.153	49.3713	0.303678	3317.18	186.71	1.14844
1	4	LLMO	Deep pit 1	10	703.648	313.259	0.353265	2661.03	1184.67	1.33596
2	4	Control	Deep pit 3	10	647.359	71.2055	0.348045	2448.16	269.282	1.31622
8	4	Control	Deep pit 1	10	743.04	189.778	0.310043	2810	717.694	1.17251
11	4	LLMO	Deep pit 3	10	664.538	78.3507	0.334264	2513.13	296.304	1.26411
13	4	LLMO	Deep pit 2	10	674.682	75.1677	0.31401	2551.49	284.266	1.18751
14	4	Control	Deep pit 2	10	648.185	64.6419	0.297306	2451.28	244.46	1.12434
1	4	LLMO	Deep pit 1	17	684.247	177.603	0.308416	2587.66	671.654	1.16636
2	4	Control	Deep pit 3	17	625.319	55.1096	0.30745	2364.81	208.411	1.1627
8	4	Control	Deep pit 1	17	747.524	140.237	0.292591	2826.96	530.345	1.10651
11	4	LLMO	Deep pit 3	17	611.105	83.7525	0.279424	2311.05	316.732	1.05671
13	4	LLMO	Deep pit 2	17	593.571	48.5635	0.276042	2244.74	183.656	1.04392
14	4	Control	Deep pit 2	17	563.217	40.7569	0.279907	2129.95	154.133	1.05854
1	4	LLMO	Deep pit 1	24	635.202	142.529	0.348228	1801.64	404.258	0.987687
2	4	Control	Deep pit 3	24	587.376	51.1915	0.345479	1665.99	145.196	0.979889
8	4	Control	Deep pit 1	24	611.672	88.2034	0.317552	1734.9	250.173	0.900679
11	4	LLMO	Deep pit 3	24	613.441	77.3306	0.284416	1739.92	219.334	0.806694
13	4	LLMO	Deep pit 2	24	612.314	45.8341	0.309883	1736.72	130	0.878927
14	4	Control	Deep pit 2	24	543.793	47.7327	0.302793	1542.37	135.385	0.858817
1	4	LLMO	Deep pit 1	29	718.603	170.718	0.240602	2038.19	484.211	0.682425
2	4	Control	Deep pit 3	29	699.145	54.6751	0.236228	1983	155.076	0.670017
8	4	Control	Deep pit 1	29	695.456	165.186	0.212833	1972.54	468.521	0.603662
11	4	LLMO	Deep pit 3	29	710.388	62.3348	0.209029	2014.89	176.802	0.592873
13	4	LLMO	Deep pit 2	29	688.367	37.6182	0.212357	1952.43	106.697	0.602314
14	4	Control	Deep pit 2	29	655.149	33.4496	0.197617	1858.21	94.8738	0.560505
1	4	LLMO	Deep pit 1	38	824.324	329.122	0.320007	2338.05	933.496	0.907643
2	4	Control	Deep pit 3	38	751.798	90.9971	0.320598	2132.34	258.097	0.909318
8	4	Control	Deep pit 1	38	840.351	214.011	0.295088	2383.51	607.004	0.836965
11	4	LLMO	Deep pit 3	38	840.29	112.374	0.277727	2383.33	318.728	0.787724
13	4	LLMO	Deep pit 2	38	747.015	61.83	0.268398	2118.77	175.37	0.761261
14	4	Control	Deep pit 2	38	802.007	73.1037	0.280562	2274.75	207.345	0.795763
1	4	LLMO	Deep pit 1	45	734.496	238.409	0.304173	1388.84	450.804	0.575155
2	4	Control	Deep pit 3	45	791.647	119.308	0.291628	1496.91	225.597	0.551433
8	4	Control	Deep pit 1	45	712.364	205.592	0.261057	1346.99	388.749	0.493628
11	4	LLMO	Deep pit 3	45	786.634	97.9252	0.262355	1487.43	185.165	0.496082
13	4	LLMO	Deep pit 2	45	727.554	49.0415	0.286869	1375.72	92.7316	0.542435
14	4	Control	Deep pit 2	45	725.264	62.7333	0.321477	1371.39	118.621	0.607875
1	4	LLMO	Deep pit 1	52	825.039	218.387	0.28762	1560.05	412.944	0.543854
2	4	Control	Deep pit 3	52	768.153	180.813	0.28963	1452.49	341.895	0.547656
8	4	Control	Deep pit 1	52	827.437	333.326	0.265218	1564.59	630.279	0.501496
11	4	LLMO	Deep pit 3	52	870.666	120.91	0.253586	1646.33	228.627	0.479502
13	4	LLMO	Deep pit 2	52	812.318	69.2805	0.254017	1536	131.001	0.480316
14	4	Control	Deep pit 2	52	811.944	106.596	0.250427	1535.29	201.56	0.473528

## Sheet: Odor
This spreadsheet summarizes odor intensity meansurement using dilution Olfactometer							SIDENOTE: COLUMN HEADINGS
							Manure sources	Source of manure
							Treatment	Signifies the name of product used (or the experimental control)
Simulator #	Trial	Treatment	Manure source	Time (day)	Odor Concentration (OU/m3)		Time	The days before or after applying manure additives
1	1	Triune	Deep pit 1	3	420			A negative value for day means time before applying any treatment
2	1	Confine	Outdoor storage	3	263
3	1	Confine	Deep pit 2	3	960
4	1	Triune	Deep pit 2	3	2262
5	1	MMP	Outdoor storage	3	479
6	1	MMP	Deep pit 2	3	520
7	1	Sulfdox	Deep pit 1	3	449
8	1	Sulfdox	Deep pit 2	3	278
9	1	Control	Deep pit 2	3	691
10	1	Sulfdox	Outdoor storage	3	2900
11	1	Control	Deep pit 1	3	524
12	1	MMP	Deep pit 1	3	1278
13	1	Control	Outdoor storage	3	3412
14	1	Triune	Outdoor storage	3	342
15	1	Confine	Deep pit 1	3	797
1	1	Triune	Deep pit 1	8	1554
2	1	Confine	Outdoor storage	8	768
3	1	Confine	Deep pit 2	8	5125
4	1	Triune	Deep pit 2	8	4765
5	1	MMP	Outdoor storage	8	2802
6	1	MMP	Deep pit 2	8	1228
7	1	Sulfdox	Deep pit 1	8	1137
8	1	Sulfdox	Deep pit 2	8	1194
9	1	Control	Deep pit 2	8	2351
10	1	Sulfdox	Outdoor storage	8	2177
11	1	Control	Deep pit 1	8	846
12	1	MMP	Deep pit 1	8	706
13	1	Control	Outdoor storage	8	2604
14	1	Triune	Outdoor storage	8	707
15	1	Confine	Deep pit 1	8	706
1	1	Triune	Deep pit 1	15	1092
2	1	Confine	Outdoor storage	15	605
3	1	Confine	Deep pit 2	15	1985
4	1	Triune	Deep pit 2	15	2655
5	1	MMP	Outdoor storage	15	1362
6	1	MMP	Deep pit 2	15	960
7	1	Sulfdox	Deep pit 1	15	1689
8	1	Sulfdox	Deep pit 2	15	1689
9	1	Control	Deep pit 2	15	3480
10	1	Sulfdox	Outdoor storage	15	1714
11	1	Control	Deep pit 1	15	1859
12	1	MMP	Deep pit 1	15	2231
13	1	Control	Outdoor storage	15	1428
14	1	Triune	Outdoor storage	15	815
15	1	Confine	Deep pit 1	15	1289
1	1	Triune	Deep pit 1	22	1707
2	1	Confine	Outdoor storage	22	732
3	1	Confine	Deep pit 2	22	3313
4	1	Triune	Deep pit 2	22	2960
5	1	MMP	Outdoor storage	22	1554
6	1	MMP	Deep pit 2	22	866
7	1	Sulfdox	Deep pit 1	22	2839
8	1	Sulfdox	Deep pit 2	22	2416
9	1	Control	Deep pit 2	22	2569
10	1	Sulfdox	Outdoor storage	22	2177
11	1	Control	Deep pit 1	22	1180
12	1	MMP	Deep pit 1	22	930
13	1	Control	Outdoor storage	22	2177
14	1	Triune	Outdoor storage	22	506
15	1	Confine	Deep pit 1	22	1422
1	1	Triune	Deep pit 1	29	1078
2	1	Confine	Outdoor storage	29	1530
3	1	Confine	Deep pit 2	29	5125
4	1	Triune	Deep pit 2	29	5125
5	1	MMP	Outdoor storage	29	1859
6	1	MMP	Deep pit 2	29	1832
7	1	Sulfdox	Deep pit 1	29	1428
8	1	Sulfdox	Deep pit 2	29	2802
9	1	Control	Deep pit 2	29	5125
10	1	Sulfdox	Outdoor storage	29	1105
11	1	Control	Deep pit 1	29	1289
12	1	MMP	Deep pit 1	29	1092
13	1	Control	Outdoor storage	29	599
14	1	Triune	Outdoor storage	29	366
15	1	Confine	Deep pit 1	29	1530
1	1	Triune	Deep pit 1	36	2707
2	1	Confine	Outdoor storage	36	1714
3	1	Confine	Deep pit 2	36	3166
4	1	Triune	Deep pit 2	36	7733
5	1	MMP	Outdoor storage	36	996
6	1	MMP	Deep pit 2	36	1038
7	1	Sulfdox	Deep pit 1	36	2988
8	1	Sulfdox	Deep pit 2	36	4422
9	1	Control	Deep pit 2	36	5125
10	1	Sulfdox	Outdoor storage	36	5590
11	1	Control	Deep pit 1	36	2655
12	1	MMP	Deep pit 1	36	3107
13	1	Control	Outdoor storage	36	1156
14	1	Triune	Outdoor storage	36	478
15	1	Confine	Deep pit 1	36	2182
1	1	Triune	Deep pit 1	43	3107
2	1	Confine	Outdoor storage	43	2894
3	1	Confine	Deep pit 2	43	6761
4	1	Triune	Deep pit 2	43	6761
5	1	MMP	Outdoor storage	43	9237
6	1	MMP	Deep pit 2	43	5125
7	1	Sulfdox	Deep pit 1	43	7319
8	1	Sulfdox	Deep pit 2	43	3437
9	1	Control	Deep pit 2	43	7319
10	1	Sulfdox	Outdoor storage	43	3658
11	1	Control	Deep pit 1	43	4275
12	1	MMP	Deep pit 1	43	5257
13	1	Control	Outdoor storage	43	2383
14	1	Triune	Outdoor storage	43	1214
15	1	Confine	Deep pit 1	43	8522
1	1	Triune	Deep pit 1	50	4765
2	1	Confine	Outdoor storage	50	846
3	1	Confine	Deep pit 2	50	6326
4	1	Triune	Deep pit 2	50	5208
5	1	MMP	Outdoor storage	50	670
6	1	MMP	Deep pit 2	50	6326
7	1	Sulfdox	Deep pit 1	50	1689
8	1	Sulfdox	Deep pit 2	50	5820
9	1	Control	Deep pit 2	50	7763
10	1	Sulfdox	Outdoor storage	50	4027
11	1	Control	Deep pit 1	50	5678
12	1	MMP	Deep pit 1	50	3050
13	1	Control	Outdoor storage	50	1554
14	1	Triune	Outdoor storage	50	1043
15	1	Confine	Deep pit 1	50	4765
1	2	Control	Deep pit 1	2	796.505
2	2	Control	Deep pit 2	2	466.123
3	2	WW	Deep pit 3	2	592.647
4	2	MTM	Deep pit 1	2	505.567
5	2	Enviro	Deep pit 1	2	547.698
6	2	MTM	Deep pit 2	2	516.565
7	2	Oxydol	Deep pit 2	2	691.025
8	2	Oxydol	Deep pit 3	2	553.542
9	2	MTM	Deep pit 3	2	500.14
10	2	WW	Deep pit 1	2	553.542
11	2	Control	Deep pit 3	2	505.567
12	2	Enviro	Deep pit 3	2	647.18
13	2	Oxydol	Deep pit 1	2	3055.96
14	2	Enviro	Deep pit 2	2	1253.96
15	2	WW	Deep pit 2	2	2239.38
1	2	Control	Deep pit 1	9	1864.02
2	2	Control	Deep pit 2	9	739.33
3	2	WW	Deep pit 3	9	1480.02
4	2	MTM	Deep pit 1	9	1239.56
5	2	Enviro	Deep pit 1	9	640.071
6	2	MTM	Deep pit 2	9	1205.31
7	2	Oxydol	Deep pit 2	9	796.505
8	2	Oxydol	Deep pit 3	9	412.398
9	2	MTM	Deep pit 3	9	508.331
10	2	WW	Deep pit 1	9	1001.17
11	2	Control	Deep pit 3	9	854.808
12	2	Enviro	Deep pit 3	9	800.497
13	2	Oxydol	Deep pit 1	9	3685.36
14	2	Enviro	Deep pit 2	9	1457.21
15	2	WW	Deep pit 2	9	1645.53
1	2	Control	Deep pit 1	16	3084.44
2	2	Control	Deep pit 2	16	3951.95
3	2	WW	Deep pit 3	16	2574.33
4	2	MTM	Deep pit 1	16	4749.31
5	2	Enviro	Deep pit 1	16	3113.7
6	2	MTM	Deep pit 2	16	1778.44
7	2	Oxydol	Deep pit 2	16	1595.75
8	2	Oxydol	Deep pit 3	16	2770.55
9	2	MTM	Deep pit 3	16	1947.79
10	2	WW	Deep pit 1	16	4379.18
11	2	Control	Deep pit 3	16	2068.92
12	2	Enviro	Deep pit 3	16	2085.53
13	2	Oxydol	Deep pit 1	16	3183.75
14	2	Enviro	Deep pit 2	16	1537.05
15	2	WW	Deep pit 2	16	1817.05
1	2	Control	Deep pit 1	23	5383.29
2	2	Control	Deep pit 2	23	4097.7
3	2	WW	Deep pit 3	23	4035
4	2	MTM	Deep pit 1	23	5383.29
5	2	Enviro	Deep pit 1	23	5383.29
6	2	MTM	Deep pit 2	23	1115.36
7	2	Oxydol	Deep pit 2	23	2185.86
8	2	Oxydol	Deep pit 3	23	5383.29
9	2	MTM	Deep pit 3	23	5108.63
10	2	WW	Deep pit 1	23	4579.27
11	2	Control	Deep pit 3	23	2584.21
12	2	Enviro	Deep pit 3	23	4749.31
13	2	Oxydol	Deep pit 1	23	5383.29
14	2	Enviro	Deep pit 2	23	1319.42
15	2	WW	Deep pit 2	23	2230.96
1	2	Control	Deep pit 1	30	3206.6
2	2	Control	Deep pit 2	30	1718.69
3	2	WW	Deep pit 3	30	2717.01
4	2	MTM	Deep pit 1	30	3405.16
5	2	Enviro	Deep pit 1	30	2883
6	2	MTM	Deep pit 2	30	1319.42
7	2	Oxydol	Deep pit 2	30	1253.96
8	2	Oxydol	Deep pit 3	30	3362.55
9	2	MTM	Deep pit 3	30	2949.23
10	2	WW	Deep pit 1	30	3405.16
11	2	Control	Deep pit 3	30	2107.44
12	2	Enviro	Deep pit 3	30	2331.93
13	2	Oxydol	Deep pit 1	30	2355.75
14	2	Enviro	Deep pit 2	30	1415.41
15	2	WW	Deep pit 2	30	1785.75
1	2	Control	Deep pit 1	37	5291.87
2	2	Control	Deep pit 2	37	2584.21
3	2	WW	Deep pit 3	37	3951.95
4	2	MTM	Deep pit 1	37	4035
5	2	Enviro	Deep pit 1	37	5910.18
6	2	MTM	Deep pit 2	37	3587.51
7	2	Oxydol	Deep pit 2	37	3016.57
8	2	Oxydol	Deep pit 3	37	5573.14
9	2	MTM	Deep pit 3	37	4268.58
10	2	WW	Deep pit 1	37	5291.87
11	2	Control	Deep pit 3	37	4549.83
12	2	Enviro	Deep pit 3	37	4268.58
13	2	Oxydol	Deep pit 1	37	5573.14
14	2	Enviro	Deep pit 2	37	1992.73
15	2	WW	Deep pit 2	37	2474.67
1	2	Control	Deep pit 1	44	4430.55
2	2	Control	Deep pit 2	44	2115.95
3	2	WW	Deep pit 3	44	4626.41
4	2	MTM	Deep pit 1	44	3620.14
5	2	Enviro	Deep pit 1	44	4430.55
6	2	MTM	Deep pit 2	44	1752.17
7	2	Oxydol	Deep pit 2	44	3218.21
8	2	Oxydol	Deep pit 3	44	4596.76
9	2	MTM	Deep pit 3	44	3620.14
10	2	WW	Deep pit 1	44	3125.07
11	2	Control	Deep pit 3	44	4596.76
12	2	Enviro	Deep pit 3	44	3836.59
13	2	Oxydol	Deep pit 1	44	3436.59
14	2	Enviro	Deep pit 2	44	3986.9
15	2	WW	Deep pit 2	44	4333.81
1	2	Control	Deep pit 1	51	7123.25
2	2	Control	Deep pit 2	51	4218.53
3	2	WW	Deep pit 3	51	5910.18
4	2	MTM	Deep pit 1	51	5426.58
5	2	Enviro	Deep pit 1	51	7071.39
6	2	MTM	Deep pit 2	51	5426.58
7	2	Oxydol	Deep pit 2	51	5108.63
8	2	Oxydol	Deep pit 3	51	7287.16
9	2	MTM	Deep pit 3	51	6525.81
10	2	WW	Deep pit 1	51	6575.02
11	2	Control	Deep pit 3	51	6055.25
12	2	Enviro	Deep pit 3	51	5563.6
13	2	Oxydol	Deep pit 1	51	5910.18
14	2	Enviro	Deep pit 2	51	4671.32
15	2	WW	Deep pit 2	51	3917.92
1	3	Control	Deep pit 1	-5	8081.05
2	3	MM	Deep pit 1	-5	6477.82
3	3	Control	Deep pit 2	-5	5802.07
5	3	MM	Deep pit 3	-5	6326.08
7	3	Sludge	Deep pit 2	-5	5712.63
9	3	Peneteric	Deep pit 2	-5	9429.8
10	3	Control	Deep pit 3	-5	6477.82
11	3	MM	Deep pit 2	-5	6730.65
12	3	Peneteric	Deep pit 3	-5	5819.63
13	3	Peneteric	Deep pit 1	-5	5182.46
14	3	Sludge	Deep pit 1	-5	6148.23
15	3	Sludge	Deep pit 3	-5	5324.53
1	3	Control	Deep pit 1	2	5108.63
2	3	MM	Deep pit 1	2	4035
3	3	Control	Deep pit 2	2	3723.63
5	3	MM	Deep pit 3	2	3443.4
7	3	Sludge	Deep pit 2	2	4671.32
9	3	Peneteric	Deep pit 2	2	3951.95
10	3	Control	Deep pit 3	2	2807.57
11	3	MM	Deep pit 2	2	4146.74
12	3	Peneteric	Deep pit 3	2	2839.01
13	3	Peneteric	Deep pit 1	2	3319.99
14	3	Sludge	Deep pit 1	2	3523.53
15	3	Sludge	Deep pit 3	2	3543.27
1	3	Control	Deep pit 1	9	6119.31
2	3	MM	Deep pit 1	9	6642.66
3	3	Control	Deep pit 2	9	10115.2
5	3	MM	Deep pit 3	9	7838.51
7	3	Sludge	Deep pit 2	9	7538.47
9	3	Peneteric	Deep pit 2	9	7485.77
10	3	Control	Deep pit 3	9	7359.46
11	3	MM	Deep pit 2	9	9079.7
12	3	Peneteric	Deep pit 3	9	6392.02
13	3	Peneteric	Deep pit 1	9	5573.14
14	3	Sludge	Deep pit 1	9	5712.63
15	3	Sludge	Deep pit 3	9	5973.22
1	3	Control	Deep pit 1	16	5864.33
2	3	MM	Deep pit 1	16	5573.14
3	3	Control	Deep pit 2	16	7060.22
5	3	MM	Deep pit 3	16	5108.63
7	3	Sludge	Deep pit 2	16	6008.65
9	3	Peneteric	Deep pit 2	16	7123.25
10	3	Control	Deep pit 3	16	6642.66
11	3	MM	Deep pit 2	16	5108.63
12	3	Peneteric	Deep pit 3	16	6055.25
13	3	Peneteric	Deep pit 1	16	5712.63
14	3	Sludge	Deep pit 1	16	5108.63
15	3	Sludge	Deep pit 3	16	7060.22
1	3	Control	Deep pit 1	23	4890.05
2	3	MM	Deep pit 1	23	5678.38
3	3	Control	Deep pit 2	23	9749.83
5	3	MM	Deep pit 3	23	8081.05
7	3	Sludge	Deep pit 2	23	8081.05
9	3	Peneteric	Deep pit 2	23	9749.83
10	3	Control	Deep pit 3	23	6760.87
11	3	MM	Deep pit 2	23	8081.05
12	3	Peneteric	Deep pit 3	23	6231.32
13	3	Peneteric	Deep pit 1	23	6760.87
14	3	Sludge	Deep pit 1	23	6604.79
15	3	Sludge	Deep pit 3	23	8081.05
1	3	Control	Deep pit 1	30	3313.35
2	3	MM	Deep pit 1	30	3593.05
3	3	Control	Deep pit 2	30	4274.86
5	3	MM	Deep pit 3	30	3889.27
7	3	Sludge	Deep pit 2	30	3889.27
9	3	Peneteric	Deep pit 2	30	3593.05
10	3	Control	Deep pit 3	30	3889.27
11	3	MM	Deep pit 2	30	3889.27
12	3	Peneteric	Deep pit 3	30	3889.27
13	3	Peneteric	Deep pit 1	30	3889.27
14	3	Sludge	Deep pit 1	30	3889.27
15	3	Sludge	Deep pit 3	30	4274.86
1	3	Control	Deep pit 1	37	4422.4
2	3	MM	Deep pit 1	37	4843.7
3	3	Control	Deep pit 2	37	4843.7
5	3	MM	Deep pit 3	37	4422.4
7	3	Sludge	Deep pit 2	37	4497.49
9	3	Peneteric	Deep pit 2	37	4497.49
10	3	Control	Deep pit 3	37	4497.49
11	3	MM	Deep pit 2	37	4497.49
12	3	Peneteric	Deep pit 3	37	4422.4
13	3	Peneteric	Deep pit 1	37	4843.7
14	3	Sludge	Deep pit 1	37	4168.9
15	3	Sludge	Deep pit 3	37	3543.27
1	3	Control	Deep pit 1	44	4422.4
2	3	MM	Deep pit 1	44	4686.47
3	3	Control	Deep pit 2	44	5124.74
5	3	MM	Deep pit 3	44	4686.47
7	3	Sludge	Deep pit 2	44	4422.4
9	3	Peneteric	Deep pit 2	44	5124.74
10	3	Control	Deep pit 3	44	4027.37
11	3	MM	Deep pit 2	44	5124.74
12	3	Peneteric	Deep pit 3	44	4422.4
13	3	Peneteric	Deep pit 1	44	4422.4
14	3	Sludge	Deep pit 1	44	3957.89
15	3	Sludge	Deep pit 3	44	5341.11
1	3	Control	Deep pit 1	51	3657.93
2	3	MM	Deep pit 1	51	4686.47
3	3	Control	Deep pit 2	51	6760.87
5	3	MM	Deep pit 3	51	4686.47
7	3	Sludge	Deep pit 2	51	4686.47
9	3	Peneteric	Deep pit 2	51	5730.02
10	3	Control	Deep pit 3	51	2416.49
11	3	MM	Deep pit 2	51	4764.64
12	3	Peneteric	Deep pit 3	51	4274.86
13	3	Peneteric	Deep pit 1	51	3957.89
14	3	Sludge	Deep pit 1	51	4274.86
15	3	Sludge	Deep pit 3	51	5124.74
1	4	LLMO	Deep pit 1	-3	547.698
2	4	Control	Deep pit 3	-3	1008.39
8	4	Control	Deep pit 1	-3	996.013
11	4	LLMO	Deep pit 3	-3	835.522
13	4	LLMO	Deep pit 2	-3	1530.38
14	4	Control	Deep pit 2	-3	1304.13
1	4	LLMO	Deep pit 1	5	768.415
2	4	Control	Deep pit 3	5	846.289
8	4	Control	Deep pit 1	5	653.871
11	4	LLMO	Deep pit 3	5	647.18
13	4	LLMO	Deep pit 2	5	705.702
14	4	Control	Deep pit 2	5	722.359
1	4	LLMO	Deep pit 1	12	3374.56
2	4	Control	Deep pit 3	12	3593.05
8	4	Control	Deep pit 1	12	930.341
11	4	LLMO	Deep pit 3	12	1793.26
13	4	LLMO	Deep pit 2	12	2239.38
14	4	Control	Deep pit 2	12	2801.69
1	4	LLMO	Deep pit 1	19	2931.95
2	4	Control	Deep pit 3	19	4970.54
8	4	Control	Deep pit 1	19	1228.13
11	4	LLMO	Deep pit 3	19	5819.63
13	4	LLMO	Deep pit 2	19	5910.18
14	4	Control	Deep pit 2	19	5819.63
1	4	LLMO	Deep pit 1	26	4970.54
2	4	Control	Deep pit 3	26	3107.37
8	4	Control	Deep pit 1	26	3479.87
11	4	LLMO	Deep pit 3	26	2285.3
13	4	LLMO	Deep pit 2	26	3165.81
14	4	Control	Deep pit 2	26	4097.7
1	4	LLMO	Deep pit 1	33	4027.37
2	4	Control	Deep pit 3	33	3657.93
8	4	Control	Deep pit 1	33	2839.01
11	4	LLMO	Deep pit 3	33	4422.4
13	4	LLMO	Deep pit 2	33	4348.19
14	4	Control	Deep pit 2	33	3769.46
1	4	LLMO	Deep pit 1	40	3436.59
2	4	Control	Deep pit 3	40	2465.09
8	4	Control	Deep pit 1	40	3790.18
11	4	LLMO	Deep pit 3	40	1356.17
13	4	LLMO	Deep pit 2	40	2691.07
14	4	Control	Deep pit 2	40	3147.61
1	4	LLMO	Deep pit 1	47	4097.7
2	4	Control	Deep pit 3	47	3147.61
8	4	Control	Deep pit 1	47	5963.22
11	4	LLMO	Deep pit 3	47	2499.06
13	4	LLMO	Deep pit 2	47	1886.77
14	4	Control	Deep pit 2	47	2893.74
1	4	LLMO	Deep pit 1	50	4348.19
2	4	Control	Deep pit 3	50	3247.78
8	4	Control	Deep pit 1	50	4027.37
11	4	LLMO	Deep pit 3	50	2931.95
13	4	LLMO	Deep pit 2	50	2931.95
14	4	Control	Deep pit 2	50	3247.78

## Sheet: VOCs
The spreadsheet contains the inforamtion of volatile organic compounds (VOCs), i.e., compound names, selected ion used to identify the compound, CAS number, GC column retention time, and peak area counts.												SIDENOTE: COLUMN HEADINGS
												Manure sources	Source of manure
												Treatment	Signifies the name of product used (or the experimental control)
Simulator #	Trial	Treatment	Manure source	Time (week)	Compound name	Ion selected for abundance	CAS #	GC column retention time (min)	Peak area count (arbitrary units)			Time	The days before or after applying manure additives
1	1	Triune	Deep pit 1	-1	Skatole	130	83-34-1	29.16	1289970				A negative value for day means time before applying any treatment
2	1	Confine	Outdoor storage	-1	Skatole	130	83-34-1	29.16	1208680			Compound name	the name of the targeted VOCs
3	1	Confine	Deep pit 2	-1	Skatole	130	83-34-1	29.16	553325			Ion selected for abundance	The ion used to determine the relative abundance of the targeted VOC
4	1	Triune	Deep pit 2	-1	Skatole	130	83-34-1	29.16	397306			GC column retention time	The time when the targeted VOC eluted from the GC column during gas sample analysis
5	1	MMP	Outdoor storage	-1	Skatole	130	83-34-1	29.16	1482050			Peak area count	Peak area count (under the peak associated with each targeted VOC) was used as a surrogate measure of concentration
6	1	MMP	Deep pit 2	-1	Skatole	130	83-34-1	29.16	578592
7	1	Sulfdox	Deep pit 1	-1	Skatole	130	83-34-1	29.16	2802650
8	1	Sulfdox	Deep pit 2	-1	Skatole	130	83-34-1	29.16	747174
9	1	Control	Deep pit 2	-1	Skatole	130	83-34-1	29.16	1172744
10	1	Sulfdox	Outdoor storage	-1	Skatole	130	83-34-1	29.16	5205639
11	1	Control	Deep pit 1	-1	Skatole	130	83-34-1	29.16	704348
12	1	MMP	Deep pit 1	-1	Skatole	130	83-34-1	29.16	1529776
13	1	Control	Outdoor storage	-1	Skatole	130	83-34-1	29.16	364090
14	1	Triune	Outdoor storage	-1	Skatole	130	83-34-1	29.16	1620530
15	1	Confine	Deep pit 1	-1	Skatole	130	83-34-1	29.16	1887679
1	1	Triune	Deep pit 1	1	Skatole	130	83-34-1	29.16	1761849
2	1	Confine	Outdoor storage	1	Skatole	130	83-34-1	29.16	1501120
3	1	Confine	Deep pit 2	1	Skatole	130	83-34-1	29.16	743170
4	1	Triune	Deep pit 2	1	Skatole	130	83-34-1	29.16	706670
5	1	MMP	Outdoor storage	1	Skatole	130	83-34-1	29.16	2905769
6	1	MMP	Deep pit 2	1	Skatole	130	83-34-1	29.16	731821
7	1	Sulfdox	Deep pit 1	1	Skatole	130	83-34-1	29.16	1711393
8	1	Sulfdox	Deep pit 2	1	Skatole	130	83-34-1	29.16	418629
9	1	Control	Deep pit 2	1	Skatole	130	83-34-1	29.16	544069
10	1	Sulfdox	Outdoor storage	1	Skatole	130	83-34-1	29.16	1184023
11	1	Control	Deep pit 1	1	Skatole	130	83-34-1	29.16	1745851
12	1	MMP	Deep pit 1	1	Skatole	130	83-34-1	29.16	2665710
13	1	Control	Outdoor storage	1	Skatole	130	83-34-1	29.16	1481009
14	1	Triune	Outdoor storage	1	Skatole	130	83-34-1	29.16	2103810
15	1	Confine	Deep pit 1	1	Skatole	130	83-34-1	29.16	1302442
1	1	Triune	Deep pit 1	2	Skatole	130	83-34-1	29.16	1229523
2	1	Confine	Outdoor storage	2	Skatole	130	83-34-1	29.16	2024474
3	1	Confine	Deep pit 2	2	Skatole	130	83-34-1	29.16	791884
4	1	Triune	Deep pit 2	2	Skatole	130	83-34-1	29.16	813686
5	1	MMP	Outdoor storage	2	Skatole	130	83-34-1	29.16	1619763
6	1	MMP	Deep pit 2	2	Skatole	130	83-34-1	29.16	256618
7	1	Sulfdox	Deep pit 1	2	Skatole	130	83-34-1	29.16	876112
8	1	Sulfdox	Deep pit 2	2	Skatole	130	83-34-1	29.16	265430
9	1	Control	Deep pit 2	2	Skatole	130	83-34-1	29.16	227794
10	1	Sulfdox	Outdoor storage	2	Skatole	130	83-34-1	29.16	1713629
11	1	Control	Deep pit 1	2	Skatole	130	83-34-1	29.16	1901546
12	1	MMP	Deep pit 1	2	Skatole	130	83-34-1	29.16	991702
13	1	Control	Outdoor storage	2	Skatole	130	83-34-1	29.16	1755720
14	1	Triune	Outdoor storage	2	Skatole	130	83-34-1	29.16	3375275
15	1	Confine	Deep pit 1	2	Skatole	130	83-34-1	29.16	939768
1	1	Triune	Deep pit 1	3	Skatole	130	83-34-1	29.16	2376010
2	1	Confine	Outdoor storage	3	Skatole	130	83-34-1	29.16	3404733
3	1	Confine	Deep pit 2	3	Skatole	130	83-34-1	29.16	504022
4	1	Triune	Deep pit 2	3	Skatole	130	83-34-1	29.16	494514
5	1	MMP	Outdoor storage	3	Skatole	130	83-34-1	29.16	2763622
6	1	MMP	Deep pit 2	3	Skatole	130	83-34-1	29.16	162268
7	1	Sulfdox	Deep pit 1	3	Skatole	130	83-34-1	29.16	2907321
8	1	Sulfdox	Deep pit 2	3	Skatole	130	83-34-1	29.16	236311
9	1	Control	Deep pit 2	3	Skatole	130	83-34-1	29.16	336220
10	1	Sulfdox	Outdoor storage	3	Skatole	130	83-34-1	29.16	1839815
11	1	Control	Deep pit 1	3	Skatole	130	83-34-1	29.16	2167807
12	1	MMP	Deep pit 1	3	Skatole	130	83-34-1	29.16	1700546
13	1	Control	Outdoor storage	3	Skatole	130	83-34-1	29.16	2137314
14	1	Triune	Outdoor storage	3	Skatole	130	83-34-1	29.16	3428369
15	1	Confine	Deep pit 1	3	Skatole	130	83-34-1	29.16	2278505
1	1	Triune	Deep pit 1	4	Skatole	130	83-34-1	29.16	1233199
2	1	Confine	Outdoor storage	4	Skatole	130	83-34-1	29.16	1568245
3	1	Confine	Deep pit 2	4	Skatole	130	83-34-1	29.16	307705
4	1	Triune	Deep pit 2	4	Skatole	130	83-34-1	29.16	475203
5	1	MMP	Outdoor storage	4	Skatole	130	83-34-1	29.16	1122940
6	1	MMP	Deep pit 2	4	Skatole	130	83-34-1	29.16	57905
7	1	Sulfdox	Deep pit 1	4	Skatole	130	83-34-1	29.16	1498363
8	1	Sulfdox	Deep pit 2	4	Skatole	130	83-34-1	29.16	113609
9	1	Control	Deep pit 2	4	Skatole	130	83-34-1	29.16	117289
10	1	Sulfdox	Outdoor storage	4	Skatole	130	83-34-1	29.16	643654
11	1	Control	Deep pit 1	4	Skatole	130	83-34-1	29.16	1313771
12	1	MMP	Deep pit 1	4	Skatole	130	83-34-1	29.16	1481139
13	1	Control	Outdoor storage	4	Skatole	130	83-34-1	29.16	1767395
14	1	Triune	Outdoor storage	4	Skatole	130	83-34-1	29.16	776013
15	1	Confine	Deep pit 1	4	Skatole	130	83-34-1	29.16	1052963
1	1	Triune	Deep pit 1	5	Skatole	130	83-34-1	29.16	2320404
2	1	Confine	Outdoor storage	5	Skatole	130	83-34-1	29.16	1397802
3	1	Confine	Deep pit 2	5	Skatole	130	83-34-1	29.16	351341
4	1	Triune	Deep pit 2	5	Skatole	130	83-34-1	29.16	307143
5	1	MMP	Outdoor storage	5	Skatole	130	83-34-1	29.16	1649598
6	1	MMP	Deep pit 2	5	Skatole	130	83-34-1	29.16	32418
7	1	Sulfdox	Deep pit 1	5	Skatole	130	83-34-1	29.16	1920346
8	1	Sulfdox	Deep pit 2	5	Skatole	130	83-34-1	29.16	194242
9	1	Control	Deep pit 2	5	Skatole	130	83-34-1	29.16	249586
10	1	Sulfdox	Outdoor storage	5	Skatole	130	83-34-1	29.16	1456812
11	1	Control	Deep pit 1	5	Skatole	130	83-34-1	29.16	2104625
12	1	MMP	Deep pit 1	5	Skatole	130	83-34-1	29.16	1896785
13	1	Control	Outdoor storage	5	Skatole	130	83-34-1	29.16	1995460
14	1	Triune	Outdoor storage	5	Skatole	130	83-34-1	29.16	4225747
15	1	Confine	Deep pit 1	5	Skatole	130	83-34-1	29.16	2322229
1	1	Triune	Deep pit 1	6	Skatole	130	83-34-1	29.16	916554
2	1	Confine	Outdoor storage	6	Skatole	130	83-34-1	29.16	676506
3	1	Confine	Deep pit 2	6	Skatole	130	83-34-1	29.16	713123
4	1	Triune	Deep pit 2	6	Skatole	130	83-34-1	29.16	498543
5	1	MMP	Outdoor storage	6	Skatole	130	83-34-1	29.16	1473389
6	1	MMP	Deep pit 2	6	Skatole	130	83-34-1	29.16	244478
7	1	Sulfdox	Deep pit 1	6	Skatole	130	83-34-1	29.16	787676
8	1	Sulfdox	Deep pit 2	6	Skatole	130	83-34-1	29.16	307767
9	1	Control	Deep pit 2	6	Skatole	130	83-34-1	29.16	310069
10	1	Sulfdox	Outdoor storage	6	Skatole	130	83-34-1	29.16	1383356
11	1	Control	Deep pit 1	6	Skatole	130	83-34-1	29.16	284035
12	1	MMP	Deep pit 1	6	Skatole	130	83-34-1	29.16	1931504
13	1	Control	Outdoor storage	6	Skatole	130	83-34-1	29.16	2220016
14	1	Triune	Outdoor storage	6	Skatole	130	83-34-1	29.16	2216506
15	1	Confine	Deep pit 1	6	Skatole	130	83-34-1	29.16	722931
1	1	Triune	Deep pit 1	7	Skatole	130	83-34-1	29.16	1658339
2	1	Confine	Outdoor storage	7	Skatole	130	83-34-1	29.16	1791509
3	1	Confine	Deep pit 2	7	Skatole	130	83-34-1	29.16	172489
4	1	Triune	Deep pit 2	7	Skatole	130	83-34-1	29.16	185424
5	1	MMP	Outdoor storage	7	Skatole	130	83-34-1	29.16	2328421
6	1	MMP	Deep pit 2	7	Skatole	130	83-34-1	29.16	182892
7	1	Sulfdox	Deep pit 1	7	Skatole	130	83-34-1	29.16	484493
8	1	Sulfdox	Deep pit 2	7	Skatole	130	83-34-1	29.16	198667
9	1	Control	Deep pit 2	7	Skatole	130	83-34-1	29.16	535676
10	1	Sulfdox	Outdoor storage	7	Skatole	130	83-34-1	29.16	1047534
11	1	Control	Deep pit 1	7	Skatole	130	83-34-1	29.16	1765546
12	1	MMP	Deep pit 1	7	Skatole	130	83-34-1	29.16	2187339
13	1	Control	Outdoor storage	7	Skatole	130	83-34-1	29.16	1400098
14	1	Triune	Outdoor storage	7	Skatole	130	83-34-1	29.16	2385392
15	1	Confine	Deep pit 1	7	Skatole	130	83-34-1	29.16	1348355
1	1	Triune	Deep pit 1	8	Skatole	130	83-34-1	29.16	1458670
2	1	Confine	Outdoor storage	8	Skatole	130	83-34-1	29.16	1326475
3	1	Confine	Deep pit 2	8	Skatole	130	83-34-1	29.16	1006191
4	1	Triune	Deep pit 2	8	Skatole	130	83-34-1	29.16	131496
5	1	MMP	Outdoor storage	8	Skatole	130	83-34-1	29.16	1459219
6	1	MMP	Deep pit 2	8	Skatole	130	83-34-1	29.16	437970
7	1	Sulfdox	Deep pit 1	8	Skatole	130	83-34-1	29.16	1896664
8	1	Sulfdox	Deep pit 2	8	Skatole	130	83-34-1	29.16	730021
9	1	Control	Deep pit 2	8	Skatole	130	83-34-1	29.16	1651556
10	1	Sulfdox	Outdoor storage	8	Skatole	130	83-34-1	29.16	1598385
11	1	Control	Deep pit 1	8	Skatole	130	83-34-1	29.16	1543926
12	1	MMP	Deep pit 1	8	Skatole	130	83-34-1	29.16	637442
13	1	Control	Outdoor storage	8	Skatole	130	83-34-1	29.16	778913
14	1	Triune	Outdoor storage	8	Skatole	130	83-34-1	29.16	778983
15	1	Confine	Deep pit 1	8	Skatole	130	83-34-1	29.16	1113734
1	1	Triune	Deep pit 1	-1	Indole	117	120-72-9	28.37	0
2	1	Confine	Outdoor storage	-1	Indole	117	120-72-9	28.37	19852
3	1	Confine	Deep pit 2	-1	Indole	117	120-72-9	28.37	7239
4	1	Triune	Deep pit 2	-1	Indole	117	120-72-9	28.37	10523
5	1	MMP	Outdoor storage	-1	Indole	117	120-72-9	28.37	35553
6	1	MMP	Deep pit 2	-1	Indole	117	120-72-9	28.37	3438
7	1	Sulfdox	Deep pit 1	-1	Indole	117	120-72-9	28.37	14516
8	1	Sulfdox	Deep pit 2	-1	Indole	117	120-72-9	28.37	5381
9	1	Control	Deep pit 2	-1	Indole	117	120-72-9	28.37	18532
10	1	Sulfdox	Outdoor storage	-1	Indole	117	120-72-9	28.37	91366
11	1	Control	Deep pit 1	-1	Indole	117	120-72-9	28.37	8130
12	1	MMP	Deep pit 1	-1	Indole	117	120-72-9	28.37	15387
13	1	Control	Outdoor storage	-1	Indole	117	120-72-9	28.37	10490
14	1	Triune	Outdoor storage	-1	Indole	117	120-72-9	28.37	12608
15	1	Confine	Deep pit 1	-1	Indole	117	120-72-9	28.37	25996
1	1	Triune	Deep pit 1	1	Indole	117	120-72-9	28.37	44816
2	1	Confine	Outdoor storage	1	Indole	117	120-72-9	28.37	33912
3	1	Confine	Deep pit 2	1	Indole	117	120-72-9	28.37	16395
4	1	Triune	Deep pit 2	1	Indole	117	120-72-9	28.37	75142
5	1	MMP	Outdoor storage	1	Indole	117	120-72-9	28.37	114524
6	1	MMP	Deep pit 2	1	Indole	117	120-72-9	28.37	5778
7	1	Sulfdox	Deep pit 1	1	Indole	117	120-72-9	28.37	26536
8	1	Sulfdox	Deep pit 2	1	Indole	117	120-72-9	28.37	5144
9	1	Control	Deep pit 2	1	Indole	117	120-72-9	28.37	6722
10	1	Sulfdox	Outdoor storage	1	Indole	117	120-72-9	28.37	27984
11	1	Control	Deep pit 1	1	Indole	117	120-72-9	28.37	10148
12	1	MMP	Deep pit 1	1	Indole	117	120-72-9	28.37	17249
13	1	Control	Outdoor storage	1	Indole	117	120-72-9	28.37	57756
14	1	Triune	Outdoor storage	1	Indole	117	120-72-9	28.37	34457
15	1	Confine	Deep pit 1	1	Indole	117	120-72-9	28.37	5628
1	1	Triune	Deep pit 1	2	Indole	117	120-72-9	28.37	10399
2	1	Confine	Outdoor storage	2	Indole	117	120-72-9	28.37	43060
3	1	Confine	Deep pit 2	2	Indole	117	120-72-9	28.37	14667
4	1	Triune	Deep pit 2	2	Indole	117	120-72-9	28.37	15474
5	1	MMP	Outdoor storage	2	Indole	117	120-72-9	28.37	43093
6	1	MMP	Deep pit 2	2	Indole	117	120-72-9	28.37	2027
7	1	Sulfdox	Deep pit 1	2	Indole	117	120-72-9	28.37	7783
8	1	Sulfdox	Deep pit 2	2	Indole	117	120-72-9	28.37	2449
9	1	Control	Deep pit 2	2	Indole	117	120-72-9	28.37	3585
10	1	Sulfdox	Outdoor storage	2	Indole	117	120-72-9	28.37	33989
11	1	Control	Deep pit 1	2	Indole	117	120-72-9	28.37	7925
12	1	MMP	Deep pit 1	2	Indole	117	120-72-9	28.37	5282
13	1	Control	Outdoor storage	2	Indole	117	120-72-9	28.37	61201
14	1	Triune	Outdoor storage	2	Indole	117	120-72-9	28.37	20680
15	1	Confine	Deep pit 1	2	Indole	117	120-72-9	28.37	7108
1	1	Triune	Deep pit 1	3	Indole	117	120-72-9	28.37	14221
2	1	Confine	Outdoor storage	3	Indole	117	120-72-9	28.37	49824
3	1	Confine	Deep pit 2	3	Indole	117	120-72-9	28.37	4452
4	1	Triune	Deep pit 2	3	Indole	117	120-72-9	28.37	8502
5	1	MMP	Outdoor storage	3	Indole	117	120-72-9	28.37	28634
6	1	MMP	Deep pit 2	3	Indole	117	120-72-9	28.37	2877
7	1	Sulfdox	Deep pit 1	3	Indole	117	120-72-9	28.37	23210
8	1	Sulfdox	Deep pit 2	3	Indole	117	120-72-9	28.37	4448
9	1	Control	Deep pit 2	3	Indole	117	120-72-9	28.37	5606
10	1	Sulfdox	Outdoor storage	3	Indole	117	120-72-9	28.37	34427
11	1	Control	Deep pit 1	3	Indole	117	120-72-9	28.37	16929
12	1	MMP	Deep pit 1	3	Indole	117	120-72-9	28.37	14126
13	1	Control	Outdoor storage	3	Indole	117	120-72-9	28.37	31295
14	1	Triune	Outdoor storage	3	Indole	117	120-72-9	28.37	26491
15	1	Confine	Deep pit 1	3	Indole	117	120-72-9	28.37	15581
1	1	Triune	Deep pit 1	4	Indole	117	120-72-9	28.37	5745
2	1	Confine	Outdoor storage	4	Indole	117	120-72-9	28.37	33430
3	1	Confine	Deep pit 2	4	Indole	117	120-72-9	28.37	4760
4	1	Triune	Deep pit 2	4	Indole	117	120-72-9	28.37	12454
5	1	MMP	Outdoor storage	4	Indole	117	120-72-9	28.37	11789
6	1	MMP	Deep pit 2	4	Indole	117	120-72-9	28.37	2920
7	1	Sulfdox	Deep pit 1	4	Indole	117	120-72-9	28.37	6251
8	1	Sulfdox	Deep pit 2	4	Indole	117	120-72-9	28.37	1669
9	1	Control	Deep pit 2	4	Indole	117	120-72-9	28.37	2486
10	1	Sulfdox	Outdoor storage	4	Indole	117	120-72-9	28.37	12924
11	1	Control	Deep pit 1	4	Indole	117	120-72-9	28.37	3876
12	1	MMP	Deep pit 1	4	Indole	117	120-72-9	28.37	8805
13	1	Control	Outdoor storage	4	Indole	117	120-72-9	28.37	61361
14	1	Triune	Outdoor storage	4	Indole	117	120-72-9	28.37	6905
15	1	Confine	Deep pit 1	4	Indole	117	120-72-9	28.37	6869
1	1	Triune	Deep pit 1	5	Indole	117	120-72-9	28.37	6672
2	1	Confine	Outdoor storage	5	Indole	117	120-72-9	28.37	27559
3	1	Confine	Deep pit 2	5	Indole	117	120-72-9	28.37	4284
4	1	Triune	Deep pit 2	5	Indole	117	120-72-9	28.37	7257
5	1	MMP	Outdoor storage	5	Indole	117	120-72-9	28.37	33068
6	1	MMP	Deep pit 2	5	Indole	117	120-72-9	28.37	995
7	1	Sulfdox	Deep pit 1	5	Indole	117	120-72-9	28.37	5704
8	1	Sulfdox	Deep pit 2	5	Indole	117	120-72-9	28.37	2977
9	1	Control	Deep pit 2	5	Indole	117	120-72-9	28.37	19952
10	1	Sulfdox	Outdoor storage	5	Indole	117	120-72-9	28.37	45553
11	1	Control	Deep pit 1	5	Indole	117	120-72-9	28.37	6489
12	1	MMP	Deep pit 1	5	Indole	117	120-72-9	28.37	8307
13	1	Control	Outdoor storage	5	Indole	117	120-72-9	28.37	23192
14	1	Triune	Outdoor storage	5	Indole	117	120-72-9	28.37	43144
15	1	Confine	Deep pit 1	5	Indole	117	120-72-9	28.37	13701
1	1	Triune	Deep pit 1	6	Indole	117	120-72-9	28.37	2572
2	1	Confine	Outdoor storage	6	Indole	117	120-72-9	28.37	8743
3	1	Confine	Deep pit 2	6	Indole	117	120-72-9	28.37	9486
4	1	Triune	Deep pit 2	6	Indole	117	120-72-9	28.37	21434
5	1	MMP	Outdoor storage	6	Indole	117	120-72-9	28.37	24949
6	1	MMP	Deep pit 2	6	Indole	117	120-72-9	28.37	3905
7	1	Sulfdox	Deep pit 1	6	Indole	117	120-72-9	28.37	2398
8	1	Sulfdox	Deep pit 2	6	Indole	117	120-72-9	28.37	5611
9	1	Control	Deep pit 2	6	Indole	117	120-72-9	28.37	16030
10	1	Sulfdox	Outdoor storage	6	Indole	117	120-72-9	28.37	52776
11	1	Control	Deep pit 1	6	Indole	117	120-72-9	28.37	3349
12	1	MMP	Deep pit 1	6	Indole	117	120-72-9	28.37	10077
13	1	Control	Outdoor storage	6	Indole	117	120-72-9	28.37	23224
14	1	Triune	Outdoor storage	6	Indole	117	120-72-9	28.37	24915
15	1	Confine	Deep pit 1	6	Indole	117	120-72-9	28.37	8156
1	1	Triune	Deep pit 1	7	Indole	117	120-72-9	28.37	6012
2	1	Confine	Outdoor storage	7	Indole	117	120-72-9	28.37	28413
3	1	Confine	Deep pit 2	7	Indole	117	120-72-9	28.37	29597
4	1	Triune	Deep pit 2	7	Indole	117	120-72-9	28.37	7958
5	1	MMP	Outdoor storage	7	Indole	117	120-72-9	28.37	60600
6	1	MMP	Deep pit 2	7	Indole	117	120-72-9	28.37	9014
7	1	Sulfdox	Deep pit 1	7	Indole	117	120-72-9	28.37	1000
8	1	Sulfdox	Deep pit 2	7	Indole	117	120-72-9	28.37	8644
9	1	Control	Deep pit 2	7	Indole	117	120-72-9	28.37	25504
10	1	Sulfdox	Outdoor storage	7	Indole	117	120-72-9	28.37	48067
11	1	Control	Deep pit 1	7	Indole	117	120-72-9	28.37	4197
12	1	MMP	Deep pit 1	7	Indole	117	120-72-9	28.37	9058
13	1	Control	Outdoor storage	7	Indole	117	120-72-9	28.37	18201
14	1	Triune	Outdoor storage	7	Indole	117	120-72-9	28.37	17301
15	1	Confine	Deep pit 1	7	Indole	117	120-72-9	28.37	3118
1	1	Triune	Deep pit 1	8	Indole	117	120-72-9	28.37	2803
2	1	Confine	Outdoor storage	8	Indole	117	120-72-9	28.37	21265
3	1	Confine	Deep pit 2	8	Indole	117	120-72-9	28.37	16514
4	1	Triune	Deep pit 2	8	Indole	117	120-72-9	28.37	2389
5	1	MMP	Outdoor storage	8	Indole	117	120-72-9	28.37	6262
6	1	MMP	Deep pit 2	8	Indole	117	120-72-9	28.37	16627
7	1	Sulfdox	Deep pit 1	8	Indole	117	120-72-9	28.37	2921
8	1	Sulfdox	Deep pit 2	8	Indole	117	120-72-9	28.37	11827
9	1	Control	Deep pit 2	8	Indole	117	120-72-9	28.37	49881
10	1	Sulfdox	Outdoor storage	8	Indole	117	120-72-9	28.37	73090
11	1	Control	Deep pit 1	8	Indole	117	120-72-9	28.37	2131
12	1	MMP	Deep pit 1	8	Indole	117	120-72-9	28.37	5419
13	1	Control	Outdoor storage	8	Indole	117	120-72-9	28.37	8270
14	1	Triune	Outdoor storage	8	Indole	117	120-72-9	28.37	12118
15	1	Confine	Deep pit 1	8	Indole	117	120-72-9	28.37	1750
1	1	Triune	Deep pit 1	-1	p-Cresol	107	106-44-5	23.32	296653
2	1	Confine	Outdoor storage	-1	p-Cresol	107	106-44-5	23.32	3634491
3	1	Confine	Deep pit 2	-1	p-Cresol	107	106-44-5	23.32	236989
4	1	Triune	Deep pit 2	-1	p-Cresol	107	106-44-5	23.32	427207
5	1	MMP	Outdoor storage	-1	p-Cresol	107	106-44-5	23.32	3954393
6	1	MMP	Deep pit 2	-1	p-Cresol	107	106-44-5	23.32	145446
7	1	Sulfdox	Deep pit 1	-1	p-Cresol	107	106-44-5	23.32	834654
8	1	Sulfdox	Deep pit 2	-1	p-Cresol	107	106-44-5	23.32	137781
9	1	Control	Deep pit 2	-1	p-Cresol	107	106-44-5	23.32	407323
10	1	Sulfdox	Outdoor storage	-1	p-Cresol	107	106-44-5	23.32	1630211
11	1	Control	Deep pit 1	-1	p-Cresol	107	106-44-5	23.32	239240
12	1	MMP	Deep pit 1	-1	p-Cresol	107	106-44-5	23.32	907162
13	1	Control	Outdoor storage	-1	p-Cresol	107	106-44-5	23.32	316112
14	1	Triune	Outdoor storage	-1	p-Cresol	107	106-44-5	23.32	558804
15	1	Confine	Deep pit 1	-1	p-Cresol	107	106-44-5	23.32	4185005
1	1	Triune	Deep pit 1	1	p-Cresol	107	106-44-5	23.32	583713
2	1	Confine	Outdoor storage	1	p-Cresol	107	106-44-5	23.32	4117637
3	1	Confine	Deep pit 2	1	p-Cresol	107	106-44-5	23.32	2729900
4	1	Triune	Deep pit 2	1	p-Cresol	107	106-44-5	23.32	849949
5	1	MMP	Outdoor storage	1	p-Cresol	107	106-44-5	23.32	1543616
6	1	MMP	Deep pit 2	1	p-Cresol	107	106-44-5	23.32	264385
7	1	Sulfdox	Deep pit 1	1	p-Cresol	107	106-44-5	23.32	1889606
8	1	Sulfdox	Deep pit 2	1	p-Cresol	107	106-44-5	23.32	199703
9	1	Control	Deep pit 2	1	p-Cresol	107	106-44-5	23.32	341074
10	1	Sulfdox	Outdoor storage	1	p-Cresol	107	106-44-5	23.32	399093
11	1	Control	Deep pit 1	1	p-Cresol	107	106-44-5	23.32	482459
12	1	MMP	Deep pit 1	1	p-Cresol	107	106-44-5	23.32	887774
13	1	Control	Outdoor storage	1	p-Cresol	107	106-44-5	23.32	803126
14	1	Triune	Outdoor storage	1	p-Cresol	107	106-44-5	23.32	7721561
15	1	Confine	Deep pit 1	1	p-Cresol	107	106-44-5	23.32	1160157
1	1	Triune	Deep pit 1	2	p-Cresol	107	106-44-5	23.32	236812
2	1	Confine	Outdoor storage	2	p-Cresol	107	106-44-5	23.32	5336561
3	1	Confine	Deep pit 2	2	p-Cresol	107	106-44-5	23.32	2555738
4	1	Triune	Deep pit 2	2	p-Cresol	107	106-44-5	23.32	839690
5	1	MMP	Outdoor storage	2	p-Cresol	107	106-44-5	23.32	598188
6	1	MMP	Deep pit 2	2	p-Cresol	107	106-44-5	23.32	162167
7	1	Sulfdox	Deep pit 1	2	p-Cresol	107	106-44-5	23.32	603404
8	1	Sulfdox	Deep pit 2	2	p-Cresol	107	106-44-5	23.32	246738
9	1	Control	Deep pit 2	2	p-Cresol	107	106-44-5	23.32	187554
10	1	Sulfdox	Outdoor storage	2	p-Cresol	107	106-44-5	23.32	352363
11	1	Control	Deep pit 1	2	p-Cresol	107	106-44-5	23.32	475155
12	1	MMP	Deep pit 1	2	p-Cresol	107	106-44-5	23.32	3354890
13	1	Control	Outdoor storage	2	p-Cresol	107	106-44-5	23.32	863898
14	1	Triune	Outdoor storage	2	p-Cresol	107	106-44-5	23.32	8265784
15	1	Confine	Deep pit 1	2	p-Cresol	107	106-44-5	23.32	203022
1	1	Triune	Deep pit 1	3	p-Cresol	107	106-44-5	23.32	791305
2	1	Confine	Outdoor storage	3	p-Cresol	107	106-44-5	23.32	10971936
3	1	Confine	Deep pit 2	3	p-Cresol	107	106-44-5	23.32	352694
4	1	Triune	Deep pit 2	3	p-Cresol	107	106-44-5	23.32	229961
5	1	MMP	Outdoor storage	3	p-Cresol	107	106-44-5	23.32	973379
6	1	MMP	Deep pit 2	3	p-Cresol	107	106-44-5	23.32	36688
7	1	Sulfdox	Deep pit 1	3	p-Cresol	107	106-44-5	23.32	1356585
8	1	Sulfdox	Deep pit 2	3	p-Cresol	107	106-44-5	23.32	92810
9	1	Control	Deep pit 2	3	p-Cresol	107	106-44-5	23.32	147952
10	1	Sulfdox	Outdoor storage	3	p-Cresol	107	106-44-5	23.32	730471
11	1	Control	Deep pit 1	3	p-Cresol	107	106-44-5	23.32	1055313
12	1	MMP	Deep pit 1	3	p-Cresol	107	106-44-5	23.32	1152117
13	1	Control	Outdoor storage	3	p-Cresol	107	106-44-5	23.32	971466
14	1	Triune	Outdoor storage	3	p-Cresol	107	106-44-5	23.32	10500416
15	1	Confine	Deep pit 1	3	p-Cresol	107	106-44-5	23.32	1358974
1	1	Triune	Deep pit 1	4	p-Cresol	107	106-44-5	23.32	313883
2	1	Confine	Outdoor storage	4	p-Cresol	107	106-44-5	23.32	4825195
3	1	Confine	Deep pit 2	4	p-Cresol	107	106-44-5	23.32	559827
4	1	Triune	Deep pit 2	4	p-Cresol	107	106-44-5	23.32	1019427
5	1	MMP	Outdoor storage	4	p-Cresol	107	106-44-5	23.32	315981
6	1	MMP	Deep pit 2	4	p-Cresol	107	106-44-5	23.32	20759
7	1	Sulfdox	Deep pit 1	4	p-Cresol	107	106-44-5	23.32	298933
8	1	Sulfdox	Deep pit 2	4	p-Cresol	107	106-44-5	23.32	22408
9	1	Control	Deep pit 2	4	p-Cresol	107	106-44-5	23.32	69855
10	1	Sulfdox	Outdoor storage	4	p-Cresol	107	106-44-5	23.32	115375
11	1	Control	Deep pit 1	4	p-Cresol	107	106-44-5	23.32	312739
12	1	MMP	Deep pit 1	4	p-Cresol	107	106-44-5	23.32	700650
13	1	Control	Outdoor storage	4	p-Cresol	107	106-44-5	23.32	853817
14	1	Triune	Outdoor storage	4	p-Cresol	107	106-44-5	23.32	429686
15	1	Confine	Deep pit 1	4	p-Cresol	107	106-44-5	23.32	427520
1	1	Triune	Deep pit 1	5	p-Cresol	107	106-44-5	23.32	718722
2	1	Confine	Outdoor storage	5	p-Cresol	107	106-44-5	23.32	3480612
3	1	Confine	Deep pit 2	5	p-Cresol	107	106-44-5	23.32	761205
4	1	Triune	Deep pit 2	5	p-Cresol	107	106-44-5	23.32	739068
5	1	MMP	Outdoor storage	5	p-Cresol	107	106-44-5	23.32	920385
6	1	MMP	Deep pit 2	5	p-Cresol	107	106-44-5	23.32	15322
7	1	Sulfdox	Deep pit 1	5	p-Cresol	107	106-44-5	23.32	509278
8	1	Sulfdox	Deep pit 2	5	p-Cresol	107	106-44-5	23.32	81198
9	1	Control	Deep pit 2	5	p-Cresol	107	106-44-5	23.32	416463
10	1	Sulfdox	Outdoor storage	5	p-Cresol	107	106-44-5	23.32	570688
11	1	Control	Deep pit 1	5	p-Cresol	107	106-44-5	23.32	893641
12	1	MMP	Deep pit 1	5	p-Cresol	107	106-44-5	23.32	479118
13	1	Control	Outdoor storage	5	p-Cresol	107	106-44-5	23.32	470265
14	1	Triune	Outdoor storage	5	p-Cresol	107	106-44-5	23.32	9878254
15	1	Confine	Deep pit 1	5	p-Cresol	107	106-44-5	23.32	1474095
1	1	Triune	Deep pit 1	6	p-Cresol	107	106-44-5	23.32	196717
2	1	Confine	Outdoor storage	6	p-Cresol	107	106-44-5	23.32	1254935
3	1	Confine	Deep pit 2	6	p-Cresol	107	106-44-5	23.32	1235083
4	1	Triune	Deep pit 2	6	p-Cresol	107	106-44-5	23.32	2259434
5	1	MMP	Outdoor storage	6	p-Cresol	107	106-44-5	23.32	466539
6	1	MMP	Deep pit 2	6	p-Cresol	107	106-44-5	23.32	84597
7	1	Sulfdox	Deep pit 1	6	p-Cresol	107	106-44-5	23.32	23.328
8	1	Sulfdox	Deep pit 2	6	p-Cresol	107	106-44-5	23.32	93880
9	1	Control	Deep pit 2	6	p-Cresol	107	106-44-5	23.32	678817
10	1	Sulfdox	Outdoor storage	6	p-Cresol	107	106-44-5	23.32	503542
11	1	Control	Deep pit 1	6	p-Cresol	107	106-44-5	23.32	129193
12	1	MMP	Deep pit 1	6	p-Cresol	107	106-44-5	23.32	591882
13	1	Control	Outdoor storage	6	p-Cresol	107	106-44-5	23.32	582803
14	1	Triune	Outdoor storage	6	p-Cresol	107	106-44-5	23.32	5503503
15	1	Confine	Deep pit 1	6	p-Cresol	107	106-44-5	23.32	281599
1	1	Triune	Deep pit 1	7	p-Cresol	107	106-44-5	23.32	442901
2	1	Confine	Outdoor storage	7	p-Cresol	107	106-44-5	23.32	3382506
3	1	Confine	Deep pit 2	7	p-Cresol	107	106-44-5	23.32	611212
4	1	Triune	Deep pit 2	7	p-Cresol	107	106-44-5	23.32	1031083
5	1	MMP	Outdoor storage	7	p-Cresol	107	106-44-5	23.32	1591812
6	1	MMP	Deep pit 2	7	p-Cresol	107	106-44-5	23.32	140350
7	1	Sulfdox	Deep pit 1	7	p-Cresol	107	106-44-5	23.32	75179
8	1	Sulfdox	Deep pit 2	7	p-Cresol	107	106-44-5	23.32	155090
9	1	Control	Deep pit 2	7	p-Cresol	107	106-44-5	23.32	813426
10	1	Sulfdox	Outdoor storage	7	p-Cresol	107	106-44-5	23.32	462310
11	1	Control	Deep pit 1	7	p-Cresol	107	106-44-5	23.32	645707
12	1	MMP	Deep pit 1	7	p-Cresol	107	106-44-5	23.32	765078
13	1	Control	Outdoor storage	7	p-Cresol	107	106-44-5	23.32	318973
14	1	Triune	Outdoor storage	7	p-Cresol	107	106-44-5	23.32	6983651
15	1	Confine	Deep pit 1	7	p-Cresol	107	106-44-5	23.32	637765
1	1	Triune	Deep pit 1	8	p-Cresol	107	106-44-5	23.32	202253
2	1	Confine	Outdoor storage	8	p-Cresol	107	106-44-5	23.32	1507068
3	1	Confine	Deep pit 2	8	p-Cresol	107	106-44-5	23.32	1660745
4	1	Triune	Deep pit 2	8	p-Cresol	107	106-44-5	23.32	165721
5	1	MMP	Outdoor storage	8	p-Cresol	107	106-44-5	23.32	88676
6	1	MMP	Deep pit 2	8	p-Cresol	107	106-44-5	23.32	589541
7	1	Sulfdox	Deep pit 1	8	p-Cresol	107	106-44-5	23.32	208674
8	1	Sulfdox	Deep pit 2	8	p-Cresol	107	106-44-5	23.32	477178
9	1	Control	Deep pit 2	8	p-Cresol	107	106-44-5	23.32	3221729
10	1	Sulfdox	Outdoor storage	8	p-Cresol	107	106-44-5	23.32	596515
11	1	Control	Deep pit 1	8	p-Cresol	107	106-44-5	23.32	279661
12	1	MMP	Deep pit 1	8	p-Cresol	107	106-44-5	23.32	366437
13	1	Control	Outdoor storage	8	p-Cresol	107	106-44-5	23.32	87604
14	1	Triune	Outdoor storage	8	p-Cresol	107	106-44-5	23.32	2044528
15	1	Confine	Deep pit 1	8	p-Cresol	107	106-44-5	23.32	399776
1	1	Triune	Deep pit 1	-1	Phenol	94	108-95-2	22.06	3530507
2	1	Confine	Outdoor storage	-1	Phenol	94	108-95-2	22.06	1054118
3	1	Confine	Deep pit 2	-1	Phenol	94	108-95-2	22.06	510144
4	1	Triune	Deep pit 2	-1	Phenol	94	108-95-2	22.06	375585
5	1	MMP	Outdoor storage	-1	Phenol	94	108-95-2	22.06	1359688
6	1	MMP	Deep pit 2	-1	Phenol	94	108-95-2	22.06	194051
7	1	Sulfdox	Deep pit 1	-1	Phenol	94	108-95-2	22.06	8843045
8	1	Sulfdox	Deep pit 2	-1	Phenol	94	108-95-2	22.06	136016
9	1	Control	Deep pit 2	-1	Phenol	94	108-95-2	22.06	821128
10	1	Sulfdox	Outdoor storage	-1	Phenol	94	108-95-2	22.06	6225798
11	1	Control	Deep pit 1	-1	Phenol	94	108-95-2	22.06	2582134
12	1	MMP	Deep pit 1	-1	Phenol	94	108-95-2	22.06	2227467
13	1	Control	Outdoor storage	-1	Phenol	94	108-95-2	22.06	1014307
14	1	Triune	Outdoor storage	-1	Phenol	94	108-95-2	22.06	3647612
15	1	Confine	Deep pit 1	-1	Phenol	94	108-95-2	22.06	1574312
1	1	Triune	Deep pit 1	1	Phenol	94	108-95-2	22.06	3487680
2	1	Confine	Outdoor storage	1	Phenol	94	108-95-2	22.06	1246127
3	1	Confine	Deep pit 2	1	Phenol	94	108-95-2	22.06	368618
4	1	Triune	Deep pit 2	1	Phenol	94	108-95-2	22.06	279653
5	1	MMP	Outdoor storage	1	Phenol	94	108-95-2	22.06	2555542
6	1	MMP	Deep pit 2	1	Phenol	94	108-95-2	22.06	126838
7	1	Sulfdox	Deep pit 1	1	Phenol	94	108-95-2	22.06	4711607
8	1	Sulfdox	Deep pit 2	1	Phenol	94	108-95-2	22.06	62070
9	1	Control	Deep pit 2	1	Phenol	94	108-95-2	22.06	322761
10	1	Sulfdox	Outdoor storage	1	Phenol	94	108-95-2	22.06	1134212
11	1	Control	Deep pit 1	1	Phenol	94	108-95-2	22.06	4189664
12	1	MMP	Deep pit 1	1	Phenol	94	108-95-2	22.06	2960758
13	1	Control	Outdoor storage	1	Phenol	94	108-95-2	22.06	1523952
14	1	Triune	Outdoor storage	1	Phenol	94	108-95-2	22.06	2062449
15	1	Confine	Deep pit 1	1	Phenol	94	108-95-2	22.06	4781942
1	1	Triune	Deep pit 1	2	Phenol	94	108-95-2	22.06	2588456
2	1	Confine	Outdoor storage	2	Phenol	94	108-95-2	22.06	1579613
3	1	Confine	Deep pit 2	2	Phenol	94	108-95-2	22.06	328893
4	1	Triune	Deep pit 2	2	Phenol	94	108-95-2	22.06	317520
5	1	MMP	Outdoor storage	2	Phenol	94	108-95-2	22.06	1709059
6	1	MMP	Deep pit 2	2	Phenol	94	108-95-2	22.06	61084
7	1	Sulfdox	Deep pit 1	2	Phenol	94	108-95-2	22.06	4550814
8	1	Sulfdox	Deep pit 2	2	Phenol	94	108-95-2	22.06	35876
9	1	Control	Deep pit 2	2	Phenol	94	108-95-2	22.06	171315
10	1	Sulfdox	Outdoor storage	2	Phenol	94	108-95-2	22.06	1658305
11	1	Control	Deep pit 1	2	Phenol	94	108-95-2	22.06	4641839
12	1	MMP	Deep pit 1	2	Phenol	94	108-95-2	22.06	1817853
13	1	Control	Outdoor storage	2	Phenol	94	108-95-2	22.06	2155567
14	1	Triune	Outdoor storage	2	Phenol	94	108-95-2	22.06	2124805
15	1	Confine	Deep pit 1	2	Phenol	94	108-95-2	22.06	3034018
1	1	Triune	Deep pit 1	3	Phenol	94	108-95-2	22.06	3955995
2	1	Confine	Outdoor storage	3	Phenol	94	108-95-2	22.06	2974206
3	1	Confine	Deep pit 2	3	Phenol	94	108-95-2	22.06	121855
4	1	Triune	Deep pit 2	3	Phenol	94	108-95-2	22.06	259302
5	1	MMP	Outdoor storage	3	Phenol	94	108-95-2	22.06	3793746
6	1	MMP	Deep pit 2	3	Phenol	94	108-95-2	22.06	60340
7	1	Sulfdox	Deep pit 1	3	Phenol	94	108-95-2	22.06	5045671
8	1	Sulfdox	Deep pit 2	3	Phenol	94	108-95-2	22.06	92343
9	1	Control	Deep pit 2	3	Phenol	94	108-95-2	22.06	210639
10	1	Sulfdox	Outdoor storage	3	Phenol	94	108-95-2	22.06	3377544
11	1	Control	Deep pit 1	3	Phenol	94	108-95-2	22.06	4312460
12	1	MMP	Deep pit 1	3	Phenol	94	108-95-2	22.06	2262558
13	1	Control	Outdoor storage	3	Phenol	94	108-95-2	22.06	3740053
14	1	Triune	Outdoor storage	3	Phenol	94	108-95-2	22.06	3203055
15	1	Confine	Deep pit 1	3	Phenol	94	108-95-2	22.06	4912683
1	1	Triune	Deep pit 1	4	Phenol	94	108-95-2	22.06	3371976
2	1	Confine	Outdoor storage	4	Phenol	94	108-95-2	22.06	1368857
3	1	Confine	Deep pit 2	4	Phenol	94	108-95-2	22.06	108534
4	1	Triune	Deep pit 2	4	Phenol	94	108-95-2	22.06	184693
5	1	MMP	Outdoor storage	4	Phenol	94	108-95-2	22.06	1154187
6	1	MMP	Deep pit 2	4	Phenol	94	108-95-2	22.06	39249
7	1	Sulfdox	Deep pit 1	4	Phenol	94	108-95-2	22.06	2407387
8	1	Sulfdox	Deep pit 2	4	Phenol	94	108-95-2	22.06	22402
9	1	Control	Deep pit 2	4	Phenol	94	108-95-2	22.06	78870
10	1	Sulfdox	Outdoor storage	4	Phenol	94	108-95-2	22.06	809824
11	1	Control	Deep pit 1	4	Phenol	94	108-95-2	22.06	2559049
12	1	MMP	Deep pit 1	4	Phenol	94	108-95-2	22.06	1846427
13	1	Control	Outdoor storage	4	Phenol	94	108-95-2	22.06	2446059
14	1	Triune	Outdoor storage	4	Phenol	94	108-95-2	22.06	3568462
15	1	Confine	Deep pit 1	4	Phenol	94	108-95-2	22.06	4674692
1	1	Triune	Deep pit 1	5	Phenol	94	108-95-2	22.06	3250244
2	1	Confine	Outdoor storage	5	Phenol	94	108-95-2	22.06	1621310
3	1	Confine	Deep pit 2	5	Phenol	94	108-95-2	22.06	134948
4	1	Triune	Deep pit 2	5	Phenol	94	108-95-2	22.06	292916
5	1	MMP	Outdoor storage	5	Phenol	94	108-95-2	22.06	3400710
6	1	MMP	Deep pit 2	5	Phenol	94	108-95-2	22.06	9595
7	1	Sulfdox	Deep pit 1	5	Phenol	94	108-95-2	22.06	1687840
8	1	Sulfdox	Deep pit 2	5	Phenol	94	108-95-2	22.06	29412
9	1	Control	Deep pit 2	5	Phenol	94	108-95-2	22.06	435865
10	1	Sulfdox	Outdoor storage	5	Phenol	94	108-95-2	22.06	2024259
11	1	Control	Deep pit 1	5	Phenol	94	108-95-2	22.06	3345684
12	1	MMP	Deep pit 1	5	Phenol	94	108-95-2	22.06	1307615
13	1	Control	Outdoor storage	5	Phenol	94	108-95-2	22.06	3654096
14	1	Triune	Outdoor storage	5	Phenol	94	108-95-2	22.06	2684885
15	1	Confine	Deep pit 1	5	Phenol	94	108-95-2	22.06	3909530
1	1	Triune	Deep pit 1	6	Phenol	94	108-95-2	22.06	868688
2	1	Confine	Outdoor storage	6	Phenol	94	108-95-2	22.06	929532
3	1	Confine	Deep pit 2	6	Phenol	94	108-95-2	22.06	237784
4	1	Triune	Deep pit 2	6	Phenol	94	108-95-2	22.06	263024
5	1	MMP	Outdoor storage	6	Phenol	94	108-95-2	22.06	1806240
6	1	MMP	Deep pit 2	6	Phenol	94	108-95-2	22.06	104161
7	1	Sulfdox	Deep pit 1	6	Phenol	94	108-95-2	22.06	343645
8	1	Sulfdox	Deep pit 2	6	Phenol	94	108-95-2	22.06	39701
9	1	Control	Deep pit 2	6	Phenol	94	108-95-2	22.06	269996
10	1	Sulfdox	Outdoor storage	6	Phenol	94	108-95-2	22.06	1329868
11	1	Control	Deep pit 1	6	Phenol	94	108-95-2	22.06	843463
12	1	MMP	Deep pit 1	6	Phenol	94	108-95-2	22.06	1023166
13	1	Control	Outdoor storage	6	Phenol	94	108-95-2	22.06	2716287
14	1	Triune	Outdoor storage	6	Phenol	94	108-95-2	22.06	1806367
15	1	Confine	Deep pit 1	6	Phenol	94	108-95-2	22.06	1463475
1	1	Triune	Deep pit 1	7	Phenol	94	108-95-2	22.06	1465718
2	1	Confine	Outdoor storage	7	Phenol	94	108-95-2	22.06	1650098
3	1	Confine	Deep pit 2	7	Phenol	94	108-95-2	22.06	772585
4	1	Triune	Deep pit 2	7	Phenol	94	108-95-2	22.06	360816
5	1	MMP	Outdoor storage	7	Phenol	94	108-95-2	22.06	3044269
6	1	MMP	Deep pit 2	7	Phenol	94	108-95-2	22.06	305048
7	1	Sulfdox	Deep pit 1	7	Phenol	94	108-95-2	22.06	44535
8	1	Sulfdox	Deep pit 2	7	Phenol	94	108-95-2	22.06	202179
9	1	Control	Deep pit 2	7	Phenol	94	108-95-2	22.06	515971
10	1	Sulfdox	Outdoor storage	7	Phenol	94	108-95-2	22.06	1348513
11	1	Control	Deep pit 1	7	Phenol	94	108-95-2	22.06	1033657
12	1	MMP	Deep pit 1	7	Phenol	94	108-95-2	22.06	681522
13	1	Control	Outdoor storage	7	Phenol	94	108-95-2	22.06	2901296
14	1	Triune	Outdoor storage	7	Phenol	94	108-95-2	22.06	2325336
15	1	Confine	Deep pit 1	7	Phenol	94	108-95-2	22.06	2103495
1	1	Triune	Deep pit 1	8	Phenol	94	108-95-2	22.06	300734
2	1	Confine	Outdoor storage	8	Phenol	94	108-95-2	22.06	1494344
3	1	Confine	Deep pit 2	8	Phenol	94	108-95-2	22.06	1676007
4	1	Triune	Deep pit 2	8	Phenol	94	108-95-2	22.06	168463
5	1	MMP	Outdoor storage	8	Phenol	94	108-95-2	22.06	2587300
6	1	MMP	Deep pit 2	8	Phenol	94	108-95-2	22.06	380050
7	1	Sulfdox	Deep pit 1	8	Phenol	94	108-95-2	22.06	62002
8	1	Sulfdox	Deep pit 2	8	Phenol	94	108-95-2	22.06	551057
9	1	Control	Deep pit 2	8	Phenol	94	108-95-2	22.06	1153971
10	1	Sulfdox	Outdoor storage	8	Phenol	94	108-95-2	22.06	1388606
11	1	Control	Deep pit 1	8	Phenol	94	108-95-2	22.06	207996
12	1	MMP	Deep pit 1	8	Phenol	94	108-95-2	22.06	572455
13	1	Control	Outdoor storage	8	Phenol	94	108-95-2	22.06	1239528
14	1	Triune	Outdoor storage	8	Phenol	94	108-95-2	22.06	964562
15	1	Confine	Deep pit 1	8	Phenol	94	108-95-2	22.06	1251731
1	1	Triune	Deep pit 1	-1	4-ethyl phenol	107	123-07-9	24.77	1214022
2	1	Confine	Outdoor storage	-1	4-ethyl phenol	107	123-07-9	24.77	1313778
3	1	Confine	Deep pit 2	-1	4-ethyl phenol	107	123-07-9	24.77	284029
4	1	Triune	Deep pit 2	-1	4-ethyl phenol	107	123-07-9	24.77	214836
5	1	MMP	Outdoor storage	-1	4-ethyl phenol	107	123-07-9	24.77	1445553
6	1	MMP	Deep pit 2	-1	4-ethyl phenol	107	123-07-9	24.77	260039
7	1	Sulfdox	Deep pit 1	-1	4-ethyl phenol	107	123-07-9	24.77	3727369
8	1	Sulfdox	Deep pit 2	-1	4-ethyl phenol	107	123-07-9	24.77	2823
9	1	Control	Deep pit 2	-1	4-ethyl phenol	107	123-07-9	24.77	861596
10	1	Sulfdox	Outdoor storage	-1	4-ethyl phenol	107	123-07-9	24.77	4554076
11	1	Control	Deep pit 1	-1	4-ethyl phenol	107	123-07-9	24.77	1009118
12	1	MMP	Deep pit 1	-1	4-ethyl phenol	107	123-07-9	24.77	1642359
13	1	Control	Outdoor storage	-1	4-ethyl phenol	107	123-07-9	24.77	476148
14	1	Triune	Outdoor storage	-1	4-ethyl phenol	107	123-07-9	24.77	1751184
15	1	Confine	Deep pit 1	-1	4-ethyl phenol	107	123-07-9	24.77	2581613
1	1	Triune	Deep pit 1	1	4-ethyl phenol	107	123-07-9	24.77	1247775
2	1	Confine	Outdoor storage	1	4-ethyl phenol	107	123-07-9	24.77	1400940
3	1	Confine	Deep pit 2	1	4-ethyl phenol	107	123-07-9	24.77	539996
4	1	Triune	Deep pit 2	1	4-ethyl phenol	107	123-07-9	24.77	444470
5	1	MMP	Outdoor storage	1	4-ethyl phenol	107	123-07-9	24.77	2447207
6	1	MMP	Deep pit 2	1	4-ethyl phenol	107	123-07-9	24.77	367462
7	1	Sulfdox	Deep pit 1	1	4-ethyl phenol	107	123-07-9	24.77	2283122
8	1	Sulfdox	Deep pit 2	1	4-ethyl phenol	107	123-07-9	24.77	208904
9	1	Control	Deep pit 2	1	4-ethyl phenol	107	123-07-9	24.77	533507
10	1	Sulfdox	Outdoor storage	1	4-ethyl phenol	107	123-07-9	24.77	1049661
11	1	Control	Deep pit 1	1	4-ethyl phenol	107	123-07-9	24.77	1981084
12	1	MMP	Deep pit 1	1	4-ethyl phenol	107	123-07-9	24.77	1758154
13	1	Control	Outdoor storage	1	4-ethyl phenol	107	123-07-9	24.77	1143138
14	1	Triune	Outdoor storage	1	4-ethyl phenol	107	123-07-9	24.77	1815921
15	1	Confine	Deep pit 1	1	4-ethyl phenol	107	123-07-9	24.77	1160157
1	1	Triune	Deep pit 1	2	4-ethyl phenol	107	123-07-9	24.77	1163169
2	1	Confine	Outdoor storage	2	4-ethyl phenol	107	123-07-9	24.77	1985388
3	1	Confine	Deep pit 2	2	4-ethyl phenol	107	123-07-9	24.77	538030
4	1	Triune	Deep pit 2	2	4-ethyl phenol	107	123-07-9	24.77	562873
5	1	MMP	Outdoor storage	2	4-ethyl phenol	107	123-07-9	24.77	1488072
6	1	MMP	Deep pit 2	2	4-ethyl phenol	107	123-07-9	24.77	161373
7	1	Sulfdox	Deep pit 1	2	4-ethyl phenol	107	123-07-9	24.77	2354477
8	1	Sulfdox	Deep pit 2	2	4-ethyl phenol	107	123-07-9	24.77	236948
9	1	Control	Deep pit 2	2	4-ethyl phenol	107	123-07-9	24.77	401957
10	1	Sulfdox	Outdoor storage	2	4-ethyl phenol	107	123-07-9	24.77	1156428
11	1	Control	Deep pit 1	2	4-ethyl phenol	107	123-07-9	24.77	2842578
12	1	MMP	Deep pit 1	2	4-ethyl phenol	107	123-07-9	24.77	897601
13	1	Control	Outdoor storage	2	4-ethyl phenol	107	123-07-9	24.77	1370692
14	1	Triune	Outdoor storage	2	4-ethyl phenol	107	123-07-9	24.77	3124380
15	1	Confine	Deep pit 1	2	4-ethyl phenol	107	123-07-9	24.77	1466250
1	1	Triune	Deep pit 1	3	4-ethyl phenol	107	123-07-9	24.77	2328032
2	1	Confine	Outdoor storage	3	4-ethyl phenol	107	123-07-9	24.77	3503140
3	1	Confine	Deep pit 2	3	4-ethyl phenol	107	123-07-9	24.77	299285
4	1	Triune	Deep pit 2	3	4-ethyl phenol	107	123-07-9	24.77	233814
5	1	MMP	Outdoor storage	3	4-ethyl phenol	107	123-07-9	24.77	2651922
6	1	MMP	Deep pit 2	3	4-ethyl phenol	107	123-07-9	24.77	127563
7	1	Sulfdox	Deep pit 1	3	4-ethyl phenol	107	123-07-9	24.77	3693762
8	1	Sulfdox	Deep pit 2	3	4-ethyl phenol	107	123-07-9	24.77	165525
9	1	Control	Deep pit 2	3	4-ethyl phenol	107	123-07-9	24.77	318863
10	1	Sulfdox	Outdoor storage	3	4-ethyl phenol	107	123-07-9	24.77	1950607
11	1	Control	Deep pit 1	3	4-ethyl phenol	107	123-07-9	24.77	2496112
12	1	MMP	Deep pit 1	3	4-ethyl phenol	107	123-07-9	24.77	1468609
13	1	Control	Outdoor storage	3	4-ethyl phenol	107	123-07-9	24.77	1985402
14	1	Triune	Outdoor storage	3	4-ethyl phenol	107	123-07-9	24.77	3653676
15	1	Confine	Deep pit 1	3	4-ethyl phenol	107	123-07-9	24.77	2651330
1	1	Triune	Deep pit 1	4	4-ethyl phenol	107	123-07-9	24.77	1316455
2	1	Confine	Outdoor storage	4	4-ethyl phenol	107	123-07-9	24.77	1038348
3	1	Confine	Deep pit 2	4	4-ethyl phenol	107	123-07-9	24.77	341996
4	1	Triune	Deep pit 2	4	4-ethyl phenol	107	123-07-9	24.77	535409
5	1	MMP	Outdoor storage	4	4-ethyl phenol	107	123-07-9	24.77	927506
6	1	MMP	Deep pit 2	4	4-ethyl phenol	107	123-07-9	24.77	85037
7	1	Sulfdox	Deep pit 1	4	4-ethyl phenol	107	123-07-9	24.77	2360848
8	1	Sulfdox	Deep pit 2	4	4-ethyl phenol	107	123-07-9	24.77	99622
9	1	Control	Deep pit 2	4	4-ethyl phenol	107	123-07-9	24.77	205372
10	1	Sulfdox	Outdoor storage	4	4-ethyl phenol	107	123-07-9	24.77	508534
11	1	Control	Deep pit 1	4	4-ethyl phenol	107	123-07-9	24.77	1883546
12	1	MMP	Deep pit 1	4	4-ethyl phenol	107	123-07-9	24.77	2197314
13	1	Control	Outdoor storage	4	4-ethyl phenol	107	123-07-9	24.77	1409774
14	1	Triune	Outdoor storage	4	4-ethyl phenol	107	123-07-9	24.77	1582986
15	1	Confine	Deep pit 1	4	4-ethyl phenol	107	123-07-9	24.77	2026273
1	1	Triune	Deep pit 1	5	4-ethyl phenol	107	123-07-9	24.77	2394855
2	1	Confine	Outdoor storage	5	4-ethyl phenol	107	123-07-9	24.77	1438781
3	1	Confine	Deep pit 2	5	4-ethyl phenol	107	123-07-9	24.77	662297
4	1	Triune	Deep pit 2	5	4-ethyl phenol	107	123-07-9	24.77	411495
5	1	MMP	Outdoor storage	5	4-ethyl phenol	107	123-07-9	24.77	1675119
6	1	MMP	Deep pit 2	5	4-ethyl phenol	107	123-07-9	24.77	56822
7	1	Sulfdox	Deep pit 1	5	4-ethyl phenol	107	123-07-9	24.77	2429942
8	1	Sulfdox	Deep pit 2	5	4-ethyl phenol	107	123-07-9	24.77	170672
9	1	Control	Deep pit 2	5	4-ethyl phenol	107	123-07-9	24.77	310166
10	1	Sulfdox	Outdoor storage	5	4-ethyl phenol	107	123-07-9	24.77	1483580
11	1	Control	Deep pit 1	5	4-ethyl phenol	107	123-07-9	24.77	3768058
12	1	MMP	Deep pit 1	5	4-ethyl phenol	107	123-07-9	24.77	2879264
13	1	Control	Outdoor storage	5	4-ethyl phenol	107	123-07-9	24.77	1973929
14	1	Triune	Outdoor storage	5	4-ethyl phenol	107	123-07-9	24.77	45553
15	1	Confine	Deep pit 1	5	4-ethyl phenol	107	123-07-9	24.77	3015815
1	1	Triune	Deep pit 1	6	4-ethyl phenol	107	123-07-9	24.77	1507485
2	1	Confine	Outdoor storage	6	4-ethyl phenol	107	123-07-9	24.77	690764
3	1	Confine	Deep pit 2	6	4-ethyl phenol	107	123-07-9	24.77	793192
4	1	Triune	Deep pit 2	6	4-ethyl phenol	107	123-07-9	24.77	32884
5	1	MMP	Outdoor storage	6	4-ethyl phenol	107	123-07-9	24.77	1502473
6	1	MMP	Deep pit 2	6	4-ethyl phenol	107	123-07-9	24.77	232065
7	1	Sulfdox	Deep pit 1	6	4-ethyl phenol	107	123-07-9	24.77	1541637
8	1	Sulfdox	Deep pit 2	6	4-ethyl phenol	107	123-07-9	24.77	277381
9	1	Control	Deep pit 2	6	4-ethyl phenol	107	123-07-9	24.77	418650
10	1	Sulfdox	Outdoor storage	6	4-ethyl phenol	107	123-07-9	24.77	1217525
11	1	Control	Deep pit 1	6	4-ethyl phenol	107	123-07-9	24.77	757795
12	1	MMP	Deep pit 1	6	4-ethyl phenol	107	123-07-9	24.77	4000
13	1	Control	Outdoor storage	6	4-ethyl phenol	107	123-07-9	24.77	1918064
14	1	Triune	Outdoor storage	6	4-ethyl phenol	107	123-07-9	24.77	1825779
15	1	Confine	Deep pit 1	6	4-ethyl phenol	107	123-07-9	24.77	1810918
1	1	Triune	Deep pit 1	7	4-ethyl phenol	107	123-07-9	24.77	2043700
2	1	Confine	Outdoor storage	7	4-ethyl phenol	107	123-07-9	24.77	1873049
3	1	Confine	Deep pit 2	7	4-ethyl phenol	107	123-07-9	24.77	197843
4	1	Triune	Deep pit 2	7	4-ethyl phenol	107	123-07-9	24.77	309242
5	1	MMP	Outdoor storage	7	4-ethyl phenol	107	123-07-9	24.77	2013219
6	1	MMP	Deep pit 2	7	4-ethyl phenol	107	123-07-9	24.77	245235
7	1	Sulfdox	Deep pit 1	7	4-ethyl phenol	107	123-07-9	24.77	664934
8	1	Sulfdox	Deep pit 2	7	4-ethyl phenol	107	123-07-9	24.77	355912
9	1	Control	Deep pit 2	7	4-ethyl phenol	107	123-07-9	24.77	788052
10	1	Sulfdox	Outdoor storage	7	4-ethyl phenol	107	123-07-9	24.77	821348
11	1	Control	Deep pit 1	7	4-ethyl phenol	107	123-07-9	24.77	2896971
12	1	MMP	Deep pit 1	7	4-ethyl phenol	107	123-07-9	24.77	4291379
13	1	Control	Outdoor storage	7	4-ethyl phenol	107	123-07-9	24.77	964338
14	1	Triune	Outdoor storage	7	4-ethyl phenol	107	123-07-9	24.77	2432768
15	1	Confine	Deep pit 1	7	4-ethyl phenol	107	123-07-9	24.77	2170748
1	1	Triune	Deep pit 1	8	4-ethyl phenol	107	123-07-9	24.77	1913811
2	1	Confine	Outdoor storage	8	4-ethyl phenol	107	123-07-9	24.77	1497308
3	1	Confine	Deep pit 2	8	4-ethyl phenol	107	123-07-9	24.77	880947
4	1	Triune	Deep pit 2	8	4-ethyl phenol	107	123-07-9	24.77	176636
5	1	MMP	Outdoor storage	8	4-ethyl phenol	107	123-07-9	24.77	944985
6	1	MMP	Deep pit 2	8	4-ethyl phenol	107	123-07-9	24.77	466620
7	1	Sulfdox	Deep pit 1	8	4-ethyl phenol	107	123-07-9	24.77	2520229
8	1	Sulfdox	Deep pit 2	8	4-ethyl phenol	107	123-07-9	24.77	671205
9	1	Control	Deep pit 2	8	4-ethyl phenol	107	123-07-9	24.77	1924632
10	1	Sulfdox	Outdoor storage	8	4-ethyl phenol	107	123-07-9	24.77	1454298
11	1	Control	Deep pit 1	8	4-ethyl phenol	107	123-07-9	24.77	2799572
12	1	MMP	Deep pit 1	8	4-ethyl phenol	107	123-07-9	24.77	3517388
13	1	Control	Outdoor storage	8	4-ethyl phenol	107	123-07-9	24.77	652551
14	1	Triune	Outdoor storage	8	4-ethyl phenol	107	123-07-9	24.77	809762
15	1	Confine	Deep pit 1	8	4-ethyl phenol	107	123-07-9	24.77	3173767
1	1	Triune	Deep pit 1	-1	Di methyl di sulfide	94	624-92-0	7.03	10242
2	1	Confine	Outdoor storage	-1	Di methyl di sulfide	94	624-92-0	7.03	0
3	1	Confine	Deep pit 2	-1	Di methyl di sulfide	94	624-92-0	7.03	12126
4	1	Triune	Deep pit 2	-1	Di methyl di sulfide	94	624-92-0	7.03	0
5	1	MMP	Outdoor storage	-1	Di methyl di sulfide	94	624-92-0	7.03	0
6	1	MMP	Deep pit 2	-1	Di methyl di sulfide	94	624-92-0	7.03	0
7	1	Sulfdox	Deep pit 1	-1	Di methyl di sulfide	94	624-92-0	7.03	0
8	1	Sulfdox	Deep pit 2	-1	Di methyl di sulfide	94	624-92-0	7.03	0
9	1	Control	Deep pit 2	-1	Di methyl di sulfide	94	624-92-0	7.03	0
10	1	Sulfdox	Outdoor storage	-1	Di methyl di sulfide	94	624-92-0	7.03	0
11	1	Control	Deep pit 1	-1	Di methyl di sulfide	94	624-92-0	7.03	0
12	1	MMP	Deep pit 1	-1	Di methyl di sulfide	94	624-92-0	7.03	0
13	1	Control	Outdoor storage	-1	Di methyl di sulfide	94	624-92-0	7.03	0
14	1	Triune	Outdoor storage	-1	Di methyl di sulfide	94	624-92-0	7.03	0
15	1	Confine	Deep pit 1	-1	Di methyl di sulfide	94	624-92-0	7.03	0
1	1	Triune	Deep pit 1	1	Di methyl di sulfide	94	624-92-0	7.03	3644
2	1	Confine	Outdoor storage	1	Di methyl di sulfide	94	624-92-0	7.03	1568
3	1	Confine	Deep pit 2	1	Di methyl di sulfide	94	624-92-0	7.03	13447
4	1	Triune	Deep pit 2	1	Di methyl di sulfide	94	624-92-0	7.03	6670
5	1	MMP	Outdoor storage	1	Di methyl di sulfide	94	624-92-0	7.03	0
6	1	MMP	Deep pit 2	1	Di methyl di sulfide	94	624-92-0	7.03	35471
7	1	Sulfdox	Deep pit 1	1	Di methyl di sulfide	94	624-92-0	7.03	0
8	1	Sulfdox	Deep pit 2	1	Di methyl di sulfide	94	624-92-0	7.03	23674
9	1	Control	Deep pit 2	1	Di methyl di sulfide	94	624-92-0	7.03	8944
10	1	Sulfdox	Outdoor storage	1	Di methyl di sulfide	94	624-92-0	7.03	0
11	1	Control	Deep pit 1	1	Di methyl di sulfide	94	624-92-0	7.03	0
12	1	MMP	Deep pit 1	1	Di methyl di sulfide	94	624-92-0	7.03	4683
13	1	Control	Outdoor storage	1	Di methyl di sulfide	94	624-92-0	7.03	2367
14	1	Triune	Outdoor storage	1	Di methyl di sulfide	94	624-92-0	7.03	0
15	1	Confine	Deep pit 1	1	Di methyl di sulfide	94	624-92-0	7.03	0
1	1	Triune	Deep pit 1	2	Di methyl di sulfide	94	624-92-0	7.03	13333
2	1	Confine	Outdoor storage	2	Di methyl di sulfide	94	624-92-0	7.03	6551
3	1	Confine	Deep pit 2	2	Di methyl di sulfide	94	624-92-0	7.03	13934
4	1	Triune	Deep pit 2	2	Di methyl di sulfide	94	624-92-0	7.03	0
5	1	MMP	Outdoor storage	2	Di methyl di sulfide	94	624-92-0	7.03	3349
6	1	MMP	Deep pit 2	2	Di methyl di sulfide	94	624-92-0	7.03	21918
7	1	Sulfdox	Deep pit 1	2	Di methyl di sulfide	94	624-92-0	7.03	0
8	1	Sulfdox	Deep pit 2	2	Di methyl di sulfide	94	624-92-0	7.03	22560
9	1	Control	Deep pit 2	2	Di methyl di sulfide	94	624-92-0	7.03	11154
10	1	Sulfdox	Outdoor storage	2	Di methyl di sulfide	94	624-92-0	7.03	5260
11	1	Control	Deep pit 1	2	Di methyl di sulfide	94	624-92-0	7.03	0
12	1	MMP	Deep pit 1	2	Di methyl di sulfide	94	624-92-0	7.03	4901
13	1	Control	Outdoor storage	2	Di methyl di sulfide	94	624-92-0	7.03	3319
14	1	Triune	Outdoor storage	2	Di methyl di sulfide	94	624-92-0	7.03	2714
15	1	Confine	Deep pit 1	2	Di methyl di sulfide	94	624-92-0	7.03	1928
1	1	Triune	Deep pit 1	3	Di methyl di sulfide	94	624-92-0	7.03	6088
2	1	Confine	Outdoor storage	3	Di methyl di sulfide	94	624-92-0	7.03	7010
3	1	Confine	Deep pit 2	3	Di methyl di sulfide	94	624-92-0	7.03	29587
4	1	Triune	Deep pit 2	3	Di methyl di sulfide	94	624-92-0	7.03	12489
5	1	MMP	Outdoor storage	3	Di methyl di sulfide	94	624-92-0	7.03	7966
6	1	MMP	Deep pit 2	3	Di methyl di sulfide	94	624-92-0	7.03	102213
7	1	Sulfdox	Deep pit 1	3	Di methyl di sulfide	94	624-92-0	7.03	5710
8	1	Sulfdox	Deep pit 2	3	Di methyl di sulfide	94	624-92-0	7.03	66387
9	1	Control	Deep pit 2	3	Di methyl di sulfide	94	624-92-0	7.03	35799
10	1	Sulfdox	Outdoor storage	3	Di methyl di sulfide	94	624-92-0	7.03	11208
11	1	Control	Deep pit 1	3	Di methyl di sulfide	94	624-92-0	7.03	5676
12	1	MMP	Deep pit 1	3	Di methyl di sulfide	94	624-92-0	7.03	7605
13	1	Control	Outdoor storage	3	Di methyl di sulfide	94	624-92-0	7.03	10180
14	1	Triune	Outdoor storage	3	Di methyl di sulfide	94	624-92-0	7.03	5290
15	1	Confine	Deep pit 1	3	Di methyl di sulfide	94	624-92-0	7.03	7411
1	1	Triune	Deep pit 1	4	Di methyl di sulfide	94	624-92-0	7.03	11047
2	1	Confine	Outdoor storage	4	Di methyl di sulfide	94	624-92-0	7.03	8826
3	1	Confine	Deep pit 2	4	Di methyl di sulfide	94	624-92-0	7.03	24871
4	1	Triune	Deep pit 2	4	Di methyl di sulfide	94	624-92-0	7.03	152821
5	1	MMP	Outdoor storage	4	Di methyl di sulfide	94	624-92-0	7.03	15908
6	1	MMP	Deep pit 2	4	Di methyl di sulfide	94	624-92-0	7.03	42491
7	1	Sulfdox	Deep pit 1	4	Di methyl di sulfide	94	624-92-0	7.03	9528
8	1	Sulfdox	Deep pit 2	4	Di methyl di sulfide	94	624-92-0	7.03	37599
9	1	Control	Deep pit 2	4	Di methyl di sulfide	94	624-92-0	7.03	27280
10	1	Sulfdox	Outdoor storage	4	Di methyl di sulfide	94	624-92-0	7.03	9216
11	1	Control	Deep pit 1	4	Di methyl di sulfide	94	624-92-0	7.03	8337
12	1	MMP	Deep pit 1	4	Di methyl di sulfide	94	624-92-0	7.03	26636
13	1	Control	Outdoor storage	4	Di methyl di sulfide	94	624-92-0	7.03	28202
14	1	Triune	Outdoor storage	4	Di methyl di sulfide	94	624-92-0	7.03	11897
15	1	Confine	Deep pit 1	4	Di methyl di sulfide	94	624-92-0	7.03	13804
1	1	Triune	Deep pit 1	5	Di methyl di sulfide	94	624-92-0	7.03	12875
2	1	Confine	Outdoor storage	5	Di methyl di sulfide	94	624-92-0	7.03	9249
3	1	Confine	Deep pit 2	5	Di methyl di sulfide	94	624-92-0	7.03	18938
4	1	Triune	Deep pit 2	5	Di methyl di sulfide	94	624-92-0	7.03	11500
5	1	MMP	Outdoor storage	5	Di methyl di sulfide	94	624-92-0	7.03	8174
6	1	MMP	Deep pit 2	5	Di methyl di sulfide	94	624-92-0	7.03	139814
7	1	Sulfdox	Deep pit 1	5	Di methyl di sulfide	94	624-92-0	7.03	9984
8	1	Sulfdox	Deep pit 2	5	Di methyl di sulfide	94	624-92-0	7.03	44880
9	1	Control	Deep pit 2	5	Di methyl di sulfide	94	624-92-0	7.03	38589
10	1	Sulfdox	Outdoor storage	5	Di methyl di sulfide	94	624-92-0	7.03	12156
11	1	Control	Deep pit 1	5	Di methyl di sulfide	94	624-92-0	7.03	13705
12	1	MMP	Deep pit 1	5	Di methyl di sulfide	94	624-92-0	7.03	8972
13	1	Control	Outdoor storage	5	Di methyl di sulfide	94	624-92-0	7.03	9900
14	1	Triune	Outdoor storage	5	Di methyl di sulfide	94	624-92-0	7.03	13738
15	1	Confine	Deep pit 1	5	Di methyl di sulfide	94	624-92-0	7.03	8221
1	1	Triune	Deep pit 1	6	Di methyl di sulfide	94	624-92-0	7.03	10493
2	1	Confine	Outdoor storage	6	Di methyl di sulfide	94	624-92-0	7.03	15018
3	1	Confine	Deep pit 2	6	Di methyl di sulfide	94	624-92-0	7.03	20347
4	1	Triune	Deep pit 2	6	Di methyl di sulfide	94	624-92-0	7.03	18684
5	1	MMP	Outdoor storage	6	Di methyl di sulfide	94	624-92-0	7.03	19447
6	1	MMP	Deep pit 2	6	Di methyl di sulfide	94	624-92-0	7.03	41278
7	1	Sulfdox	Deep pit 1	6	Di methyl di sulfide	94	624-92-0	7.03	13666
8	1	Sulfdox	Deep pit 2	6	Di methyl di sulfide	94	624-92-0	7.03	44289
9	1	Control	Deep pit 2	6	Di methyl di sulfide	94	624-92-0	7.03	21437
10	1	Sulfdox	Outdoor storage	6	Di methyl di sulfide	94	624-92-0	7.03	14622
11	1	Control	Deep pit 1	6	Di methyl di sulfide	94	624-92-0	7.03	14393
12	1	MMP	Deep pit 1	6	Di methyl di sulfide	94	624-92-0	7.03	18673
13	1	Control	Outdoor storage	6	Di methyl di sulfide	94	624-92-0	7.03	13844
14	1	Triune	Outdoor storage	6	Di methyl di sulfide	94	624-92-0	7.03	11865
15	1	Confine	Deep pit 1	6	Di methyl di sulfide	94	624-92-0	7.03	12626
1	1	Triune	Deep pit 1	7	Di methyl di sulfide	94	624-92-0	7.03	7051
2	1	Confine	Outdoor storage	7	Di methyl di sulfide	94	624-92-0	7.03	13825
3	1	Confine	Deep pit 2	7	Di methyl di sulfide	94	624-92-0	7.03	23651
4	1	Triune	Deep pit 2	7	Di methyl di sulfide	94	624-92-0	7.03	14925
5	1	MMP	Outdoor storage	7	Di methyl di sulfide	94	624-92-0	7.03	9884
6	1	MMP	Deep pit 2	7	Di methyl di sulfide	94	624-92-0	7.03	89445
7	1	Sulfdox	Deep pit 1	7	Di methyl di sulfide	94	624-92-0	7.03	9384
8	1	Sulfdox	Deep pit 2	7	Di methyl di sulfide	94	624-92-0	7.03	64076
9	1	Control	Deep pit 2	7	Di methyl di sulfide	94	624-92-0	7.03	34398
10	1	Sulfdox	Outdoor storage	7	Di methyl di sulfide	94	624-92-0	7.03	4213
11	1	Control	Deep pit 1	7	Di methyl di sulfide	94	624-92-0	7.03	12543
12	1	MMP	Deep pit 1	7	Di methyl di sulfide	94	624-92-0	7.03	13035
13	1	Control	Outdoor storage	7	Di methyl di sulfide	94	624-92-0	7.03	12184
14	1	Triune	Outdoor storage	7	Di methyl di sulfide	94	624-92-0	7.03	4361
15	1	Confine	Deep pit 1	7	Di methyl di sulfide	94	624-92-0	7.03	12225
1	1	Triune	Deep pit 1	8	Di methyl di sulfide	94	624-92-0	7.03	20556
2	1	Confine	Outdoor storage	8	Di methyl di sulfide	94	624-92-0	7.03	14406
3	1	Confine	Deep pit 2	8	Di methyl di sulfide	94	624-92-0	7.03	28531
4	1	Triune	Deep pit 2	8	Di methyl di sulfide	94	624-92-0	7.03	32912
5	1	MMP	Outdoor storage	8	Di methyl di sulfide	94	624-92-0	7.03	7792
6	1	MMP	Deep pit 2	8	Di methyl di sulfide	94	624-92-0	7.03	44772
7	1	Sulfdox	Deep pit 1	8	Di methyl di sulfide	94	624-92-0	7.03	16749
8	1	Sulfdox	Deep pit 2	8	Di methyl di sulfide	94	624-92-0	7.03	39736
9	1	Control	Deep pit 2	8	Di methyl di sulfide	94	624-92-0	7.03	51220
10	1	Sulfdox	Outdoor storage	8	Di methyl di sulfide	94	624-92-0	7.03	11281
11	1	Control	Deep pit 1	8	Di methyl di sulfide	94	624-92-0	7.03	5373
12	1	MMP	Deep pit 1	8	Di methyl di sulfide	94	624-92-0	7.03	10451
13	1	Control	Outdoor storage	8	Di methyl di sulfide	94	624-92-0	7.03	18236
14	1	Triune	Outdoor storage	8	Di methyl di sulfide	94	624-92-0	7.03	12674
15	1	Confine	Deep pit 1	8	Di methyl di sulfide	94	624-92-0	7.03	19105
1	1	Triune	Deep pit 1	-1	Di ethyl di sulfide	122	110-81-6	11.47	72735
2	1	Confine	Outdoor storage	-1	Di ethyl di sulfide	122	110-81-6	11.47	67341
3	1	Confine	Deep pit 2	-1	Di ethyl di sulfide	122	110-81-6	11.47	63354
4	1	Triune	Deep pit 2	-1	Di ethyl di sulfide	122	110-81-6	11.47	68504
5	1	MMP	Outdoor storage	-1	Di ethyl di sulfide	122	110-81-6	11.47	66918
6	1	MMP	Deep pit 2	-1	Di ethyl di sulfide	122	110-81-6	11.47	11262
7	1	Sulfdox	Deep pit 1	-1	Di ethyl di sulfide	122	110-81-6	11.47	11060
8	1	Sulfdox	Deep pit 2	-1	Di ethyl di sulfide	122	110-81-6	11.47	14718
9	1	Control	Deep pit 2	-1	Di ethyl di sulfide	122	110-81-6	11.47	0
10	1	Sulfdox	Outdoor storage	-1	Di ethyl di sulfide	122	110-81-6	11.47	7242
11	1	Control	Deep pit 1	-1	Di ethyl di sulfide	122	110-81-6	11.47	0
12	1	MMP	Deep pit 1	-1	Di ethyl di sulfide	122	110-81-6	11.47	0
13	1	Control	Outdoor storage	-1	Di ethyl di sulfide	122	110-81-6	11.47	0
14	1	Triune	Outdoor storage	-1	Di ethyl di sulfide	122	110-81-6	11.47	4068
15	1	Confine	Deep pit 1	-1	Di ethyl di sulfide	122	110-81-6	11.47	12154
1	1	Triune	Deep pit 1	1	Di ethyl di sulfide	122	110-81-6	11.47	0
2	1	Confine	Outdoor storage	1	Di ethyl di sulfide	122	110-81-6	11.47	1462
3	1	Confine	Deep pit 2	1	Di ethyl di sulfide	122	110-81-6	11.47	2258
4	1	Triune	Deep pit 2	1	Di ethyl di sulfide	122	110-81-6	11.47	0
5	1	MMP	Outdoor storage	1	Di ethyl di sulfide	122	110-81-6	11.47	1800
6	1	MMP	Deep pit 2	1	Di ethyl di sulfide	122	110-81-6	11.47	2669
7	1	Sulfdox	Deep pit 1	1	Di ethyl di sulfide	122	110-81-6	11.47	0
8	1	Sulfdox	Deep pit 2	1	Di ethyl di sulfide	122	110-81-6	11.47	2486
9	1	Control	Deep pit 2	1	Di ethyl di sulfide	122	110-81-6	11.47	2064
10	1	Sulfdox	Outdoor storage	1	Di ethyl di sulfide	122	110-81-6	11.47	2155
11	1	Control	Deep pit 1	1	Di ethyl di sulfide	122	110-81-6	11.47	0
12	1	MMP	Deep pit 1	1	Di ethyl di sulfide	122	110-81-6	11.47	0
13	1	Control	Outdoor storage	1	Di ethyl di sulfide	122	110-81-6	11.47	1807
14	1	Triune	Outdoor storage	1	Di ethyl di sulfide	122	110-81-6	11.47	0
15	1	Confine	Deep pit 1	1	Di ethyl di sulfide	122	110-81-6	11.47	0
1	1	Triune	Deep pit 1	2	Di ethyl di sulfide	122	110-81-6	11.47	2054
2	1	Confine	Outdoor storage	2	Di ethyl di sulfide	122	110-81-6	11.47	2584
3	1	Confine	Deep pit 2	2	Di ethyl di sulfide	122	110-81-6	11.47	0
4	1	Triune	Deep pit 2	2	Di ethyl di sulfide	122	110-81-6	11.47	0
5	1	MMP	Outdoor storage	2	Di ethyl di sulfide	122	110-81-6	11.47	2388
6	1	MMP	Deep pit 2	2	Di ethyl di sulfide	122	110-81-6	11.47	0
7	1	Sulfdox	Deep pit 1	2	Di ethyl di sulfide	122	110-81-6	11.47	2297
8	1	Sulfdox	Deep pit 2	2	Di ethyl di sulfide	122	110-81-6	11.47	3871
9	1	Control	Deep pit 2	2	Di ethyl di sulfide	122	110-81-6	11.47	4628
10	1	Sulfdox	Outdoor storage	2	Di ethyl di sulfide	122	110-81-6	11.47	3720
11	1	Control	Deep pit 1	2	Di ethyl di sulfide	122	110-81-6	11.47	2491
12	1	MMP	Deep pit 1	2	Di ethyl di sulfide	122	110-81-6	11.47	2105
13	1	Control	Outdoor storage	2	Di ethyl di sulfide	122	110-81-6	11.47	2411
14	1	Triune	Outdoor storage	2	Di ethyl di sulfide	122	110-81-6	11.47	0
15	1	Confine	Deep pit 1	2	Di ethyl di sulfide	122	110-81-6	11.47	1899
1	1	Triune	Deep pit 1	3	Di ethyl di sulfide	122	110-81-6	11.47	4404
2	1	Confine	Outdoor storage	3	Di ethyl di sulfide	122	110-81-6	11.47	5681
3	1	Confine	Deep pit 2	3	Di ethyl di sulfide	122	110-81-6	11.47	5047
4	1	Triune	Deep pit 2	3	Di ethyl di sulfide	122	110-81-6	11.47	5018
5	1	MMP	Outdoor storage	3	Di ethyl di sulfide	122	110-81-6	11.47	6078
6	1	MMP	Deep pit 2	3	Di ethyl di sulfide	122	110-81-6	11.47	5661
7	1	Sulfdox	Deep pit 1	3	Di ethyl di sulfide	122	110-81-6	11.47	5710
8	1	Sulfdox	Deep pit 2	3	Di ethyl di sulfide	122	110-81-6	11.47	6233
9	1	Control	Deep pit 2	3	Di ethyl di sulfide	122	110-81-6	11.47	7164
10	1	Sulfdox	Outdoor storage	3	Di ethyl di sulfide	122	110-81-6	11.47	6560
11	1	Control	Deep pit 1	3	Di ethyl di sulfide	122	110-81-6	11.47	3717
12	1	MMP	Deep pit 1	3	Di ethyl di sulfide	122	110-81-6	11.47	0
13	1	Control	Outdoor storage	3	Di ethyl di sulfide	122	110-81-6	11.47	6702
14	1	Triune	Outdoor storage	3	Di ethyl di sulfide	122	110-81-6	11.47	0
15	1	Confine	Deep pit 1	3	Di ethyl di sulfide	122	110-81-6	11.47	3294
1	1	Triune	Deep pit 1	4	Di ethyl di sulfide	122	110-81-6	11.47	8439
2	1	Confine	Outdoor storage	4	Di ethyl di sulfide	122	110-81-6	11.47	6246
3	1	Confine	Deep pit 2	4	Di ethyl di sulfide	122	110-81-6	11.47	2848
4	1	Triune	Deep pit 2	4	Di ethyl di sulfide	122	110-81-6	11.47	5614
5	1	MMP	Outdoor storage	4	Di ethyl di sulfide	122	110-81-6	11.47	0
6	1	MMP	Deep pit 2	4	Di ethyl di sulfide	122	110-81-6	11.47	4266
7	1	Sulfdox	Deep pit 1	4	Di ethyl di sulfide	122	110-81-6	11.47	6210
8	1	Sulfdox	Deep pit 2	4	Di ethyl di sulfide	122	110-81-6	11.47	0
9	1	Control	Deep pit 2	4	Di ethyl di sulfide	122	110-81-6	11.47	4343
10	1	Sulfdox	Outdoor storage	4	Di ethyl di sulfide	122	110-81-6	11.47	5001
11	1	Control	Deep pit 1	4	Di ethyl di sulfide	122	110-81-6	11.47	8077
12	1	MMP	Deep pit 1	4	Di ethyl di sulfide	122	110-81-6	11.47	8818
13	1	Control	Outdoor storage	4	Di ethyl di sulfide	122	110-81-6	11.47	9050
14	1	Triune	Outdoor storage	4	Di ethyl di sulfide	122	110-81-6	11.47	7930
15	1	Confine	Deep pit 1	4	Di ethyl di sulfide	122	110-81-6	11.47	11748
1	1	Triune	Deep pit 1	5	Di ethyl di sulfide	122	110-81-6	11.47	7359
2	1	Confine	Outdoor storage	5	Di ethyl di sulfide	122	110-81-6	11.47	4644
3	1	Confine	Deep pit 2	5	Di ethyl di sulfide	122	110-81-6	11.47	6492
4	1	Triune	Deep pit 2	5	Di ethyl di sulfide	122	110-81-6	11.47	7676
5	1	MMP	Outdoor storage	5	Di ethyl di sulfide	122	110-81-6	11.47	4603
6	1	MMP	Deep pit 2	5	Di ethyl di sulfide	122	110-81-6	11.47	6481
7	1	Sulfdox	Deep pit 1	5	Di ethyl di sulfide	122	110-81-6	11.47	7636
8	1	Sulfdox	Deep pit 2	5	Di ethyl di sulfide	122	110-81-6	11.47	6966
9	1	Control	Deep pit 2	5	Di ethyl di sulfide	122	110-81-6	11.47	8632
10	1	Sulfdox	Outdoor storage	5	Di ethyl di sulfide	122	110-81-6	11.47	15140
11	1	Control	Deep pit 1	5	Di ethyl di sulfide	122	110-81-6	11.47	7702
12	1	MMP	Deep pit 1	5	Di ethyl di sulfide	122	110-81-6	11.47	6984
13	1	Control	Outdoor storage	5	Di ethyl di sulfide	122	110-81-6	11.47	4974
14	1	Triune	Outdoor storage	5	Di ethyl di sulfide	122	110-81-6	11.47	18035
15	1	Confine	Deep pit 1	5	Di ethyl di sulfide	122	110-81-6	11.47	7818
1	1	Triune	Deep pit 1	6	Di ethyl di sulfide	122	110-81-6	11.47	14469
2	1	Confine	Outdoor storage	6	Di ethyl di sulfide	122	110-81-6	11.47	10909
3	1	Confine	Deep pit 2	6	Di ethyl di sulfide	122	110-81-6	11.47	10533
4	1	Triune	Deep pit 2	6	Di ethyl di sulfide	122	110-81-6	11.47	9211
5	1	MMP	Outdoor storage	6	Di ethyl di sulfide	122	110-81-6	11.47	9385
6	1	MMP	Deep pit 2	6	Di ethyl di sulfide	122	110-81-6	11.47	11513
7	1	Sulfdox	Deep pit 1	6	Di ethyl di sulfide	122	110-81-6	11.47	16529
8	1	Sulfdox	Deep pit 2	6	Di ethyl di sulfide	122	110-81-6	11.47	13248
9	1	Control	Deep pit 2	6	Di ethyl di sulfide	122	110-81-6	11.47	11301
10	1	Sulfdox	Outdoor storage	6	Di ethyl di sulfide	122	110-81-6	11.47	8170
11	1	Control	Deep pit 1	6	Di ethyl di sulfide	122	110-81-6	11.47	18506
12	1	MMP	Deep pit 1	6	Di ethyl di sulfide	122	110-81-6	11.47	20142
13	1	Control	Outdoor storage	6	Di ethyl di sulfide	122	110-81-6	11.47	8018
14	1	Triune	Outdoor storage	6	Di ethyl di sulfide	122	110-81-6	11.47	8718
15	1	Confine	Deep pit 1	6	Di ethyl di sulfide	122	110-81-6	11.47	23163
1	1	Triune	Deep pit 1	7	Di ethyl di sulfide	122	110-81-6	11.47	5006
2	1	Confine	Outdoor storage	7	Di ethyl di sulfide	122	110-81-6	11.47	9475
3	1	Confine	Deep pit 2	7	Di ethyl di sulfide	122	110-81-6	11.47	9560
4	1	Triune	Deep pit 2	7	Di ethyl di sulfide	122	110-81-6	11.47	2965
5	1	MMP	Outdoor storage	7	Di ethyl di sulfide	122	110-81-6	11.47	5199
6	1	MMP	Deep pit 2	7	Di ethyl di sulfide	122	110-81-6	11.47	4377
7	1	Sulfdox	Deep pit 1	7	Di ethyl di sulfide	122	110-81-6	11.47	4106
8	1	Sulfdox	Deep pit 2	7	Di ethyl di sulfide	122	110-81-6	11.47	10097
9	1	Control	Deep pit 2	7	Di ethyl di sulfide	122	110-81-6	11.47	7690
10	1	Sulfdox	Outdoor storage	7	Di ethyl di sulfide	122	110-81-6	11.47	1886
11	1	Control	Deep pit 1	7	Di ethyl di sulfide	122	110-81-6	11.47	10093
12	1	MMP	Deep pit 1	7	Di ethyl di sulfide	122	110-81-6	11.47	12033
13	1	Control	Outdoor storage	7	Di ethyl di sulfide	122	110-81-6	11.47	8521
14	1	Triune	Outdoor storage	7	Di ethyl di sulfide	122	110-81-6	11.47	1541
15	1	Confine	Deep pit 1	7	Di ethyl di sulfide	122	110-81-6	11.47	11158
1	1	Triune	Deep pit 1	8	Di ethyl di sulfide	122	110-81-6	11.47	12449
2	1	Confine	Outdoor storage	8	Di ethyl di sulfide	122	110-81-6	11.47	11675
3	1	Confine	Deep pit 2	8	Di ethyl di sulfide	122	110-81-6	11.47	9813
4	1	Triune	Deep pit 2	8	Di ethyl di sulfide	122	110-81-6	11.47	10876
5	1	MMP	Outdoor storage	8	Di ethyl di sulfide	122	110-81-6	11.47	3534
6	1	MMP	Deep pit 2	8	Di ethyl di sulfide	122	110-81-6	11.47	7692
7	1	Sulfdox	Deep pit 1	8	Di ethyl di sulfide	122	110-81-6	11.47	8351
8	1	Sulfdox	Deep pit 2	8	Di ethyl di sulfide	122	110-81-6	11.47	7867
9	1	Control	Deep pit 2	8	Di ethyl di sulfide	122	110-81-6	11.47	13941
10	1	Sulfdox	Outdoor storage	8	Di ethyl di sulfide	122	110-81-6	11.47	8215
11	1	Control	Deep pit 1	8	Di ethyl di sulfide	122	110-81-6	11.47	2644
12	1	MMP	Deep pit 1	8	Di ethyl di sulfide	122	110-81-6	11.47	14614
13	1	Control	Outdoor storage	8	Di ethyl di sulfide	122	110-81-6	11.47	10037
14	1	Triune	Outdoor storage	8	Di ethyl di sulfide	122	110-81-6	11.47	6900
15	1	Confine	Deep pit 1	8	Di ethyl di sulfide	122	110-81-6	11.47	16459
1	1	Triune	Deep pit 1	-1	Di methyl tri sulfide	74	3600-24-6	13.9	10957
2	1	Confine	Outdoor storage	-1	Di methyl tri sulfide	74	3600-24-6	13.9	7744
3	1	Confine	Deep pit 2	-1	Di methyl tri sulfide	74	3600-24-6	13.9	31520
4	1	Triune	Deep pit 2	-1	Di methyl tri sulfide	74	3600-24-6	13.9	13500
5	1	MMP	Outdoor storage	-1	Di methyl tri sulfide	74	3600-24-6	13.9	8348
6	1	MMP	Deep pit 2	-1	Di methyl tri sulfide	74	3600-24-6	13.9	10584
7	1	Sulfdox	Deep pit 1	-1	Di methyl tri sulfide	74	3600-24-6	13.9	9699
8	1	Sulfdox	Deep pit 2	-1	Di methyl tri sulfide	74	3600-24-6	13.9	21631
9	1	Control	Deep pit 2	-1	Di methyl tri sulfide	74	3600-24-6	13.9	22165
10	1	Sulfdox	Outdoor storage	-1	Di methyl tri sulfide	74	3600-24-6	13.9	8489
11	1	Control	Deep pit 1	-1	Di methyl tri sulfide	74	3600-24-6	13.9	0
12	1	MMP	Deep pit 1	-1	Di methyl tri sulfide	74	3600-24-6	13.9	0
13	1	Control	Outdoor storage	-1	Di methyl tri sulfide	74	3600-24-6	13.9	3687
14	1	Triune	Outdoor storage	-1	Di methyl tri sulfide	74	3600-24-6	13.9	3724
15	1	Confine	Deep pit 1	-1	Di methyl tri sulfide	74	3600-24-6	13.9	9086
1	1	Triune	Deep pit 1	1	Di methyl tri sulfide	74	3600-24-6	13.9	4737
2	1	Confine	Outdoor storage	1	Di methyl tri sulfide	74	3600-24-6	13.9	3375
3	1	Confine	Deep pit 2	1	Di methyl tri sulfide	74	3600-24-6	13.9	8123
4	1	Triune	Deep pit 2	1	Di methyl tri sulfide	74	3600-24-6	13.9	10008
5	1	MMP	Outdoor storage	1	Di methyl tri sulfide	74	3600-24-6	13.9	3853
6	1	MMP	Deep pit 2	1	Di methyl tri sulfide	74	3600-24-6	13.9	15811
7	1	Sulfdox	Deep pit 1	1	Di methyl tri sulfide	74	3600-24-6	13.9	8778
8	1	Sulfdox	Deep pit 2	1	Di methyl tri sulfide	74	3600-24-6	13.9	39856
9	1	Control	Deep pit 2	1	Di methyl tri sulfide	74	3600-24-6	13.9	10944
10	1	Sulfdox	Outdoor storage	1	Di methyl tri sulfide	74	3600-24-6	13.9	0
11	1	Control	Deep pit 1	1	Di methyl tri sulfide	74	3600-24-6	13.9	12688
12	1	MMP	Deep pit 1	1	Di methyl tri sulfide	74	3600-24-6	13.9	7932
13	1	Control	Outdoor storage	1	Di methyl tri sulfide	74	3600-24-6	13.9	8739
14	1	Triune	Outdoor storage	1	Di methyl tri sulfide	74	3600-24-6	13.9	14659
15	1	Confine	Deep pit 1	1	Di methyl tri sulfide	74	3600-24-6	13.9	12409
1	1	Triune	Deep pit 1	2	Di methyl tri sulfide	74	3600-24-6	13.9	4111
2	1	Confine	Outdoor storage	2	Di methyl tri sulfide	74	3600-24-6	13.9	2414
3	1	Confine	Deep pit 2	2	Di methyl tri sulfide	74	3600-24-6	13.9	0
4	1	Triune	Deep pit 2	2	Di methyl tri sulfide	74	3600-24-6	13.9	7210
5	1	MMP	Outdoor storage	2	Di methyl tri sulfide	74	3600-24-6	13.9	2123
6	1	MMP	Deep pit 2	2	Di methyl tri sulfide	74	3600-24-6	13.9	2847
7	1	Sulfdox	Deep pit 1	2	Di methyl tri sulfide	74	3600-24-6	13.9	7395
8	1	Sulfdox	Deep pit 2	2	Di methyl tri sulfide	74	3600-24-6	13.9	9186
9	1	Control	Deep pit 2	2	Di methyl tri sulfide	74	3600-24-6	13.9	2702
10	1	Sulfdox	Outdoor storage	2	Di methyl tri sulfide	74	3600-24-6	13.9	4451
11	1	Control	Deep pit 1	2	Di methyl tri sulfide	74	3600-24-6	13.9	4673
12	1	MMP	Deep pit 1	2	Di methyl tri sulfide	74	3600-24-6	13.9	7647
13	1	Control	Outdoor storage	2	Di methyl tri sulfide	74	3600-24-6	13.9	0
14	1	Triune	Outdoor storage	2	Di methyl tri sulfide	74	3600-24-6	13.9	6153
15	1	Confine	Deep pit 1	2	Di methyl tri sulfide	74	3600-24-6	13.9	2248
1	1	Triune	Deep pit 1	3	Di methyl tri sulfide	74	3600-24-6	13.9	10033
2	1	Confine	Outdoor storage	3	Di methyl tri sulfide	74	3600-24-6	13.9	4680
3	1	Confine	Deep pit 2	3	Di methyl tri sulfide	74	3600-24-6	13.9	6014
4	1	Triune	Deep pit 2	3	Di methyl tri sulfide	74	3600-24-6	13.9	10530
5	1	MMP	Outdoor storage	3	Di methyl tri sulfide	74	3600-24-6	13.9	2648
6	1	MMP	Deep pit 2	3	Di methyl tri sulfide	74	3600-24-6	13.9	3945
7	1	Sulfdox	Deep pit 1	3	Di methyl tri sulfide	74	3600-24-6	13.9	0
8	1	Sulfdox	Deep pit 2	3	Di methyl tri sulfide	74	3600-24-6	13.9	10334
9	1	Control	Deep pit 2	3	Di methyl tri sulfide	74	3600-24-6	13.9	16012
10	1	Sulfdox	Outdoor storage	3	Di methyl tri sulfide	74	3600-24-6	13.9	2381
11	1	Control	Deep pit 1	3	Di methyl tri sulfide	74	3600-24-6	13.9	3835
12	1	MMP	Deep pit 1	3	Di methyl tri sulfide	74	3600-24-6	13.9	0
13	1	Control	Outdoor storage	3	Di methyl tri sulfide	74	3600-24-6	13.9	2196
14	1	Triune	Outdoor storage	3	Di methyl tri sulfide	74	3600-24-6	13.9	5869
15	1	Confine	Deep pit 1	3	Di methyl tri sulfide	74	3600-24-6	13.9	0
1	1	Triune	Deep pit 1	4	Di methyl tri sulfide	74	3600-24-6	13.9	18865
2	1	Confine	Outdoor storage	4	Di methyl tri sulfide	74	3600-24-6	13.9	0
3	1	Confine	Deep pit 2	4	Di methyl tri sulfide	74	3600-24-6	13.9	2848
4	1	Triune	Deep pit 2	4	Di methyl tri sulfide	74	3600-24-6	13.9	5614
5	1	MMP	Outdoor storage	4	Di methyl tri sulfide	74	3600-24-6	13.9	1169
6	1	MMP	Deep pit 2	4	Di methyl tri sulfide	74	3600-24-6	13.9	0
7	1	Sulfdox	Deep pit 1	4	Di methyl tri sulfide	74	3600-24-6	13.9	4841
8	1	Sulfdox	Deep pit 2	4	Di methyl tri sulfide	74	3600-24-6	13.9	0
9	1	Control	Deep pit 2	4	Di methyl tri sulfide	74	3600-24-6	13.9	4343
10	1	Sulfdox	Outdoor storage	4	Di methyl tri sulfide	74	3600-24-6	13.9	0
11	1	Control	Deep pit 1	4	Di methyl tri sulfide	74	3600-24-6	13.9	2391
12	1	MMP	Deep pit 1	4	Di methyl tri sulfide	74	3600-24-6	13.9	6871
13	1	Control	Outdoor storage	4	Di methyl tri sulfide	74	3600-24-6	13.9	5737
14	1	Triune	Outdoor storage	4	Di methyl tri sulfide	74	3600-24-6	13.9	4288
15	1	Confine	Deep pit 1	4	Di methyl tri sulfide	74	3600-24-6	13.9	7007
1	1	Triune	Deep pit 1	5	Di methyl tri sulfide	74	3600-24-6	13.9	5316
2	1	Confine	Outdoor storage	5	Di methyl tri sulfide	74	3600-24-6	13.9	4273
3	1	Confine	Deep pit 2	5	Di methyl tri sulfide	74	3600-24-6	13.9	7149
4	1	Triune	Deep pit 2	5	Di methyl tri sulfide	74	3600-24-6	13.9	5224
5	1	MMP	Outdoor storage	5	Di methyl tri sulfide	74	3600-24-6	13.9	2181
6	1	MMP	Deep pit 2	5	Di methyl tri sulfide	74	3600-24-6	13.9	0
7	1	Sulfdox	Deep pit 1	5	Di methyl tri sulfide	74	3600-24-6	13.9	2632
8	1	Sulfdox	Deep pit 2	5	Di methyl tri sulfide	74	3600-24-6	13.9	4426
9	1	Control	Deep pit 2	5	Di methyl tri sulfide	74	3600-24-6	13.9	3477
10	1	Sulfdox	Outdoor storage	5	Di methyl tri sulfide	74	3600-24-6	13.9	0
11	1	Control	Deep pit 1	5	Di methyl tri sulfide	74	3600-24-6	13.9	4492
12	1	MMP	Deep pit 1	5	Di methyl tri sulfide	74	3600-24-6	13.9	3566
13	1	Control	Outdoor storage	5	Di methyl tri sulfide	74	3600-24-6	13.9	2220
14	1	Triune	Outdoor storage	5	Di methyl tri sulfide	74	3600-24-6	13.9	0
15	1	Confine	Deep pit 1	5	Di methyl tri sulfide	74	3600-24-6	13.9	0
1	1	Triune	Deep pit 1	6	Di methyl tri sulfide	74	3600-24-6	13.9	0
2	1	Confine	Outdoor storage	6	Di methyl tri sulfide	74	3600-24-6	13.9	616
3	1	Confine	Deep pit 2	6	Di methyl tri sulfide	74	3600-24-6	13.9	6076
4	1	Triune	Deep pit 2	6	Di methyl tri sulfide	74	3600-24-6	13.9	6622
5	1	MMP	Outdoor storage	6	Di methyl tri sulfide	74	3600-24-6	13.9	2645
6	1	MMP	Deep pit 2	6	Di methyl tri sulfide	74	3600-24-6	13.9	10397
7	1	Sulfdox	Deep pit 1	6	Di methyl tri sulfide	74	3600-24-6	13.9	0
8	1	Sulfdox	Deep pit 2	6	Di methyl tri sulfide	74	3600-24-6	13.9	5482
9	1	Control	Deep pit 2	6	Di methyl tri sulfide	74	3600-24-6	13.9	6023
10	1	Sulfdox	Outdoor storage	6	Di methyl tri sulfide	74	3600-24-6	13.9	3532
11	1	Control	Deep pit 1	6	Di methyl tri sulfide	74	3600-24-6	13.9	0
12	1	MMP	Deep pit 1	6	Di methyl tri sulfide	74	3600-24-6	13.9	0
13	1	Control	Outdoor storage	6	Di methyl tri sulfide	74	3600-24-6	13.9	6081
14	1	Triune	Outdoor storage	6	Di methyl tri sulfide	74	3600-24-6	13.9	1790
15	1	Confine	Deep pit 1	6	Di methyl tri sulfide	74	3600-24-6	13.9	0
1	1	Triune	Deep pit 1	7	Di methyl tri sulfide	74	3600-24-6	13.9	2542
2	1	Confine	Outdoor storage	7	Di methyl tri sulfide	74	3600-24-6	13.9	0
3	1	Confine	Deep pit 2	7	Di methyl tri sulfide	74	3600-24-6	13.9	1164
4	1	Triune	Deep pit 2	7	Di methyl tri sulfide	74	3600-24-6	13.9	2121
5	1	MMP	Outdoor storage	7	Di methyl tri sulfide	74	3600-24-6	13.9	0
6	1	MMP	Deep pit 2	7	Di methyl tri sulfide	74	3600-24-6	13.9	0
7	1	Sulfdox	Deep pit 1	7	Di methyl tri sulfide	74	3600-24-6	13.9	0
8	1	Sulfdox	Deep pit 2	7	Di methyl tri sulfide	74	3600-24-6	13.9	5764
9	1	Control	Deep pit 2	7	Di methyl tri sulfide	74	3600-24-6	13.9	4233
10	1	Sulfdox	Outdoor storage	7	Di methyl tri sulfide	74	3600-24-6	13.9	1411
11	1	Control	Deep pit 1	7	Di methyl tri sulfide	74	3600-24-6	13.9	2992
12	1	MMP	Deep pit 1	7	Di methyl tri sulfide	74	3600-24-6	13.9	4385
13	1	Control	Outdoor storage	7	Di methyl tri sulfide	74	3600-24-6	13.9	1316
14	1	Triune	Outdoor storage	7	Di methyl tri sulfide	74	3600-24-6	13.9	1466
15	1	Confine	Deep pit 1	7	Di methyl tri sulfide	74	3600-24-6	13.9	3534
1	1	Triune	Deep pit 1	8	Di methyl tri sulfide	74	3600-24-6	13.9	3282
2	1	Confine	Outdoor storage	8	Di methyl tri sulfide	74	3600-24-6	13.9	0
3	1	Confine	Deep pit 2	8	Di methyl tri sulfide	74	3600-24-6	13.9	6419
4	1	Triune	Deep pit 2	8	Di methyl tri sulfide	74	3600-24-6	13.9	1738
5	1	MMP	Outdoor storage	8	Di methyl tri sulfide	74	3600-24-6	13.9	0
6	1	MMP	Deep pit 2	8	Di methyl tri sulfide	74	3600-24-6	13.9	5671
7	1	Sulfdox	Deep pit 1	8	Di methyl tri sulfide	74	3600-24-6	13.9	2379
8	1	Sulfdox	Deep pit 2	8	Di methyl tri sulfide	74	3600-24-6	13.9	8491
9	1	Control	Deep pit 2	8	Di methyl tri sulfide	74	3600-24-6	13.9	17848
10	1	Sulfdox	Outdoor storage	8	Di methyl tri sulfide	74	3600-24-6	13.9	0
11	1	Control	Deep pit 1	8	Di methyl tri sulfide	74	3600-24-6	13.9	2662
12	1	MMP	Deep pit 1	8	Di methyl tri sulfide	74	3600-24-6	13.9	2743
13	1	Control	Outdoor storage	8	Di methyl tri sulfide	74	3600-24-6	13.9	0
14	1	Triune	Outdoor storage	8	Di methyl tri sulfide	74	3600-24-6	13.9	0
15	1	Confine	Deep pit 1	8	Di methyl tri sulfide	74	3600-24-6	13.9	6116
1	1	Triune	Deep pit 1	-1	Acetic acid	60	64-19-7	12.6	0
2	1	Confine	Outdoor storage	-1	Acetic acid	60	64-19-7	12.6	0
3	1	Confine	Deep pit 2	-1	Acetic acid	60	64-19-7	12.6	0
4	1	Triune	Deep pit 2	-1	Acetic acid	60	64-19-7	12.6	13190
5	1	MMP	Outdoor storage	-1	Acetic acid	60	64-19-7	12.6	0
6	1	MMP	Deep pit 2	-1	Acetic acid	60	64-19-7	12.6	17140
7	1	Sulfdox	Deep pit 1	-1	Acetic acid	60	64-19-7	12.6	0
8	1	Sulfdox	Deep pit 2	-1	Acetic acid	60	64-19-7	12.6	27519
9	1	Control	Deep pit 2	-1	Acetic acid	60	64-19-7	12.6	5461
10	1	Sulfdox	Outdoor storage	-1	Acetic acid	60	64-19-7	12.6	47772
11	1	Control	Deep pit 1	-1	Acetic acid	60	64-19-7	12.6	0
12	1	MMP	Deep pit 1	-1	Acetic acid	60	64-19-7	12.6	0
13	1	Control	Outdoor storage	-1	Acetic acid	60	64-19-7	12.6	0
14	1	Triune	Outdoor storage	-1	Acetic acid	60	64-19-7	12.6	10442
15	1	Confine	Deep pit 1	-1	Acetic acid	60	64-19-7	12.6	66612
1	1	Triune	Deep pit 1	1	Acetic acid	60	64-19-7	12.6	24197
2	1	Confine	Outdoor storage	1	Acetic acid	60	64-19-7	12.6	0
3	1	Confine	Deep pit 2	1	Acetic acid	60	64-19-7	12.6	0
4	1	Triune	Deep pit 2	1	Acetic acid	60	64-19-7	12.6	19292
5	1	MMP	Outdoor storage	1	Acetic acid	60	64-19-7	12.6	0
6	1	MMP	Deep pit 2	1	Acetic acid	60	64-19-7	12.6	14536
7	1	Sulfdox	Deep pit 1	1	Acetic acid	60	64-19-7	12.6	29326
8	1	Sulfdox	Deep pit 2	1	Acetic acid	60	64-19-7	12.6	53715
9	1	Control	Deep pit 2	1	Acetic acid	60	64-19-7	12.6	0
10	1	Sulfdox	Outdoor storage	1	Acetic acid	60	64-19-7	12.6	9315
11	1	Control	Deep pit 1	1	Acetic acid	60	64-19-7	12.6	0
12	1	MMP	Deep pit 1	1	Acetic acid	60	64-19-7	12.6	0
13	1	Control	Outdoor storage	1	Acetic acid	60	64-19-7	12.6	8124
14	1	Triune	Outdoor storage	1	Acetic acid	60	64-19-7	12.6	15386
15	1	Confine	Deep pit 1	1	Acetic acid	60	64-19-7	12.6	0
1	1	Triune	Deep pit 1	2	Acetic acid	60	64-19-7	12.6	0
2	1	Confine	Outdoor storage	2	Acetic acid	60	64-19-7	12.6	0
3	1	Confine	Deep pit 2	2	Acetic acid	60	64-19-7	12.6	142830
4	1	Triune	Deep pit 2	2	Acetic acid	60	64-19-7	12.6	76027
5	1	MMP	Outdoor storage	2	Acetic acid	60	64-19-7	12.6	1302
6	1	MMP	Deep pit 2	2	Acetic acid	60	64-19-7	12.6	46890
7	1	Sulfdox	Deep pit 1	2	Acetic acid	60	64-19-7	12.6	0
8	1	Sulfdox	Deep pit 2	2	Acetic acid	60	64-19-7	12.6	8922
9	1	Control	Deep pit 2	2	Acetic acid	60	64-19-7	12.6	0
10	1	Sulfdox	Outdoor storage	2	Acetic acid	60	64-19-7	12.6	0
11	1	Control	Deep pit 1	2	Acetic acid	60	64-19-7	12.6	0
12	1	MMP	Deep pit 1	2	Acetic acid	60	64-19-7	12.6	17385
13	1	Control	Outdoor storage	2	Acetic acid	60	64-19-7	12.6	4660
14	1	Triune	Outdoor storage	2	Acetic acid	60	64-19-7	12.6	10718
15	1	Confine	Deep pit 1	2	Acetic acid	60	64-19-7	12.6	4789
1	1	Triune	Deep pit 1	3	Acetic acid	60	64-19-7	12.6	119780
2	1	Confine	Outdoor storage	3	Acetic acid	60	64-19-7	12.6	0
3	1	Confine	Deep pit 2	3	Acetic acid	60	64-19-7	12.6	9009
4	1	Triune	Deep pit 2	3	Acetic acid	60	64-19-7	12.6	0
5	1	MMP	Outdoor storage	3	Acetic acid	60	64-19-7	12.6	0
6	1	MMP	Deep pit 2	3	Acetic acid	60	64-19-7	12.6	4856
7	1	Sulfdox	Deep pit 1	3	Acetic acid	60	64-19-7	12.6	397813
8	1	Sulfdox	Deep pit 2	3	Acetic acid	60	64-19-7	12.6	21339
9	1	Control	Deep pit 2	3	Acetic acid	60	64-19-7	12.6	16251
10	1	Sulfdox	Outdoor storage	3	Acetic acid	60	64-19-7	12.6	0
11	1	Control	Deep pit 1	3	Acetic acid	60	64-19-7	12.6	66863
12	1	MMP	Deep pit 1	3	Acetic acid	60	64-19-7	12.6	285941
13	1	Control	Outdoor storage	3	Acetic acid	60	64-19-7	12.6	4341
14	1	Triune	Outdoor storage	3	Acetic acid	60	64-19-7	12.6	0
15	1	Confine	Deep pit 1	3	Acetic acid	60	64-19-7	12.6	255615
1	1	Triune	Deep pit 1	4	Acetic acid	60	64-19-7	12.6	0
2	1	Confine	Outdoor storage	4	Acetic acid	60	64-19-7	12.6	0
3	1	Confine	Deep pit 2	4	Acetic acid	60	64-19-7	12.6	0
4	1	Triune	Deep pit 2	4	Acetic acid	60	64-19-7	12.6	0
5	1	MMP	Outdoor storage	4	Acetic acid	60	64-19-7	12.6	0
6	1	MMP	Deep pit 2	4	Acetic acid	60	64-19-7	12.6	19057
7	1	Sulfdox	Deep pit 1	4	Acetic acid	60	64-19-7	12.6	28653
8	1	Sulfdox	Deep pit 2	4	Acetic acid	60	64-19-7	12.6	3256
9	1	Control	Deep pit 2	4	Acetic acid	60	64-19-7	12.6	0
10	1	Sulfdox	Outdoor storage	4	Acetic acid	60	64-19-7	12.6	0
11	1	Control	Deep pit 1	4	Acetic acid	60	64-19-7	12.6	9675
12	1	MMP	Deep pit 1	4	Acetic acid	60	64-19-7	12.6	36768
13	1	Control	Outdoor storage	4	Acetic acid	60	64-19-7	12.6	0
14	1	Triune	Outdoor storage	4	Acetic acid	60	64-19-7	12.6	0
15	1	Confine	Deep pit 1	4	Acetic acid	60	64-19-7	12.6	95395
1	1	Triune	Deep pit 1	5	Acetic acid	60	64-19-7	12.6	0
2	1	Confine	Outdoor storage	5	Acetic acid	60	64-19-7	12.6	0
3	1	Confine	Deep pit 2	5	Acetic acid	60	64-19-7	12.6	0
4	1	Triune	Deep pit 2	5	Acetic acid	60	64-19-7	12.6	0
5	1	MMP	Outdoor storage	5	Acetic acid	60	64-19-7	12.6	0
6	1	MMP	Deep pit 2	5	Acetic acid	60	64-19-7	12.6	1048
7	1	Sulfdox	Deep pit 1	5	Acetic acid	60	64-19-7	12.6	0
8	1	Sulfdox	Deep pit 2	5	Acetic acid	60	64-19-7	12.6	1654
9	1	Control	Deep pit 2	5	Acetic acid	60	64-19-7	12.6	18857
10	1	Sulfdox	Outdoor storage	5	Acetic acid	60	64-19-7	12.6	0
11	1	Control	Deep pit 1	5	Acetic acid	60	64-19-7	12.6	0
12	1	MMP	Deep pit 1	5	Acetic acid	60	64-19-7	12.6	0
13	1	Control	Outdoor storage	5	Acetic acid	60	64-19-7	12.6	0
14	1	Triune	Outdoor storage	5	Acetic acid	60	64-19-7	12.6	0
15	1	Confine	Deep pit 1	5	Acetic acid	60	64-19-7	12.6	0
1	1	Triune	Deep pit 1	6	Acetic acid	60	64-19-7	12.6	0
2	1	Confine	Outdoor storage	6	Acetic acid	60	64-19-7	12.6	4998
3	1	Confine	Deep pit 2	6	Acetic acid	60	64-19-7	12.6	0
4	1	Triune	Deep pit 2	6	Acetic acid	60	64-19-7	12.6	0
5	1	MMP	Outdoor storage	6	Acetic acid	60	64-19-7	12.6	4441
6	1	MMP	Deep pit 2	6	Acetic acid	60	64-19-7	12.6	0
7	1	Sulfdox	Deep pit 1	6	Acetic acid	60	64-19-7	12.6	0
8	1	Sulfdox	Deep pit 2	6	Acetic acid	60	64-19-7	12.6	6812
9	1	Control	Deep pit 2	6	Acetic acid	60	64-19-7	12.6	0
10	1	Sulfdox	Outdoor storage	6	Acetic acid	60	64-19-7	12.6	7522
11	1	Control	Deep pit 1	6	Acetic acid	60	64-19-7	12.6	0
12	1	MMP	Deep pit 1	6	Acetic acid	60	64-19-7	12.6	107361
13	1	Control	Outdoor storage	6	Acetic acid	60	64-19-7	12.6	82037
14	1	Triune	Outdoor storage	6	Acetic acid	60	64-19-7	12.6	3451
15	1	Confine	Deep pit 1	6	Acetic acid	60	64-19-7	12.6	12693
1	1	Triune	Deep pit 1	7	Acetic acid	60	64-19-7	12.6	0
2	1	Confine	Outdoor storage	7	Acetic acid	60	64-19-7	12.6	0
3	1	Confine	Deep pit 2	7	Acetic acid	60	64-19-7	12.6	0
4	1	Triune	Deep pit 2	7	Acetic acid	60	64-19-7	12.6	0
5	1	MMP	Outdoor storage	7	Acetic acid	60	64-19-7	12.6	92090
6	1	MMP	Deep pit 2	7	Acetic acid	60	64-19-7	12.6	134965
7	1	Sulfdox	Deep pit 1	7	Acetic acid	60	64-19-7	12.6	0
8	1	Sulfdox	Deep pit 2	7	Acetic acid	60	64-19-7	12.6	385279
9	1	Control	Deep pit 2	7	Acetic acid	60	64-19-7	12.6	140657
10	1	Sulfdox	Outdoor storage	7	Acetic acid	60	64-19-7	12.6	5399
11	1	Control	Deep pit 1	7	Acetic acid	60	64-19-7	12.6	0
12	1	MMP	Deep pit 1	7	Acetic acid	60	64-19-7	12.6	8704
13	1	Control	Outdoor storage	7	Acetic acid	60	64-19-7	12.6	0
14	1	Triune	Outdoor storage	7	Acetic acid	60	64-19-7	12.6	3207
15	1	Confine	Deep pit 1	7	Acetic acid	60	64-19-7	12.6	6467
1	1	Triune	Deep pit 1	8	Acetic acid	60	64-19-7	12.6	0
2	1	Confine	Outdoor storage	8	Acetic acid	60	64-19-7	12.6	2436
3	1	Confine	Deep pit 2	8	Acetic acid	60	64-19-7	12.6	0
4	1	Triune	Deep pit 2	8	Acetic acid	60	64-19-7	12.6	0
5	1	MMP	Outdoor storage	8	Acetic acid	60	64-19-7	12.6	0
6	1	MMP	Deep pit 2	8	Acetic acid	60	64-19-7	12.6	2855
7	1	Sulfdox	Deep pit 1	8	Acetic acid	60	64-19-7	12.6	0
8	1	Sulfdox	Deep pit 2	8	Acetic acid	60	64-19-7	12.6	17296
9	1	Control	Deep pit 2	8	Acetic acid	60	64-19-7	12.6	17068
10	1	Sulfdox	Outdoor storage	8	Acetic acid	60	64-19-7	12.6	15487
11	1	Control	Deep pit 1	8	Acetic acid	60	64-19-7	12.6	0
12	1	MMP	Deep pit 1	8	Acetic acid	60	64-19-7	12.6	14614
13	1	Control	Outdoor storage	8	Acetic acid	60	64-19-7	12.6	0
14	1	Triune	Outdoor storage	8	Acetic acid	60	64-19-7	12.6	2219
15	1	Confine	Deep pit 1	8	Acetic acid	60	64-19-7	12.6	13793
1	1	Triune	Deep pit 1	-1	Propionic acid	126	79-09-4	13.85	8251
2	1	Confine	Outdoor storage	-1	Propionic acid	126	79-09-4	13.85	0
3	1	Confine	Deep pit 2	-1	Propionic acid	126	79-09-4	13.85	0
4	1	Triune	Deep pit 2	-1	Propionic acid	126	79-09-4	13.85	21033
5	1	MMP	Outdoor storage	-1	Propionic acid	126	79-09-4	13.85	0
6	1	MMP	Deep pit 2	-1	Propionic acid	126	79-09-4	13.85	28568
7	1	Sulfdox	Deep pit 1	-1	Propionic acid	126	79-09-4	13.85	0
8	1	Sulfdox	Deep pit 2	-1	Propionic acid	126	79-09-4	13.85	126863
9	1	Control	Deep pit 2	-1	Propionic acid	126	79-09-4	13.85	0
10	1	Sulfdox	Outdoor storage	-1	Propionic acid	126	79-09-4	13.85	0
11	1	Control	Deep pit 1	-1	Propionic acid	126	79-09-4	13.85	0
12	1	MMP	Deep pit 1	-1	Propionic acid	126	79-09-4	13.85	0
13	1	Control	Outdoor storage	-1	Propionic acid	126	79-09-4	13.85	0
14	1	Triune	Outdoor storage	-1	Propionic acid	126	79-09-4	13.85	0
15	1	Confine	Deep pit 1	-1	Propionic acid	126	79-09-4	13.85	0
1	1	Triune	Deep pit 1	1	Propionic acid	126	79-09-4	13.85	0
2	1	Confine	Outdoor storage	1	Propionic acid	126	79-09-4	13.85	0
3	1	Confine	Deep pit 2	1	Propionic acid	126	79-09-4	13.85	5712
4	1	Triune	Deep pit 2	1	Propionic acid	126	79-09-4	13.85	65291
5	1	MMP	Outdoor storage	1	Propionic acid	126	79-09-4	13.85	0
6	1	MMP	Deep pit 2	1	Propionic acid	126	79-09-4	13.85	7303
7	1	Sulfdox	Deep pit 1	1	Propionic acid	126	79-09-4	13.85	1308
8	1	Sulfdox	Deep pit 2	1	Propionic acid	126	79-09-4	13.85	0
9	1	Control	Deep pit 2	1	Propionic acid	126	79-09-4	13.85	0
10	1	Sulfdox	Outdoor storage	1	Propionic acid	126	79-09-4	13.85	0
11	1	Control	Deep pit 1	1	Propionic acid	126	79-09-4	13.85	0
12	1	MMP	Deep pit 1	1	Propionic acid	126	79-09-4	13.85	0
13	1	Control	Outdoor storage	1	Propionic acid	126	79-09-4	13.85	0
14	1	Triune	Outdoor storage	1	Propionic acid	126	79-09-4	13.85	0
15	1	Confine	Deep pit 1	1	Propionic acid	126	79-09-4	13.85	0
1	1	Triune	Deep pit 1	2	Propionic acid	126	79-09-4	13.85	0
2	1	Confine	Outdoor storage	2	Propionic acid	126	79-09-4	13.85	0
3	1	Confine	Deep pit 2	2	Propionic acid	126	79-09-4	13.85	21656
4	1	Triune	Deep pit 2	2	Propionic acid	126	79-09-4	13.85	26934
5	1	MMP	Outdoor storage	2	Propionic acid	126	79-09-4	13.85	0
6	1	MMP	Deep pit 2	2	Propionic acid	126	79-09-4	13.85	12689
7	1	Sulfdox	Deep pit 1	2	Propionic acid	126	79-09-4	13.85	0
8	1	Sulfdox	Deep pit 2	2	Propionic acid	126	79-09-4	13.85	0
9	1	Control	Deep pit 2	2	Propionic acid	126	79-09-4	13.85	0
10	1	Sulfdox	Outdoor storage	2	Propionic acid	126	79-09-4	13.85	0
11	1	Control	Deep pit 1	2	Propionic acid	126	79-09-4	13.85	0
12	1	MMP	Deep pit 1	2	Propionic acid	126	79-09-4	13.85	0
13	1	Control	Outdoor storage	2	Propionic acid	126	79-09-4	13.85	0
14	1	Triune	Outdoor storage	2	Propionic acid	126	79-09-4	13.85	0
15	1	Confine	Deep pit 1	2	Propionic acid	126	79-09-4	13.85	0
1	1	Triune	Deep pit 1	3	Propionic acid	126	79-09-4	13.85	78933
2	1	Confine	Outdoor storage	3	Propionic acid	126	79-09-4	13.85	0
3	1	Confine	Deep pit 2	3	Propionic acid	126	79-09-4	13.85	21102
4	1	Triune	Deep pit 2	3	Propionic acid	126	79-09-4	13.85	0
5	1	MMP	Outdoor storage	3	Propionic acid	126	79-09-4	13.85	0
6	1	MMP	Deep pit 2	3	Propionic acid	126	79-09-4	13.85	7199
7	1	Sulfdox	Deep pit 1	3	Propionic acid	126	79-09-4	13.85	298687
8	1	Sulfdox	Deep pit 2	3	Propionic acid	126	79-09-4	13.85	9434
9	1	Control	Deep pit 2	3	Propionic acid	126	79-09-4	13.85	11428
10	1	Sulfdox	Outdoor storage	3	Propionic acid	126	79-09-4	13.85	0
11	1	Control	Deep pit 1	3	Propionic acid	126	79-09-4	13.85	109404
12	1	MMP	Deep pit 1	3	Propionic acid	126	79-09-4	13.85	221356
13	1	Control	Outdoor storage	3	Propionic acid	126	79-09-4	13.85	2776
14	1	Triune	Outdoor storage	3	Propionic acid	126	79-09-4	13.85	0
15	1	Confine	Deep pit 1	3	Propionic acid	126	79-09-4	13.85	224241
1	1	Triune	Deep pit 1	4	Propionic acid	126	79-09-4	13.85	0
2	1	Confine	Outdoor storage	4	Propionic acid	126	79-09-4	13.85	0
3	1	Confine	Deep pit 2	4	Propionic acid	126	79-09-4	13.85	4201
4	1	Triune	Deep pit 2	4	Propionic acid	126	79-09-4	13.85	0
5	1	MMP	Outdoor storage	4	Propionic acid	126	79-09-4	13.85	0
6	1	MMP	Deep pit 2	4	Propionic acid	126	79-09-4	13.85	4962
7	1	Sulfdox	Deep pit 1	4	Propionic acid	126	79-09-4	13.85	0
8	1	Sulfdox	Deep pit 2	4	Propionic acid	126	79-09-4	13.85	6295
9	1	Control	Deep pit 2	4	Propionic acid	126	79-09-4	13.85	0
10	1	Sulfdox	Outdoor storage	4	Propionic acid	126	79-09-4	13.85	0
11	1	Control	Deep pit 1	4	Propionic acid	126	79-09-4	13.85	0
12	1	MMP	Deep pit 1	4	Propionic acid	126	79-09-4	13.85	9681
13	1	Control	Outdoor storage	4	Propionic acid	126	79-09-4	13.85	13648
14	1	Triune	Outdoor storage	4	Propionic acid	126	79-09-4	13.85	4665
15	1	Confine	Deep pit 1	4	Propionic acid	126	79-09-4	13.85	18531
1	1	Triune	Deep pit 1	5	Propionic acid	126	79-09-4	13.85	1431
2	1	Confine	Outdoor storage	5	Propionic acid	126	79-09-4	13.85	3210
3	1	Confine	Deep pit 2	5	Propionic acid	126	79-09-4	13.85	0
4	1	Triune	Deep pit 2	5	Propionic acid	126	79-09-4	13.85	0
5	1	MMP	Outdoor storage	5	Propionic acid	126	79-09-4	13.85	10410
6	1	MMP	Deep pit 2	5	Propionic acid	126	79-09-4	13.85	0
7	1	Sulfdox	Deep pit 1	5	Propionic acid	126	79-09-4	13.85	0
8	1	Sulfdox	Deep pit 2	5	Propionic acid	126	79-09-4	13.85	0
9	1	Control	Deep pit 2	5	Propionic acid	126	79-09-4	13.85	0
10	1	Sulfdox	Outdoor storage	5	Propionic acid	126	79-09-4	13.85	0
11	1	Control	Deep pit 1	5	Propionic acid	126	79-09-4	13.85	2885
12	1	MMP	Deep pit 1	5	Propionic acid	126	79-09-4	13.85	3293
13	1	Control	Outdoor storage	5	Propionic acid	126	79-09-4	13.85	0
14	1	Triune	Outdoor storage	5	Propionic acid	126	79-09-4	13.85	0
15	1	Confine	Deep pit 1	5	Propionic acid	126	79-09-4	13.85	0
1	1	Triune	Deep pit 1	6	Propionic acid	126	79-09-4	13.85	0
2	1	Confine	Outdoor storage	6	Propionic acid	126	79-09-4	13.85	0
3	1	Confine	Deep pit 2	6	Propionic acid	126	79-09-4	13.85	2817
4	1	Triune	Deep pit 2	6	Propionic acid	126	79-09-4	13.85	0
5	1	MMP	Outdoor storage	6	Propionic acid	126	79-09-4	13.85	0
6	1	MMP	Deep pit 2	6	Propionic acid	126	79-09-4	13.85	0
7	1	Sulfdox	Deep pit 1	6	Propionic acid	126	79-09-4	13.85	0
8	1	Sulfdox	Deep pit 2	6	Propionic acid	126	79-09-4	13.85	0
9	1	Control	Deep pit 2	6	Propionic acid	126	79-09-4	13.85	0
10	1	Sulfdox	Outdoor storage	6	Propionic acid	126	79-09-4	13.85	0
11	1	Control	Deep pit 1	6	Propionic acid	126	79-09-4	13.85	0
12	1	MMP	Deep pit 1	6	Propionic acid	126	79-09-4	13.85	0
13	1	Control	Outdoor storage	6	Propionic acid	126	79-09-4	13.85	0
14	1	Triune	Outdoor storage	6	Propionic acid	126	79-09-4	13.85	0
15	1	Confine	Deep pit 1	6	Propionic acid	126	79-09-4	13.85	0
1	1	Triune	Deep pit 1	7	Propionic acid	126	79-09-4	13.85	0
2	1	Confine	Outdoor storage	7	Propionic acid	126	79-09-4	13.85	0
3	1	Confine	Deep pit 2	7	Propionic acid	126	79-09-4	13.85	0
4	1	Triune	Deep pit 2	7	Propionic acid	126	79-09-4	13.85	8026
5	1	MMP	Outdoor storage	7	Propionic acid	126	79-09-4	13.85	61671
6	1	MMP	Deep pit 2	7	Propionic acid	126	79-09-4	13.85	184379
7	1	Sulfdox	Deep pit 1	7	Propionic acid	126	79-09-4	13.85	0
8	1	Sulfdox	Deep pit 2	7	Propionic acid	126	79-09-4	13.85	459204
9	1	Control	Deep pit 2	7	Propionic acid	126	79-09-4	13.85	136645
10	1	Sulfdox	Outdoor storage	7	Propionic acid	126	79-09-4	13.85	0
11	1	Control	Deep pit 1	7	Propionic acid	126	79-09-4	13.85	3155
12	1	MMP	Deep pit 1	7	Propionic acid	126	79-09-4	13.85	0
13	1	Control	Outdoor storage	7	Propionic acid	126	79-09-4	13.85	0
14	1	Triune	Outdoor storage	7	Propionic acid	126	79-09-4	13.85	0
15	1	Confine	Deep pit 1	7	Propionic acid	126	79-09-4	13.85	2993
1	1	Triune	Deep pit 1	8	Propionic acid	126	79-09-4	13.85	1820
2	1	Confine	Outdoor storage	8	Propionic acid	126	79-09-4	13.85	0
3	1	Confine	Deep pit 2	8	Propionic acid	126	79-09-4	13.85	3091
4	1	Triune	Deep pit 2	8	Propionic acid	126	79-09-4	13.85	894
5	1	MMP	Outdoor storage	8	Propionic acid	126	79-09-4	13.85	0
6	1	MMP	Deep pit 2	8	Propionic acid	126	79-09-4	13.85	5459
7	1	Sulfdox	Deep pit 1	8	Propionic acid	126	79-09-4	13.85	2219
8	1	Sulfdox	Deep pit 2	8	Propionic acid	126	79-09-4	13.85	11275
9	1	Control	Deep pit 2	8	Propionic acid	126	79-09-4	13.85	5998
10	1	Sulfdox	Outdoor storage	8	Propionic acid	126	79-09-4	13.85	0
11	1	Control	Deep pit 1	8	Propionic acid	126	79-09-4	13.85	2299
12	1	MMP	Deep pit 1	8	Propionic acid	126	79-09-4	13.85	0
13	1	Control	Outdoor storage	8	Propionic acid	126	79-09-4	13.85	0
14	1	Triune	Outdoor storage	8	Propionic acid	126	79-09-4	13.85	0
15	1	Confine	Deep pit 1	8	Propionic acid	126	79-09-4	13.85	0
1	1	Triune	Deep pit 1	-1	Isobutyric acid	43	79-31-2	14.85	0
2	1	Confine	Outdoor storage	-1	Isobutyric acid	43	79-31-2	14.85	11161
3	1	Confine	Deep pit 2	-1	Isobutyric acid	43	79-31-2	14.85	11423
4	1	Triune	Deep pit 2	-1	Isobutyric acid	43	79-31-2	14.85	43652
5	1	MMP	Outdoor storage	-1	Isobutyric acid	43	79-31-2	14.85	0
6	1	MMP	Deep pit 2	-1	Isobutyric acid	43	79-31-2	14.85	23775
7	1	Sulfdox	Deep pit 1	-1	Isobutyric acid	43	79-31-2	14.85	0
8	1	Sulfdox	Deep pit 2	-1	Isobutyric acid	43	79-31-2	14.85	12578
9	1	Control	Deep pit 2	-1	Isobutyric acid	43	79-31-2	14.85	0
10	1	Sulfdox	Outdoor storage	-1	Isobutyric acid	43	79-31-2	14.85	0
11	1	Control	Deep pit 1	-1	Isobutyric acid	43	79-31-2	14.85	0
12	1	MMP	Deep pit 1	-1	Isobutyric acid	43	79-31-2	14.85	0
13	1	Control	Outdoor storage	-1	Isobutyric acid	43	79-31-2	14.85	0
14	1	Triune	Outdoor storage	-1	Isobutyric acid	43	79-31-2	14.85	0
15	1	Confine	Deep pit 1	-1	Isobutyric acid	43	79-31-2	14.85	0
1	1	Triune	Deep pit 1	1	Isobutyric acid	43	79-31-2	14.85	22946
2	1	Confine	Outdoor storage	1	Isobutyric acid	43	79-31-2	14.85	2477
3	1	Confine	Deep pit 2	1	Isobutyric acid	43	79-31-2	14.85	7814
4	1	Triune	Deep pit 2	1	Isobutyric acid	43	79-31-2	14.85	48378
5	1	MMP	Outdoor storage	1	Isobutyric acid	43	79-31-2	14.85	2552
6	1	MMP	Deep pit 2	1	Isobutyric acid	43	79-31-2	14.85	6373
7	1	Sulfdox	Deep pit 1	1	Isobutyric acid	43	79-31-2	14.85	11221
8	1	Sulfdox	Deep pit 2	1	Isobutyric acid	43	79-31-2	14.85	9560
9	1	Control	Deep pit 2	1	Isobutyric acid	43	79-31-2	14.85	2692
10	1	Sulfdox	Outdoor storage	1	Isobutyric acid	43	79-31-2	14.85	4639
11	1	Control	Deep pit 1	1	Isobutyric acid	43	79-31-2	14.85	7702
12	1	MMP	Deep pit 1	1	Isobutyric acid	43	79-31-2	14.85	4881
13	1	Control	Outdoor storage	1	Isobutyric acid	43	79-31-2	14.85	17634
14	1	Triune	Outdoor storage	1	Isobutyric acid	43	79-31-2	14.85	0
15	1	Confine	Deep pit 1	1	Isobutyric acid	43	79-31-2	14.85	4785
1	1	Triune	Deep pit 1	2	Isobutyric acid	43	79-31-2	14.85	4425
2	1	Confine	Outdoor storage	2	Isobutyric acid	43	79-31-2	14.85	1575
3	1	Confine	Deep pit 2	2	Isobutyric acid	43	79-31-2	14.85	15638
4	1	Triune	Deep pit 2	2	Isobutyric acid	43	79-31-2	14.85	15106
5	1	MMP	Outdoor storage	2	Isobutyric acid	43	79-31-2	14.85	910.3
6	1	MMP	Deep pit 2	2	Isobutyric acid	43	79-31-2	14.85	11215
7	1	Sulfdox	Deep pit 1	2	Isobutyric acid	43	79-31-2	14.85	2260
8	1	Sulfdox	Deep pit 2	2	Isobutyric acid	43	79-31-2	14.85	0
9	1	Control	Deep pit 2	2	Isobutyric acid	43	79-31-2	14.85	1756
10	1	Sulfdox	Outdoor storage	2	Isobutyric acid	43	79-31-2	14.85	3376
11	1	Control	Deep pit 1	2	Isobutyric acid	43	79-31-2	14.85	2149
12	1	MMP	Deep pit 1	2	Isobutyric acid	43	79-31-2	14.85	5511
13	1	Control	Outdoor storage	2	Isobutyric acid	43	79-31-2	14.85	2874
14	1	Triune	Outdoor storage	2	Isobutyric acid	43	79-31-2	14.85	2855
15	1	Confine	Deep pit 1	2	Isobutyric acid	43	79-31-2	14.85	4682
1	1	Triune	Deep pit 1	3	Isobutyric acid	43	79-31-2	14.85	177196
2	1	Confine	Outdoor storage	3	Isobutyric acid	43	79-31-2	14.85	0
3	1	Confine	Deep pit 2	3	Isobutyric acid	43	79-31-2	14.85	44386
4	1	Triune	Deep pit 2	3	Isobutyric acid	43	79-31-2	14.85	2712
5	1	MMP	Outdoor storage	3	Isobutyric acid	43	79-31-2	14.85	1029
6	1	MMP	Deep pit 2	3	Isobutyric acid	43	79-31-2	14.85	21332
7	1	Sulfdox	Deep pit 1	3	Isobutyric acid	43	79-31-2	14.85	644303
8	1	Sulfdox	Deep pit 2	3	Isobutyric acid	43	79-31-2	14.85	22465
9	1	Control	Deep pit 2	3	Isobutyric acid	43	79-31-2	14.85	33021
10	1	Sulfdox	Outdoor storage	3	Isobutyric acid	43	79-31-2	14.85	4016
11	1	Control	Deep pit 1	3	Isobutyric acid	43	79-31-2	14.85	500572
12	1	MMP	Deep pit 1	3	Isobutyric acid	43	79-31-2	14.85	772651
13	1	Control	Outdoor storage	3	Isobutyric acid	43	79-31-2	14.85	9098
14	1	Triune	Outdoor storage	3	Isobutyric acid	43	79-31-2	14.85	17733
15	1	Confine	Deep pit 1	3	Isobutyric acid	43	79-31-2	14.85	599782
1	1	Triune	Deep pit 1	4	Isobutyric acid	43	79-31-2	14.85	4049
2	1	Confine	Outdoor storage	4	Isobutyric acid	43	79-31-2	14.85	0
3	1	Confine	Deep pit 2	4	Isobutyric acid	43	79-31-2	14.85	6403
4	1	Triune	Deep pit 2	4	Isobutyric acid	43	79-31-2	14.85	2269
5	1	MMP	Outdoor storage	4	Isobutyric acid	43	79-31-2	14.85	611.2
6	1	MMP	Deep pit 2	4	Isobutyric acid	43	79-31-2	14.85	9356
7	1	Sulfdox	Deep pit 1	4	Isobutyric acid	43	79-31-2	14.85	18220
8	1	Sulfdox	Deep pit 2	4	Isobutyric acid	43	79-31-2	14.85	16460
9	1	Control	Deep pit 2	4	Isobutyric acid	43	79-31-2	14.85	3563
10	1	Sulfdox	Outdoor storage	4	Isobutyric acid	43	79-31-2	14.85	4949
11	1	Control	Deep pit 1	4	Isobutyric acid	43	79-31-2	14.85	11636
12	1	MMP	Deep pit 1	4	Isobutyric acid	43	79-31-2	14.85	17076
13	1	Control	Outdoor storage	4	Isobutyric acid	43	79-31-2	14.85	25993
14	1	Triune	Outdoor storage	4	Isobutyric acid	43	79-31-2	14.85	12181
15	1	Confine	Deep pit 1	4	Isobutyric acid	43	79-31-2	14.85	29759
1	1	Triune	Deep pit 1	5	Isobutyric acid	43	79-31-2	14.85	2763
2	1	Confine	Outdoor storage	5	Isobutyric acid	43	79-31-2	14.85	0
3	1	Confine	Deep pit 2	5	Isobutyric acid	43	79-31-2	14.85	0
4	1	Triune	Deep pit 2	5	Isobutyric acid	43	79-31-2	14.85	532
5	1	MMP	Outdoor storage	5	Isobutyric acid	43	79-31-2	14.85	31871
6	1	MMP	Deep pit 2	5	Isobutyric acid	43	79-31-2	14.85	4034
7	1	Sulfdox	Deep pit 1	5	Isobutyric acid	43	79-31-2	14.85	0
8	1	Sulfdox	Deep pit 2	5	Isobutyric acid	43	79-31-2	14.85	5537
9	1	Control	Deep pit 2	5	Isobutyric acid	43	79-31-2	14.85	10642
10	1	Sulfdox	Outdoor storage	5	Isobutyric acid	43	79-31-2	14.85	43789
11	1	Control	Deep pit 1	5	Isobutyric acid	43	79-31-2	14.85	3815
12	1	MMP	Deep pit 1	5	Isobutyric acid	43	79-31-2	14.85	9299
13	1	Control	Outdoor storage	5	Isobutyric acid	43	79-31-2	14.85	6404
14	1	Triune	Outdoor storage	5	Isobutyric acid	43	79-31-2	14.85	11064
15	1	Confine	Deep pit 1	5	Isobutyric acid	43	79-31-2	14.85	16164
1	1	Triune	Deep pit 1	6	Isobutyric acid	43	79-31-2	14.85	2900
2	1	Confine	Outdoor storage	6	Isobutyric acid	43	79-31-2	14.85	4251
3	1	Confine	Deep pit 2	6	Isobutyric acid	43	79-31-2	14.85	0
4	1	Triune	Deep pit 2	6	Isobutyric acid	43	79-31-2	14.85	0
5	1	MMP	Outdoor storage	6	Isobutyric acid	43	79-31-2	14.85	0
6	1	MMP	Deep pit 2	6	Isobutyric acid	43	79-31-2	14.85	0
7	1	Sulfdox	Deep pit 1	6	Isobutyric acid	43	79-31-2	14.85	3032
8	1	Sulfdox	Deep pit 2	6	Isobutyric acid	43	79-31-2	14.85	20135
9	1	Control	Deep pit 2	6	Isobutyric acid	43	79-31-2	14.85	15779
10	1	Sulfdox	Outdoor storage	6	Isobutyric acid	43	79-31-2	14.85	4464
11	1	Control	Deep pit 1	6	Isobutyric acid	43	79-31-2	14.85	3220
12	1	MMP	Deep pit 1	6	Isobutyric acid	43	79-31-2	14.85	6678
13	1	Control	Outdoor storage	6	Isobutyric acid	43	79-31-2	14.85	19471
14	1	Triune	Outdoor storage	6	Isobutyric acid	43	79-31-2	14.85	8191
15	1	Confine	Deep pit 1	6	Isobutyric acid	43	79-31-2	14.85	5468
1	1	Triune	Deep pit 1	7	Isobutyric acid	43	79-31-2	14.85	3293
2	1	Confine	Outdoor storage	7	Isobutyric acid	43	79-31-2	14.85	0
3	1	Confine	Deep pit 2	7	Isobutyric acid	43	79-31-2	14.85	0
4	1	Triune	Deep pit 2	7	Isobutyric acid	43	79-31-2	14.85	8471
5	1	MMP	Outdoor storage	7	Isobutyric acid	43	79-31-2	14.85	0
6	1	MMP	Deep pit 2	7	Isobutyric acid	43	79-31-2	14.85	125644
7	1	Sulfdox	Deep pit 1	7	Isobutyric acid	43	79-31-2	14.85	6798
8	1	Sulfdox	Deep pit 2	7	Isobutyric acid	43	79-31-2	14.85	252835
9	1	Control	Deep pit 2	7	Isobutyric acid	43	79-31-2	14.85	173395
10	1	Sulfdox	Outdoor storage	7	Isobutyric acid	43	79-31-2	14.85	3126
11	1	Control	Deep pit 1	7	Isobutyric acid	43	79-31-2	14.85	1479
12	1	MMP	Deep pit 1	7	Isobutyric acid	43	79-31-2	14.85	3975
13	1	Control	Outdoor storage	7	Isobutyric acid	43	79-31-2	14.85	6054
14	1	Triune	Outdoor storage	7	Isobutyric acid	43	79-31-2	14.85	5530
15	1	Confine	Deep pit 1	7	Isobutyric acid	43	79-31-2	14.85	9061
1	1	Triune	Deep pit 1	8	Isobutyric acid	43	79-31-2	14.85	7441
2	1	Confine	Outdoor storage	8	Isobutyric acid	43	79-31-2	14.85	0
3	1	Confine	Deep pit 2	8	Isobutyric acid	43	79-31-2	14.85	1900
4	1	Triune	Deep pit 2	8	Isobutyric acid	43	79-31-2	14.85	0
5	1	MMP	Outdoor storage	8	Isobutyric acid	43	79-31-2	14.85	0
6	1	MMP	Deep pit 2	8	Isobutyric acid	43	79-31-2	14.85	4704
7	1	Sulfdox	Deep pit 1	8	Isobutyric acid	43	79-31-2	14.85	1315
8	1	Sulfdox	Deep pit 2	8	Isobutyric acid	43	79-31-2	14.85	6551
9	1	Control	Deep pit 2	8	Isobutyric acid	43	79-31-2	14.85	3371
10	1	Sulfdox	Outdoor storage	8	Isobutyric acid	43	79-31-2	14.85	2668
11	1	Control	Deep pit 1	8	Isobutyric acid	43	79-31-2	14.85	1624
12	1	MMP	Deep pit 1	8	Isobutyric acid	43	79-31-2	14.85	1910
13	1	Control	Outdoor storage	8	Isobutyric acid	43	79-31-2	14.85	2241
14	1	Triune	Outdoor storage	8	Isobutyric acid	43	79-31-2	14.85	0
15	1	Confine	Deep pit 1	8	Isobutyric acid	43	79-31-2	14.85	3246
1	2	Control	Deep pit 1	-1	Skatole	130	83-34-1	29.16	9396
2	2	Control	Deep pit 2	-1	Skatole	130	83-34-1	29.16	44440
3	2	WW	Deep pit 3	-1	Skatole	130	83-34-1	29.16	12666
4	2	MTM	Deep pit 1	-1	Skatole	130	83-34-1	29.16	19302
5	2	Enviro	Deep pit 1	-1	Skatole	130	83-34-1	29.16	19205
6	2	MTM	Deep pit 2	-1	Skatole	130	83-34-1	29.16	96087
7	2	Oxydol	Deep pit 2	-1	Skatole	130	83-34-1	29.16	288814
8	2	Oxydol	Deep pit 3	-1	Skatole	130	83-34-1	29.16	5295
9	2	MTM	Deep pit 3	-1	Skatole	130	83-34-1	29.16	3765
10	2	WW	Deep pit 1	-1	Skatole	130	83-34-1	29.16	28733
11	2	Control	Deep pit 3	-1	Skatole	130	83-34-1	29.16	6467
12	2	Enviro	Deep pit 3	-1	Skatole	130	83-34-1	29.16	8327
13	2	Oxydol	Deep pit 1	-1	Skatole	130	83-34-1	29.16	15271
14	2	Enviro	Deep pit 2	-1	Skatole	130	83-34-1	29.16	71476
15	2	WW	Deep pit 2	-1	Skatole	130	83-34-1	29.16	189008
1	2	Control	Deep pit 1	1	Skatole	130	83-34-1	29.16	32054
2	2	Control	Deep pit 2	1	Skatole	130	83-34-1	29.16	206396
3	2	WW	Deep pit 3	1	Skatole	130	83-34-1	29.16	27742
4	2	MTM	Deep pit 1	1	Skatole	130	83-34-1	29.16	32574
5	2	Enviro	Deep pit 1	1	Skatole	130	83-34-1	29.16	59967
6	2	MTM	Deep pit 2	1	Skatole	130	83-34-1	29.16	186883
7	2	Oxydol	Deep pit 2	1	Skatole	130	83-34-1	29.16	474027
8	2	Oxydol	Deep pit 3	1	Skatole	130	83-34-1	29.16	8019
9	2	MTM	Deep pit 3	1	Skatole	130	83-34-1	29.16	7202
10	2	WW	Deep pit 1	1	Skatole	130	83-34-1	29.16	48942
11	2	Control	Deep pit 3	1	Skatole	130	83-34-1	29.16	16968
12	2	Enviro	Deep pit 3	1	Skatole	130	83-34-1	29.16	13226
13	2	Oxydol	Deep pit 1	1	Skatole	130	83-34-1	29.16	171260
14	2	Enviro	Deep pit 2	1	Skatole	130	83-34-1	29.16	391991
15	2	WW	Deep pit 2	1	Skatole	130	83-34-1	29.16	328286
1	2	Control	Deep pit 1	2	Skatole	130	83-34-1	29.16	71442
2	2	Control	Deep pit 2	2	Skatole	130	83-34-1	29.16	276040
3	2	WW	Deep pit 3	2	Skatole	130	83-34-1	29.16	80707
4	2	MTM	Deep pit 1	2	Skatole	130	83-34-1	29.16	29581
5	2	Enviro	Deep pit 1	2	Skatole	130	83-34-1	29.16	25783
6	2	MTM	Deep pit 2	2	Skatole	130	83-34-1	29.16	310977
7	2	Oxydol	Deep pit 2	2	Skatole	130	83-34-1	29.16	674585
8	2	Oxydol	Deep pit 3	2	Skatole	130	83-34-1	29.16	36388
9	2	MTM	Deep pit 3	2	Skatole	130	83-34-1	29.16	42892
10	2	WW	Deep pit 1	2	Skatole	130	83-34-1	29.16	64612
11	2	Control	Deep pit 3	2	Skatole	130	83-34-1	29.16	26983
12	2	Enviro	Deep pit 3	2	Skatole	130	83-34-1	29.16	40347
13	2	Oxydol	Deep pit 1	2	Skatole	130	83-34-1	29.16	167056
14	2	Enviro	Deep pit 2	2	Skatole	130	83-34-1	29.16	373300
15	2	WW	Deep pit 2	2	Skatole	130	83-34-1	29.16	237715
1	2	Control	Deep pit 1	3	Skatole	130	83-34-1	29.16	301036
2	2	Control	Deep pit 2	3	Skatole	130	83-34-1	29.16	336182
3	2	WW	Deep pit 3	3	Skatole	130	83-34-1	29.16	207568
4	2	MTM	Deep pit 1	3	Skatole	130	83-34-1	29.16	162312
5	2	Enviro	Deep pit 1	3	Skatole	130	83-34-1	29.16	194956
6	2	MTM	Deep pit 2	3	Skatole	130	83-34-1	29.16	655656
7	2	Oxydol	Deep pit 2	3	Skatole	130	83-34-1	29.16	722668
8	2	Oxydol	Deep pit 3	3	Skatole	130	83-34-1	29.16	122103
9	2	MTM	Deep pit 3	3	Skatole	130	83-34-1	29.16	136106
10	2	WW	Deep pit 1	3	Skatole	130	83-34-1	29.16	209854
11	2	Control	Deep pit 3	3	Skatole	130	83-34-1	29.16	165088
12	2	Enviro	Deep pit 3	3	Skatole	130	83-34-1	29.16	155715
13	2	Oxydol	Deep pit 1	3	Skatole	130	83-34-1	29.16	442003
14	2	Enviro	Deep pit 2	3	Skatole	130	83-34-1	29.16	732271
15	2	WW	Deep pit 2	3	Skatole	130	83-34-1	29.16	764463
1	2	Control	Deep pit 1	4	Skatole	130	83-34-1	29.16	237952
2	2	Control	Deep pit 2	4	Skatole	130	83-34-1	29.16	574056
3	2	WW	Deep pit 3	4	Skatole	130	83-34-1	29.16	101802
4	2	MTM	Deep pit 1	4	Skatole	130	83-34-1	29.16	273289
5	2	Enviro	Deep pit 1	4	Skatole	130	83-34-1	29.16	253964
6	2	MTM	Deep pit 2	4	Skatole	130	83-34-1	29.16	762172
7	2	Oxydol	Deep pit 2	4	Skatole	130	83-34-1	29.16	1687883
8	2	Oxydol	Deep pit 3	4	Skatole	130	83-34-1	29.16	134787
9	2	MTM	Deep pit 3	4	Skatole	130	83-34-1	29.16	128750
10	2	WW	Deep pit 1	4	Skatole	130	83-34-1	29.16	228826
11	2	Control	Deep pit 3	4	Skatole	130	83-34-1	29.16	173470
12	2	Enviro	Deep pit 3	4	Skatole	130	83-34-1	29.16	166953
13	2	Oxydol	Deep pit 1	4	Skatole	130	83-34-1	29.16	378327
14	2	Enviro	Deep pit 2	4	Skatole	130	83-34-1	29.16	1300205
15	2	WW	Deep pit 2	4	Skatole	130	83-34-1	29.16	828095
1	2	Control	Deep pit 1	5	Skatole	130	83-34-1	29.16	313078
2	2	Control	Deep pit 2	5	Skatole	130	83-34-1	29.16	769391
3	2	WW	Deep pit 3	5	Skatole	130	83-34-1	29.16	129629
4	2	MTM	Deep pit 1	5	Skatole	130	83-34-1	29.16	40076
5	2	Enviro	Deep pit 1	5	Skatole	130	83-34-1	29.16	541968
6	2	MTM	Deep pit 2	5	Skatole	130	83-34-1	29.16	998965
7	2	Oxydol	Deep pit 2	5	Skatole	130	83-34-1	29.16	746030
8	2	Oxydol	Deep pit 3	5	Skatole	130	83-34-1	29.16	166385
9	2	MTM	Deep pit 3	5	Skatole	130	83-34-1	29.16	192755
10	2	WW	Deep pit 1	5	Skatole	130	83-34-1	29.16	493640
11	2	Control	Deep pit 3	5	Skatole	130	83-34-1	29.16	189301
12	2	Enviro	Deep pit 3	5	Skatole	130	83-34-1	29.16	224346
13	2	Oxydol	Deep pit 1	5	Skatole	130	83-34-1	29.16	533290
14	2	Enviro	Deep pit 2	5	Skatole	130	83-34-1	29.16	852391
15	2	WW	Deep pit 2	5	Skatole	130	83-34-1	29.16	704831
1	2	Control	Deep pit 1	6	Skatole	130	83-34-1	29.16	198799
2	2	Control	Deep pit 2	6	Skatole	130	83-34-1	29.16	291856
3	2	WW	Deep pit 3	6	Skatole	130	83-34-1	29.16	126225
4	2	MTM	Deep pit 1	6	Skatole	130	83-34-1	29.16	165228
5	2	Enviro	Deep pit 1	6	Skatole	130	83-34-1	29.16	261102
6	2	MTM	Deep pit 2	6	Skatole	130	83-34-1	29.16	332514
7	2	Oxydol	Deep pit 2	6	Skatole	130	83-34-1	29.16	404083
8	2	Oxydol	Deep pit 3	6	Skatole	130	83-34-1	29.16	245149
9	2	MTM	Deep pit 3	6	Skatole	130	83-34-1	29.16	188733
10	2	WW	Deep pit 1	6	Skatole	130	83-34-1	29.16	211626
11	2	Control	Deep pit 3	6	Skatole	130	83-34-1	29.16	145137
12	2	Enviro	Deep pit 3	6	Skatole	130	83-34-1	29.16	202188
13	2	Oxydol	Deep pit 1	6	Skatole	130	83-34-1	29.16	248494
14	2	Enviro	Deep pit 2	6	Skatole	130	83-34-1	29.16	234827
15	2	WW	Deep pit 2	6	Skatole	130	83-34-1	29.16	343341
1	2	Control	Deep pit 1	7	Skatole	130	83-34-1	29.16	386786
2	2	Control	Deep pit 2	7	Skatole	130	83-34-1	29.16	768398
3	2	WW	Deep pit 3	7	Skatole	130	83-34-1	29.16	179164
4	2	MTM	Deep pit 1	7	Skatole	130	83-34-1	29.16	576302
5	2	Enviro	Deep pit 1	7	Skatole	130	83-34-1	29.16	672351
6	2	MTM	Deep pit 2	7	Skatole	130	83-34-1	29.16	1039476
7	2	Oxydol	Deep pit 2	7	Skatole	130	83-34-1	29.16	806976
8	2	Oxydol	Deep pit 3	7	Skatole	130	83-34-1	29.16	347036
9	2	MTM	Deep pit 3	7	Skatole	130	83-34-1	29.16	698788
10	2	WW	Deep pit 1	7	Skatole	130	83-34-1	29.16	693559
11	2	Control	Deep pit 3	7	Skatole	130	83-34-1	29.16	306405
12	2	Enviro	Deep pit 3	7	Skatole	130	83-34-1	29.16	352395
13	2	Oxydol	Deep pit 1	7	Skatole	130	83-34-1	29.16	572002
14	2	Enviro	Deep pit 2	7	Skatole	130	83-34-1	29.16	1173129
15	2	WW	Deep pit 2	7	Skatole	130	83-34-1	29.16	764734
1	2	Control	Deep pit 1	8	Skatole	130	83-34-1	29.16	744773
2	2	Control	Deep pit 2	8	Skatole	130	83-34-1	29.16	1554102
3	2	WW	Deep pit 3	8	Skatole	130	83-34-1	29.16	790526
4	2	MTM	Deep pit 1	8	Skatole	130	83-34-1	29.16	248408
5	2	Enviro	Deep pit 1	8	Skatole	130	83-34-1	29.16	955148
6	2	MTM	Deep pit 2	8	Skatole	130	83-34-1	29.16	1118540
7	2	Oxydol	Deep pit 2	8	Skatole	130	83-34-1	29.16	1475402
8	2	Oxydol	Deep pit 3	8	Skatole	130	83-34-1	29.16	378227
9	2	MTM	Deep pit 3	8	Skatole	130	83-34-1	29.16	493507
10	2	WW	Deep pit 1	8	Skatole	130	83-34-1	29.16	1620919
11	2	Control	Deep pit 3	8	Skatole	130	83-34-1	29.16	357953
12	2	Enviro	Deep pit 3	8	Skatole	130	83-34-1	29.16	331428
13	2	Oxydol	Deep pit 1	8	Skatole	130	83-34-1	29.16	1359316
14	2	Enviro	Deep pit 2	8	Skatole	130	83-34-1	29.16	1215602
15	2	WW	Deep pit 2	8	Skatole	130	83-34-1	29.16	2265588
1	2	Control	Deep pit 1	-1	Indole	117	120-72-9	28.37	0
2	2	Control	Deep pit 2	-1	Indole	117	120-72-9	28.37	2094
3	2	WW	Deep pit 3	-1	Indole	117	120-72-9	28.37	0
4	2	MTM	Deep pit 1	-1	Indole	117	120-72-9	28.37	0
5	2	Enviro	Deep pit 1	-1	Indole	117	120-72-9	28.37	0
6	2	MTM	Deep pit 2	-1	Indole	117	120-72-9	28.37	4889
7	2	Oxydol	Deep pit 2	-1	Indole	117	120-72-9	28.37	13571
8	2	Oxydol	Deep pit 3	-1	Indole	117	120-72-9	28.37	0
9	2	MTM	Deep pit 3	-1	Indole	117	120-72-9	28.37	0
10	2	WW	Deep pit 1	-1	Indole	117	120-72-9	28.37	0
11	2	Control	Deep pit 3	-1	Indole	117	120-72-9	28.37	0
12	2	Enviro	Deep pit 3	-1	Indole	117	120-72-9	28.37	0
13	2	Oxydol	Deep pit 1	-1	Indole	117	120-72-9	28.37	0
14	2	Enviro	Deep pit 2	-1	Indole	117	120-72-9	28.37	0
15	2	WW	Deep pit 2	-1	Indole	117	120-72-9	28.37	16373
1	2	Control	Deep pit 1	1	Indole	117	120-72-9	28.37	0
2	2	Control	Deep pit 2	1	Indole	117	120-72-9	28.37	11900
3	2	WW	Deep pit 3	1	Indole	117	120-72-9	28.37	0
4	2	MTM	Deep pit 1	1	Indole	117	120-72-9	28.37	0
5	2	Enviro	Deep pit 1	1	Indole	117	120-72-9	28.37	0
6	2	MTM	Deep pit 2	1	Indole	117	120-72-9	28.37	5819
7	2	Oxydol	Deep pit 2	1	Indole	117	120-72-9	28.37	12504
8	2	Oxydol	Deep pit 3	1	Indole	117	120-72-9	28.37	0
9	2	MTM	Deep pit 3	1	Indole	117	120-72-9	28.37	0
10	2	WW	Deep pit 1	1	Indole	117	120-72-9	28.37	0
11	2	Control	Deep pit 3	1	Indole	117	120-72-9	28.37	0
12	2	Enviro	Deep pit 3	1	Indole	117	120-72-9	28.37	0
13	2	Oxydol	Deep pit 1	1	Indole	117	120-72-9	28.37	2766
14	2	Enviro	Deep pit 2	1	Indole	117	120-72-9	28.37	8843
15	2	WW	Deep pit 2	1	Indole	117	120-72-9	28.37	2501
1	2	Control	Deep pit 1	2	Indole	117	120-72-9	28.37	8318
2	2	Control	Deep pit 2	2	Indole	117	120-72-9	28.37	32297
3	2	WW	Deep pit 3	2	Indole	117	120-72-9	28.37	5954
4	2	MTM	Deep pit 1	2	Indole	117	120-72-9	28.37	2419
5	2	Enviro	Deep pit 1	2	Indole	117	120-72-9	28.37	0
6	2	MTM	Deep pit 2	2	Indole	117	120-72-9	28.37	10671
7	2	Oxydol	Deep pit 2	2	Indole	117	120-72-9	28.37	16183
8	2	Oxydol	Deep pit 3	2	Indole	117	120-72-9	28.37	1525
9	2	MTM	Deep pit 3	2	Indole	117	120-72-9	28.37	1333
10	2	WW	Deep pit 1	2	Indole	117	120-72-9	28.37	2714
11	2	Control	Deep pit 3	2	Indole	117	120-72-9	28.37	1654
12	2	Enviro	Deep pit 3	2	Indole	117	120-72-9	28.37	0
13	2	Oxydol	Deep pit 1	2	Indole	117	120-72-9	28.37	7958
14	2	Enviro	Deep pit 2	2	Indole	117	120-72-9	28.37	12914
15	2	WW	Deep pit 2	2	Indole	117	120-72-9	28.37	1960
1	2	Control	Deep pit 1	3	Indole	117	120-72-9	28.37	48566
2	2	Control	Deep pit 2	3	Indole	117	120-72-9	28.37	0
3	2	WW	Deep pit 3	3	Indole	117	120-72-9	28.37	19294
4	2	MTM	Deep pit 1	3	Indole	117	120-72-9	28.37	32883
5	2	Enviro	Deep pit 1	3	Indole	117	120-72-9	28.37	10699
6	2	MTM	Deep pit 2	3	Indole	117	120-72-9	28.37	47540
7	2	Oxydol	Deep pit 2	3	Indole	117	120-72-9	28.37	41350
8	2	Oxydol	Deep pit 3	3	Indole	117	120-72-9	28.37	17414
9	2	MTM	Deep pit 3	3	Indole	117	120-72-9	28.37	24684
10	2	WW	Deep pit 1	3	Indole	117	120-72-9	28.37	24658
11	2	Control	Deep pit 3	3	Indole	117	120-72-9	28.37	26607
12	2	Enviro	Deep pit 3	3	Indole	117	120-72-9	28.37	26139
13	2	Oxydol	Deep pit 1	3	Indole	117	120-72-9	28.37	9523
14	2	Enviro	Deep pit 2	3	Indole	117	120-72-9	28.37	55888
15	2	WW	Deep pit 2	3	Indole	117	120-72-9	28.37	29577
1	2	Control	Deep pit 1	4	Indole	117	120-72-9	28.37	19024
2	2	Control	Deep pit 2	4	Indole	117	120-72-9	28.37	15527
3	2	WW	Deep pit 3	4	Indole	117	120-72-9	28.37	4600
4	2	MTM	Deep pit 1	4	Indole	117	120-72-9	28.37	34476
5	2	Enviro	Deep pit 1	4	Indole	117	120-72-9	28.37	23622
6	2	MTM	Deep pit 2	4	Indole	117	120-72-9	28.37	19564
7	2	Oxydol	Deep pit 2	4	Indole	117	120-72-9	28.37	41836
8	2	Oxydol	Deep pit 3	4	Indole	117	120-72-9	28.37	9723
9	2	MTM	Deep pit 3	4	Indole	117	120-72-9	28.37	10071
10	2	WW	Deep pit 1	4	Indole	117	120-72-9	28.37	19358
11	2	Control	Deep pit 3	4	Indole	117	120-72-9	28.37	20926
12	2	Enviro	Deep pit 3	4	Indole	117	120-72-9	28.37	17664
13	2	Oxydol	Deep pit 1	4	Indole	117	120-72-9	28.37	13800
14	2	Enviro	Deep pit 2	4	Indole	117	120-72-9	28.37	18126
15	2	WW	Deep pit 2	4	Indole	117	120-72-9	28.37	17699
1	2	Control	Deep pit 1	5	Indole	117	120-72-9	28.37	9263
2	2	Control	Deep pit 2	5	Indole	117	120-72-9	28.37	36575
3	2	WW	Deep pit 3	5	Indole	117	120-72-9	28.37	3542
4	2	MTM	Deep pit 1	5	Indole	117	120-72-9	28.37	11272
5	2	Enviro	Deep pit 1	5	Indole	117	120-72-9	28.37	18515
6	2	MTM	Deep pit 2	5	Indole	117	120-72-9	28.37	69796
7	2	Oxydol	Deep pit 2	5	Indole	117	120-72-9	28.37	39413
8	2	Oxydol	Deep pit 3	5	Indole	117	120-72-9	28.37	4058
9	2	MTM	Deep pit 3	5	Indole	117	120-72-9	28.37	5947
10	2	WW	Deep pit 1	5	Indole	117	120-72-9	28.37	17528
11	2	Control	Deep pit 3	5	Indole	117	120-72-9	28.37	6140
12	2	Enviro	Deep pit 3	5	Indole	117	120-72-9	28.37	8042
13	2	Oxydol	Deep pit 1	5	Indole	117	120-72-9	28.37	7953
14	2	Enviro	Deep pit 2	5	Indole	117	120-72-9	28.37	45874
15	2	WW	Deep pit 2	5	Indole	117	120-72-9	28.37	13369
1	2	Control	Deep pit 1	6	Indole	117	120-72-9	28.37	6387
2	2	Control	Deep pit 2	6	Indole	117	120-72-9	28.37	3773
3	2	WW	Deep pit 3	6	Indole	117	120-72-9	28.37	2819
4	2	MTM	Deep pit 1	6	Indole	117	120-72-9	28.37	8846
5	2	Enviro	Deep pit 1	6	Indole	117	120-72-9	28.37	8432
6	2	MTM	Deep pit 2	6	Indole	117	120-72-9	28.37	9885
7	2	Oxydol	Deep pit 2	6	Indole	117	120-72-9	28.37	8631
8	2	Oxydol	Deep pit 3	6	Indole	117	120-72-9	28.37	4307
9	2	MTM	Deep pit 3	6	Indole	117	120-72-9	28.37	3948
10	2	WW	Deep pit 1	6	Indole	117	120-72-9	28.37	8417
11	2	Control	Deep pit 3	6	Indole	117	120-72-9	28.37	3182
12	2	Enviro	Deep pit 3	6	Indole	117	120-72-9	28.37	4631
13	2	Oxydol	Deep pit 1	6	Indole	117	120-72-9	28.37	6349
14	2	Enviro	Deep pit 2	6	Indole	117	120-72-9	28.37	5478
15	2	WW	Deep pit 2	6	Indole	117	120-72-9	28.37	3819
1	2	Control	Deep pit 1	7	Indole	117	120-72-9	28.37	12720
2	2	Control	Deep pit 2	7	Indole	117	120-72-9	28.37	17593
3	2	WW	Deep pit 3	7	Indole	117	120-72-9	28.37	7486
4	2	MTM	Deep pit 1	7	Indole	117	120-72-9	28.37	8704
5	2	Enviro	Deep pit 1	7	Indole	117	120-72-9	28.37	10060
6	2	MTM	Deep pit 2	7	Indole	117	120-72-9	28.37	73168
7	2	Oxydol	Deep pit 2	7	Indole	117	120-72-9	28.37	45088
8	2	Oxydol	Deep pit 3	7	Indole	117	120-72-9	28.37	8958
9	2	MTM	Deep pit 3	7	Indole	117	120-72-9	28.37	9277
10	2	WW	Deep pit 1	7	Indole	117	120-72-9	28.37	12940
11	2	Control	Deep pit 3	7	Indole	117	120-72-9	28.37	5590
12	2	Enviro	Deep pit 3	7	Indole	117	120-72-9	28.37	5128
13	2	Oxydol	Deep pit 1	7	Indole	117	120-72-9	28.37	4921
14	2	Enviro	Deep pit 2	7	Indole	117	120-72-9	28.37	45519
15	2	WW	Deep pit 2	7	Indole	117	120-72-9	28.37	5833
1	2	Control	Deep pit 1	8	Indole	117	120-72-9	28.37	55889
2	2	Control	Deep pit 2	8	Indole	117	120-72-9	28.37	17535
3	2	WW	Deep pit 3	8	Indole	117	120-72-9	28.37	9602
4	2	MTM	Deep pit 1	8	Indole	117	120-72-9	28.37	51037
5	2	Enviro	Deep pit 1	8	Indole	117	120-72-9	28.37	38407
6	2	MTM	Deep pit 2	8	Indole	117	120-72-9	28.37	11050
7	2	Oxydol	Deep pit 2	8	Indole	117	120-72-9	28.37	20930
8	2	Oxydol	Deep pit 3	8	Indole	117	120-72-9	28.37	16192
9	2	MTM	Deep pit 3	8	Indole	117	120-72-9	28.37	25575
10	2	WW	Deep pit 1	8	Indole	117	120-72-9	28.37	85018
11	2	Control	Deep pit 3	8	Indole	117	120-72-9	28.37	18472
12	2	Enviro	Deep pit 3	8	Indole	117	120-72-9	28.37	16191
13	2	Oxydol	Deep pit 1	8	Indole	117	120-72-9	28.37	81888
14	2	Enviro	Deep pit 2	8	Indole	117	120-72-9	28.37	15484
15	2	WW	Deep pit 2	8	Indole	117	120-72-9	28.37	20776
1	2	Control	Deep pit 1	-1	p-Cresol	107	106-44-5	23.32	1642
2	2	Control	Deep pit 2	-1	p-Cresol	107	106-44-5	23.32	115519
3	2	WW	Deep pit 3	-1	p-Cresol	107	106-44-5	23.32	939
4	2	MTM	Deep pit 1	-1	p-Cresol	107	106-44-5	23.32	4750
5	2	Enviro	Deep pit 1	-1	p-Cresol	107	106-44-5	23.32	1964
6	2	MTM	Deep pit 2	-1	p-Cresol	107	106-44-5	23.32	290081
7	2	Oxydol	Deep pit 2	-1	p-Cresol	107	106-44-5	23.32	952701
8	2	Oxydol	Deep pit 3	-1	p-Cresol	107	106-44-5	23.32	4203
9	2	MTM	Deep pit 3	-1	p-Cresol	107	106-44-5	23.32	1251
10	2	WW	Deep pit 1	-1	p-Cresol	107	106-44-5	23.32	3680
11	2	Control	Deep pit 3	-1	p-Cresol	107	106-44-5	23.32	1732
12	2	Enviro	Deep pit 3	-1	p-Cresol	107	106-44-5	23.32	2832
13	2	Oxydol	Deep pit 1	-1	p-Cresol	107	106-44-5	23.32	36922
14	2	Enviro	Deep pit 2	-1	p-Cresol	107	106-44-5	23.32	95944
15	2	WW	Deep pit 2	-1	p-Cresol	107	106-44-5	23.32	932970
1	2	Control	Deep pit 1	1	p-Cresol	107	106-44-5	23.32	28633
2	2	Control	Deep pit 2	1	p-Cresol	107	106-44-5	23.32	758628
3	2	WW	Deep pit 3	1	p-Cresol	107	106-44-5	23.32	16507
4	2	MTM	Deep pit 1	1	p-Cresol	107	106-44-5	23.32	3845
5	2	Enviro	Deep pit 1	1	p-Cresol	107	106-44-5	23.32	3360
6	2	MTM	Deep pit 2	1	p-Cresol	107	106-44-5	23.32	174738
7	2	Oxydol	Deep pit 2	1	p-Cresol	107	106-44-5	23.32	1392314
8	2	Oxydol	Deep pit 3	1	p-Cresol	107	106-44-5	23.32	4040
9	2	MTM	Deep pit 3	1	p-Cresol	107	106-44-5	23.32	2787
10	2	WW	Deep pit 1	1	p-Cresol	107	106-44-5	23.32	2901
11	2	Control	Deep pit 3	1	p-Cresol	107	106-44-5	23.32	5913
12	2	Enviro	Deep pit 3	1	p-Cresol	107	106-44-5	23.32	4250
13	2	Oxydol	Deep pit 1	1	p-Cresol	107	106-44-5	23.32	235780
14	2	Enviro	Deep pit 2	1	p-Cresol	107	106-44-5	23.32	605711
15	2	WW	Deep pit 2	1	p-Cresol	107	106-44-5	23.32	174499
1	2	Control	Deep pit 1	2	p-Cresol	107	106-44-5	23.32	296191
2	2	Control	Deep pit 2	2	p-Cresol	107	106-44-5	23.32	2049030
3	2	WW	Deep pit 3	2	p-Cresol	107	106-44-5	23.32	355284
4	2	MTM	Deep pit 1	2	p-Cresol	107	106-44-5	23.32	56908
5	2	Enviro	Deep pit 1	2	p-Cresol	107	106-44-5	23.32	7942
6	2	MTM	Deep pit 2	2	p-Cresol	107	106-44-5	23.32	258292
7	2	Oxydol	Deep pit 2	2	p-Cresol	107	106-44-5	23.32	2500135
8	2	Oxydol	Deep pit 3	2	p-Cresol	107	106-44-5	23.32	94845
9	2	MTM	Deep pit 3	2	p-Cresol	107	106-44-5	23.32	56503
10	2	WW	Deep pit 1	2	p-Cresol	107	106-44-5	23.32	71212
11	2	Control	Deep pit 3	2	p-Cresol	107	106-44-5	23.32	32011
12	2	Enviro	Deep pit 3	2	p-Cresol	107	106-44-5	23.32	195125
13	2	Oxydol	Deep pit 1	2	p-Cresol	107	106-44-5	23.32	782148
14	2	Enviro	Deep pit 2	2	p-Cresol	107	106-44-5	23.32	562489
15	2	WW	Deep pit 2	2	p-Cresol	107	106-44-5	23.32	94856
1	2	Control	Deep pit 1	3	p-Cresol	107	106-44-5	23.32	1400901
2	2	Control	Deep pit 2	3	p-Cresol	107	106-44-5	23.32	1856773
3	2	WW	Deep pit 3	3	p-Cresol	107	106-44-5	23.32	1683030
4	2	MTM	Deep pit 1	3	p-Cresol	107	106-44-5	23.32	684045
5	2	Enviro	Deep pit 1	3	p-Cresol	107	106-44-5	23.32	161255
6	2	MTM	Deep pit 2	3	p-Cresol	107	106-44-5	23.32	2449059
7	2	Oxydol	Deep pit 2	3	p-Cresol	107	106-44-5	23.32	3185311
8	2	Oxydol	Deep pit 3	3	p-Cresol	107	106-44-5	23.32	688265
9	2	MTM	Deep pit 3	3	p-Cresol	107	106-44-5	23.32	696409
10	2	WW	Deep pit 1	3	p-Cresol	107	106-44-5	23.32	618123
11	2	Control	Deep pit 3	3	p-Cresol	107	106-44-5	23.32	682251
12	2	Enviro	Deep pit 3	3	p-Cresol	107	106-44-5	23.32	574973
13	2	Oxydol	Deep pit 1	3	p-Cresol	107	106-44-5	23.32	1016229
14	2	Enviro	Deep pit 2	3	p-Cresol	107	106-44-5	23.32	2344109
15	2	WW	Deep pit 2	3	p-Cresol	107	106-44-5	23.32	1831896
1	2	Control	Deep pit 1	4	p-Cresol	107	106-44-5	23.32	1740248
2	2	Control	Deep pit 2	4	p-Cresol	107	106-44-5	23.32	1530293
3	2	WW	Deep pit 3	4	p-Cresol	107	106-44-5	23.32	919235
4	2	MTM	Deep pit 1	4	p-Cresol	107	106-44-5	23.32	2824589
5	2	Enviro	Deep pit 1	4	p-Cresol	107	106-44-5	23.32	1966674
6	2	MTM	Deep pit 2	4	p-Cresol	107	106-44-5	23.32	1570869
7	2	Oxydol	Deep pit 2	4	p-Cresol	107	106-44-5	23.32	5401390
8	2	Oxydol	Deep pit 3	4	p-Cresol	107	106-44-5	23.32	2279056
9	2	MTM	Deep pit 3	4	p-Cresol	107	106-44-5	23.32	2781773
10	2	WW	Deep pit 1	4	p-Cresol	107	106-44-5	23.32	1771665
11	2	Control	Deep pit 3	4	p-Cresol	107	106-44-5	23.32	3093532
12	2	Enviro	Deep pit 3	4	p-Cresol	107	106-44-5	23.32	2159958
13	2	Oxydol	Deep pit 1	4	p-Cresol	107	106-44-5	23.32	1406317
14	2	Enviro	Deep pit 2	4	p-Cresol	107	106-44-5	23.32	4042320
15	2	WW	Deep pit 2	4	p-Cresol	107	106-44-5	23.32	919807
1	2	Control	Deep pit 1	5	p-Cresol	107	106-44-5	23.32	711823
2	2	Control	Deep pit 2	5	p-Cresol	107	106-44-5	23.32	3250672
3	2	WW	Deep pit 3	5	p-Cresol	107	106-44-5	23.32	652440
4	2	MTM	Deep pit 1	5	p-Cresol	107	106-44-5	23.32	488930
5	2	Enviro	Deep pit 1	5	p-Cresol	107	106-44-5	23.32	783909
6	2	MTM	Deep pit 2	5	p-Cresol	107	106-44-5	23.32	2800970
7	2	Oxydol	Deep pit 2	5	p-Cresol	107	106-44-5	23.32	3495451
8	2	Oxydol	Deep pit 3	5	p-Cresol	107	106-44-5	23.32	2096596
9	2	MTM	Deep pit 3	5	p-Cresol	107	106-44-5	23.32	2567902
10	2	WW	Deep pit 1	5	p-Cresol	107	106-44-5	23.32	428577
11	2	Control	Deep pit 3	5	p-Cresol	107	106-44-5	23.32	245472
12	2	Enviro	Deep pit 3	5	p-Cresol	107	106-44-5	23.32	1458433
13	2	Oxydol	Deep pit 1	5	p-Cresol	107	106-44-5	23.32	635376
14	2	Enviro	Deep pit 2	5	p-Cresol	107	106-44-5	23.32	1791205
15	2	WW	Deep pit 2	5	p-Cresol	107	106-44-5	23.32	2226174
1	2	Control	Deep pit 1	6	p-Cresol	107	106-44-5	23.32	821047
2	2	Control	Deep pit 2	6	p-Cresol	107	106-44-5	23.32	624617
3	2	WW	Deep pit 3	6	p-Cresol	107	106-44-5	23.32	1347411
4	2	MTM	Deep pit 1	6	p-Cresol	107	106-44-5	23.32	1127712
5	2	Enviro	Deep pit 1	6	p-Cresol	107	106-44-5	23.32	1031851
6	2	MTM	Deep pit 2	6	p-Cresol	107	106-44-5	23.32	557812
7	2	Oxydol	Deep pit 2	6	p-Cresol	107	106-44-5	23.32	1898368
8	2	Oxydol	Deep pit 3	6	p-Cresol	107	106-44-5	23.32	2054496
9	2	MTM	Deep pit 3	6	p-Cresol	107	106-44-5	23.32	2150880
10	2	WW	Deep pit 1	6	p-Cresol	107	106-44-5	23.32	652748
11	2	Control	Deep pit 3	6	p-Cresol	107	106-44-5	23.32	1176724
12	2	Enviro	Deep pit 3	6	p-Cresol	107	106-44-5	23.32	1406640
13	2	Oxydol	Deep pit 1	6	p-Cresol	107	106-44-5	23.32	428486
14	2	Enviro	Deep pit 2	6	p-Cresol	107	106-44-5	23.32	343862
15	2	WW	Deep pit 2	6	p-Cresol	107	106-44-5	23.32	601789
1	2	Control	Deep pit 1	7	p-Cresol	107	106-44-5	23.32	351392
2	2	Control	Deep pit 2	7	p-Cresol	107	106-44-5	23.32	2881607
3	2	WW	Deep pit 3	7	p-Cresol	107	106-44-5	23.32	3013718
4	2	MTM	Deep pit 1	7	p-Cresol	107	106-44-5	23.32	439685
5	2	Enviro	Deep pit 1	7	p-Cresol	107	106-44-5	23.32	538856
6	2	MTM	Deep pit 2	7	p-Cresol	107	106-44-5	23.32	2969374
7	2	Oxydol	Deep pit 2	7	p-Cresol	107	106-44-5	23.32	3625968
8	2	Oxydol	Deep pit 3	7	p-Cresol	107	106-44-5	23.32	4190338
9	2	MTM	Deep pit 3	7	p-Cresol	107	106-44-5	23.32	1828029
10	2	WW	Deep pit 1	7	p-Cresol	107	106-44-5	23.32	514355
11	2	Control	Deep pit 3	7	p-Cresol	107	106-44-5	23.32	1078701
12	2	Enviro	Deep pit 3	7	p-Cresol	107	106-44-5	23.32	983808
13	2	Oxydol	Deep pit 1	7	p-Cresol	107	106-44-5	23.32	302095
14	2	Enviro	Deep pit 2	7	p-Cresol	107	106-44-5	23.32	1329234
15	2	WW	Deep pit 2	7	p-Cresol	107	106-44-5	23.32	1121259
1	2	Control	Deep pit 1	8	p-Cresol	107	106-44-5	23.32	3912798
2	2	Control	Deep pit 2	8	p-Cresol	107	106-44-5	23.32	2560547
3	2	WW	Deep pit 3	8	p-Cresol	107	106-44-5	23.32	3718156
4	2	MTM	Deep pit 1	8	p-Cresol	107	106-44-5	23.32	3936012
5	2	Enviro	Deep pit 1	8	p-Cresol	107	106-44-5	23.32	3430545
6	2	MTM	Deep pit 2	8	p-Cresol	107	106-44-5	23.32	591731
7	2	Oxydol	Deep pit 2	8	p-Cresol	107	106-44-5	23.32	5085328
8	2	Oxydol	Deep pit 3	8	p-Cresol	107	106-44-5	23.32	6336478
9	2	MTM	Deep pit 3	8	p-Cresol	107	106-44-5	23.32	8551820
10	2	WW	Deep pit 1	8	p-Cresol	107	106-44-5	23.32	6120354
11	2	Control	Deep pit 3	8	p-Cresol	107	106-44-5	23.32	5610348
12	2	Enviro	Deep pit 3	8	p-Cresol	107	106-44-5	23.32	3424555
13	2	Oxydol	Deep pit 1	8	p-Cresol	107	106-44-5	23.32	3625721
14	2	Enviro	Deep pit 2	8	p-Cresol	107	106-44-5	23.32	1247566
15	2	WW	Deep pit 2	8	p-Cresol	107	106-44-5	23.32	3146458
1	2	Control	Deep pit 1	-1	Phenol	94	108-95-2	22.06	3081
2	2	Control	Deep pit 2	-1	Phenol	94	108-95-2	22.06	845245
3	2	WW	Deep pit 3	-1	Phenol	94	108-95-2	22.06	1955
4	2	MTM	Deep pit 1	-1	Phenol	94	108-95-2	22.06	4981
5	2	Enviro	Deep pit 1	-1	Phenol	94	108-95-2	22.06	2731
6	2	MTM	Deep pit 2	-1	Phenol	94	108-95-2	22.06	1491946
7	2	Oxydol	Deep pit 2	-1	Phenol	94	108-95-2	22.06	1785442
8	2	Oxydol	Deep pit 3	-1	Phenol	94	108-95-2	22.06	4774
9	2	MTM	Deep pit 3	-1	Phenol	94	108-95-2	22.06	1122
10	2	WW	Deep pit 1	-1	Phenol	94	108-95-2	22.06	15003
11	2	Control	Deep pit 3	-1	Phenol	94	108-95-2	22.06	4160
12	2	Enviro	Deep pit 3	-1	Phenol	94	108-95-2	22.06	3632
13	2	Oxydol	Deep pit 1	-1	Phenol	94	108-95-2	22.06	36486
14	2	Enviro	Deep pit 2	-1	Phenol	94	108-95-2	22.06	983267
15	2	WW	Deep pit 2	-1	Phenol	94	108-95-2	22.06	2422934
1	2	Control	Deep pit 1	1	Phenol	94	108-95-2	22.06	31331
2	2	Control	Deep pit 2	1	Phenol	94	108-95-2	22.06	1499016
3	2	WW	Deep pit 3	1	Phenol	94	108-95-2	22.06	13940
4	2	MTM	Deep pit 1	1	Phenol	94	108-95-2	22.06	5452
5	2	Enviro	Deep pit 1	1	Phenol	94	108-95-2	22.06	7126
6	2	MTM	Deep pit 2	1	Phenol	94	108-95-2	22.06	1762954
7	2	Oxydol	Deep pit 2	1	Phenol	94	108-95-2	22.06	2364978
8	2	Oxydol	Deep pit 3	1	Phenol	94	108-95-2	22.06	4649
9	2	MTM	Deep pit 3	1	Phenol	94	108-95-2	22.06	2786
10	2	WW	Deep pit 1	1	Phenol	94	108-95-2	22.06	6007
11	2	Control	Deep pit 3	1	Phenol	94	108-95-2	22.06	9977
12	2	Enviro	Deep pit 3	1	Phenol	94	108-95-2	22.06	6924
13	2	Oxydol	Deep pit 1	1	Phenol	94	108-95-2	22.06	35662
14	2	Enviro	Deep pit 2	1	Phenol	94	108-95-2	22.06	3300288
15	2	WW	Deep pit 2	1	Phenol	94	108-95-2	22.06	3871955
1	2	Control	Deep pit 1	2	Phenol	94	108-95-2	22.06	636019
2	2	Control	Deep pit 2	2	Phenol	94	108-95-2	22.06	2296988
3	2	WW	Deep pit 3	2	Phenol	94	108-95-2	22.06	426403
4	2	MTM	Deep pit 1	2	Phenol	94	108-95-2	22.06	119748
5	2	Enviro	Deep pit 1	2	Phenol	94	108-95-2	22.06	15420
6	2	MTM	Deep pit 2	2	Phenol	94	108-95-2	22.06	3272353
7	2	Oxydol	Deep pit 2	2	Phenol	94	108-95-2	22.06	4527426
8	2	Oxydol	Deep pit 3	2	Phenol	94	108-95-2	22.06	244917
9	2	MTM	Deep pit 3	2	Phenol	94	108-95-2	22.06	52989
10	2	WW	Deep pit 1	2	Phenol	94	108-95-2	22.06	87691
11	2	Control	Deep pit 3	2	Phenol	94	108-95-2	22.06	77321
12	2	Enviro	Deep pit 3	2	Phenol	94	108-95-2	22.06	323153
13	2	Oxydol	Deep pit 1	2	Phenol	94	108-95-2	22.06	253358
14	2	Enviro	Deep pit 2	2	Phenol	94	108-95-2	22.06	3286286
15	2	WW	Deep pit 2	2	Phenol	94	108-95-2	22.06	2367697
1	2	Control	Deep pit 1	3	Phenol	94	108-95-2	22.06	2495956
2	2	Control	Deep pit 2	3	Phenol	94	108-95-2	22.06	3189128
3	2	WW	Deep pit 3	3	Phenol	94	108-95-2	22.06	0
4	2	MTM	Deep pit 1	3	Phenol	94	108-95-2	22.06	0
5	2	Enviro	Deep pit 1	3	Phenol	94	108-95-2	22.06	861361
6	2	MTM	Deep pit 2	3	Phenol	94	108-95-2	22.06	6757207
7	2	Oxydol	Deep pit 2	3	Phenol	94	108-95-2	22.06	5762750
8	2	Oxydol	Deep pit 3	3	Phenol	94	108-95-2	22.06	1346717
9	2	MTM	Deep pit 3	3	Phenol	94	108-95-2	22.06	1657172
10	2	WW	Deep pit 1	3	Phenol	94	108-95-2	22.06	1208365
11	2	Control	Deep pit 3	3	Phenol	94	108-95-2	22.06	2401546
12	2	Enviro	Deep pit 3	3	Phenol	94	108-95-2	22.06	1957260
13	2	Oxydol	Deep pit 1	3	Phenol	94	108-95-2	22.06	501166
14	2	Enviro	Deep pit 2	3	Phenol	94	108-95-2	22.06	7762918
15	2	WW	Deep pit 2	3	Phenol	94	108-95-2	22.06	7273732
1	2	Control	Deep pit 1	4	Phenol	94	108-95-2	22.06	1435900
2	2	Control	Deep pit 2	4	Phenol	94	108-95-2	22.06	4586073
3	2	WW	Deep pit 3	4	Phenol	94	108-95-2	22.06	373868
4	2	MTM	Deep pit 1	4	Phenol	94	108-95-2	22.06	2177080
5	2	Enviro	Deep pit 1	4	Phenol	94	108-95-2	22.06	1807362
6	2	MTM	Deep pit 2	4	Phenol	94	108-95-2	22.06	8043091
7	2	Oxydol	Deep pit 2	4	Phenol	94	108-95-2	22.06	13787663
8	2	Oxydol	Deep pit 3	4	Phenol	94	108-95-2	22.06	398737
9	2	MTM	Deep pit 3	4	Phenol	94	108-95-2	22.06	912532
10	2	WW	Deep pit 1	4	Phenol	94	108-95-2	22.06	852326
11	2	Control	Deep pit 3	4	Phenol	94	108-95-2	22.06	1364985
12	2	Enviro	Deep pit 3	4	Phenol	94	108-95-2	22.06	1128480
13	2	Oxydol	Deep pit 1	4	Phenol	94	108-95-2	22.06	361450
14	2	Enviro	Deep pit 2	4	Phenol	94	108-95-2	22.06	7332894
15	2	WW	Deep pit 2	4	Phenol	94	108-95-2	22.06	6873033
1	2	Control	Deep pit 1	5	Phenol	94	108-95-2	22.06	944821
2	2	Control	Deep pit 2	5	Phenol	94	108-95-2	22.06	6056526
3	2	WW	Deep pit 3	5	Phenol	94	108-95-2	22.06	393744
4	2	MTM	Deep pit 1	5	Phenol	94	108-95-2	22.06	1512441
5	2	Enviro	Deep pit 1	5	Phenol	94	108-95-2	22.06	1622298
6	2	MTM	Deep pit 2	5	Phenol	94	108-95-2	22.06	7445916
7	2	Oxydol	Deep pit 2	5	Phenol	94	108-95-2	22.06	6739581
8	2	Oxydol	Deep pit 3	5	Phenol	94	108-95-2	22.06	204809
9	2	MTM	Deep pit 3	5	Phenol	94	108-95-2	22.06	417969
10	2	WW	Deep pit 1	5	Phenol	94	108-95-2	22.06	1233180
11	2	Control	Deep pit 3	5	Phenol	94	108-95-2	22.06	387090
12	2	Enviro	Deep pit 3	5	Phenol	94	108-95-2	22.06	394091
13	2	Oxydol	Deep pit 1	5	Phenol	94	108-95-2	22.06	429096
14	2	Enviro	Deep pit 2	5	Phenol	94	108-95-2	22.06	10016174
15	2	WW	Deep pit 2	5	Phenol	94	108-95-2	22.06	7608267
1	2	Control	Deep pit 1	6	Phenol	94	108-95-2	22.06	600625
2	2	Control	Deep pit 2	6	Phenol	94	108-95-2	22.06	2545395
3	2	WW	Deep pit 3	6	Phenol	94	108-95-2	22.06	205675
4	2	MTM	Deep pit 1	6	Phenol	94	108-95-2	22.06	787507
5	2	Enviro	Deep pit 1	6	Phenol	94	108-95-2	22.06	925669
6	2	MTM	Deep pit 2	6	Phenol	94	108-95-2	22.06	3097358
7	2	Oxydol	Deep pit 2	6	Phenol	94	108-95-2	22.06	5261909
8	2	Oxydol	Deep pit 3	6	Phenol	94	108-95-2	22.06	202755
9	2	MTM	Deep pit 3	6	Phenol	94	108-95-2	22.06	342243
10	2	WW	Deep pit 1	6	Phenol	94	108-95-2	22.06	857805
11	2	Control	Deep pit 3	6	Phenol	94	108-95-2	22.06	166386
12	2	Enviro	Deep pit 3	6	Phenol	94	108-95-2	22.06	337192
13	2	Oxydol	Deep pit 1	6	Phenol	94	108-95-2	22.06	252604
14	2	Enviro	Deep pit 2	6	Phenol	94	108-95-2	22.06	2381002
15	2	WW	Deep pit 2	6	Phenol	94	108-95-2	22.06	3704265
1	2	Control	Deep pit 1	7	Phenol	94	108-95-2	22.06	610459
[truncated: 2,396 more rows]
